# Supplementary material for: HKDC1 Silencing Inhibits Proliferation and Glycolysis of Gastric Cancer Cells
Source: J Oncol. 2023 Apr 28;2023:3876342. doi: 10.1155/2023/3876342 (PMC10162881; doi:10.1155/2023/3876342)
Supplement: Supplementary Materials — Suppl 1: list of significantly changed DEGs from the GEO database (p < 0.05). Suppl 2. List of significantly changed DEGs after screened using Gene Set Enrichment Analysis (p < 0.05). [file 3876342.f1.zip]

Archive with 2 entries (2 files):
- Sup1.txt
- Sup2.txt
