# Supplementary material for: HKDC1 Silencing Inhibits Proliferation and Glycolysis of Gastric Cancer Cells
Source: J Oncol. 2023 Apr 28;2023:3876342. doi: 10.1155/2023/3876342 (PMC10162881; doi:10.1155/2023/3876342)
Supplement: Supplementary Materials — Suppl 1: list of significantly changed DEGs from the GEO database (p < 0.05). Suppl 2. List of significantly changed DEGs after screened using Gene Set Enrichment Analysis (p < 0.05). [file 3876342.f1.zip › Sup1.txt]

id	logFC	AveExpr	t	P.Value	adj.P.Val	B
MAL	-3.49014477447023	3.98829494907527	-13.1226318504539	2.37398598557861e-28	3.214614423072e-24	53.6220585630685
PRDM16	-1.28993135262835	3.71294455775806	-12.8946269473239	1.14128388919185e-27	7.72706257177339e-24	52.0872853591491
SST	-3.54071416892454	3.73359388689247	-12.5979287902321	8.78661229884643e-27	3.96598390462265e-23	50.0918595132874
SLC9A1	-1.69708966429527	5.76693904574731	-12.0032102277784	5.19440179390961e-25	1.75843486728325e-21	46.1025779979933
SYT4	-2.3438719802746	3.55113891983871	-11.7191489150785	3.61716331145868e-24	9.7960016800924e-21	44.2044644799049
ADHFE1	-2.27123761713914	3.94743582044086	-11.6740742062932	4.91876090170679e-24	1.11008235616686e-20	43.9038270777003
CAPN9	-2.93080027232496	4.41602769002688	-11.3904332142805	3.38877347093387e-23	6.55534022427365e-20	42.0160184171837
NPAS1	-1.74679137354401	3.65085056676882	-11.1249983330035	2.04763687491574e-22	3.46588136540425e-19	40.2564757454404
NRG4	-1.66546952720236	3.43526565315591	-11.0762605765127	2.84657849804234e-22	4.28283549355459e-19	39.9342330195912
SEC14L5	-1.51699742723956	3.27876442249462	-11.0328320507999	3.81684804942963e-22	5.16839394373267e-19	39.6473265165804
KCNE2	-3.44948363475692	4.1998960652957	-10.8746366447546	1.10880724904368e-21	1.17783815426985e-18	38.6041612736017
ELL2	-1.03908477657983	4.69495327691398	-10.8611056436317	1.21452464844969e-21	1.17783815426985e-18	38.5150821500342
ADRB2	-1.84378938357753	4.20462527875269	-10.8607098977875	1.21776339707392e-21	1.17783815426985e-18	38.5124771795693
SIDT2	-1.33877782684647	5.92704869316129	-10.8148313052991	1.65799673211845e-21	1.49672891664106e-18	38.2106234095462
ABCC5	-1.4845248977407	4.85433554604301	-10.7784259075753	2.11759904409644e-21	1.79215054100687e-18	37.9712963736287
ATP4A	-6.09038798052472	5.05906674383871	-10.7106386061133	3.33802860288889e-21	2.65883795951285e-18	37.5261465325872
SOSTDC1	-2.60289345305939	4.01632662548925	-10.6620918978665	4.622363038814e-21	3.47730099492113e-18	37.2077402476562
CIRBP	-1.06642184525027	6.62351819555914	-10.6232852537385	5.9947022487043e-21	4.27232963945815e-18	36.9534585162176
PI16	-2.01389443099204	4.23469705401613	-10.6032894247244	6.85339593298852e-21	4.54024515210738e-18	36.8225204911599
OSBPL7	-1.31386870697229	4.30141999632258	-10.5908607025606	7.44782705814607e-21	4.54024515210738e-18	36.7411634419158
DGKD	-1.09017561636706	4.20206909182796	-10.5853465328779	7.72775202474525e-21	4.54024515210738e-18	36.7050755875408
CHAD	-1.47295069649243	3.49099142979032	-10.5795996043983	8.030656406233e-21	4.54024515210738e-18	36.6674692158519
PER3	-1.7403739971572	4.12074119743011	-10.5792936971934	8.04710757333853e-21	4.54024515210738e-18	36.6654675776892
CKMT2	-2.47574724762819	3.80801896415591	-10.5127188508777	1.25578611215564e-20	6.80183989787983e-18	36.2301829863369
CAPN13	-1.94561170644283	4.1278215668871	-10.461731333885	1.76497786377079e-20	9.19214048204628e-18	35.8972697185687
KCNJ16	-2.65258832969953	3.89172925589785	-10.4529164003415	1.87187869344958e-20	9.254199120152e-18	35.8397552427899
GIF	-5.2019863047009	4.86936222841398	-10.4496132542481	1.91357784036819e-20	9.254199120152e-18	35.8182064640337
ATP4B	-4.79507860135757	4.49480824337097	-10.3722058698049	3.20523655333232e-20	1.44673693895576e-17	35.3137190767792
ATP1B3	1.23322981362651	5.22636196435484	10.3404572186652	3.95928938532002e-20	1.72944314731027e-17	35.1070832197249
MFSD4	-1.88757672825088	3.74944542886559	-10.3000570580634	5.17932710786793e-20	2.19166463648874e-17	34.8443793881568
SOX21	-2.8408909150176	3.94453927554839	-10.2519327283611	7.12979886554574e-20	2.9255941344956e-17	34.5318059988316
RDH12	-2.20608788250513	3.59516605778495	-10.2462115995359	7.4057183937626e-20	2.94943625793939e-17	34.4946727382407
CLDN1	2.51060201762774	4.54381996719355	10.213417877213	9.20535790423011e-20	3.56142146803371e-17	34.2819320931763
CST1	2.51744788029359	4.5474436006129	10.1685587626247	1.23919794432853e-19	4.66110537893127e-17	33.991223284183
GPR64	-1.57762576160983	3.60983696487634	-10.0820295233063	2.19645917462189e-19	8.03844694150134e-17	33.4314826401697
EEF1A2	-2.37521347882167	3.84302651024731	-10.0662329088633	2.43803607925132e-19	8.68774909187952e-17	33.3294440060401
FBXL13	-1.56478169110516	3.41756524025806	-10.0156399205004	3.40443579498523e-19	1.18203756666398e-16	33.0029480586382
SLC7A8	-1.34374570686055	3.85639405368817	-9.99071540579189	4.01240677854659e-19	1.35830000470748e-16	32.8422768406881
UBL3	-1.07037324587249	5.64034739639247	-9.95155529851107	5.19299886378612e-19	1.70695355653331e-16	32.590077021463
FAM20A	-1.7010407247257	3.83727551663978	-9.94861612882608	5.29444275713751e-19	1.70695355653331e-16	32.5711599739809
TTYH3	1.03528443825394	5.08345607615591	9.82898919583419	1.16189862153398e-18	3.65889982190504e-16	31.8026532990787
RAB27A	-1.17441752431379	3.96902411131183	-9.76605739817929	1.75485545663293e-18	5.40056766778785e-16	31.3995179425876
FBP2	-1.97213085747421	3.54723946797312	-9.73150021510999	2.2000069824922e-18	6.62006545553932e-16	31.1784944145382
SFTPD	-1.00329738416685	3.40244701225806	-9.65373006283409	3.65581798669309e-18	1.07616155125676e-15	30.6820042836359
OLFML2B	1.00217509540869	4.3601781888871	9.62778807312874	4.32945369661845e-18	1.2473432448066e-15	30.5166763730269
SLC44A2	-1.08556539348033	6.44530966004839	-9.5943982282804	5.38115358841221e-18	1.50298106523405e-15	30.3040986422344
C6orf204	-1.14032361900735	3.54571466630645	-9.59276265572549	5.43874693128043e-18	1.50298106523405e-15	30.2936919761967
PSCA	-3.28569217954768	4.98036490213441	-9.56382657247556	6.56528663223965e-18	1.77801092574314e-15	30.1096777568364
ERO1LB	-1.24710195023466	3.7166987171129	-9.55084194335853	7.14354638703323e-18	1.86020695436186e-15	30.027164494857
ALDH3A1	-2.56614727607837	5.10884703286021	-9.4645656955849	1.25050642919668e-17	3.19492595429286e-15	29.4798694495177
PELI2	-1.317721780848	4.42514897527957	-9.42072083271486	1.66104803720714e-17	4.16523175404109e-15	29.202391366691
ANKRD29	-1.303536748818	3.89943277258065	-9.41111222201254	1.76757086076155e-17	4.35175945919494e-15	29.141641692958
RNASE1	-1.60356533578233	5.6516187517957	-9.32260488563491	3.13032087338672e-17	7.18435168585248e-15	28.583087031696
RAB37	-1.41995425931808	3.83517330474731	-9.28283143335848	4.04451602064286e-17	8.97816253041394e-15	28.3326957716954
GPT2	-1.37743954535313	5.37442111341935	-9.25069093420892	4.97355859094702e-17	1.06899931555577e-14	28.1306396209969
SCGB2A1	-2.58912295003521	4.02345094795699	-9.23494807245738	5.50316848601177e-17	1.14643699183208e-14	28.0317626960847
APOBEC2	-2.0617161808379	3.89616278893548	-9.21243013368282	6.35952419248609e-17	1.3047623801584e-14	27.8904403204536
SSTR1	-1.45754015022287	3.57281145952688	-9.2037151741058	6.72542287733733e-17	1.35923807734365e-14	27.8357793229128
ACSM1	-1.08650824608909	3.24886438333333	-9.10577732634029	1.25943124985072e-16	2.47158819626501e-14	27.222828047348
AKR7A3	-1.36713000240931	5.52825974839785	-9.09941994334275	1.31166696594525e-16	2.53732605512352e-14	27.1831249447432
KCNJ15	-1.69896940757355	3.50156539702151	-9.05967079386397	1.69071707274497e-16	3.17972220583885e-14	26.9351224569495
ADAM28	-1.37804667410838	4.05741579843011	-9.02537596268182	2.10400555827205e-16	3.85004584656241e-14	26.7214841314411
SYTL4	-1.20096149263508	4.50766502999462	-9.01767816723252	2.20976814161163e-16	3.98966272074175e-14	26.6735738524131
METTL7A	-1.32899697649273	6.26546155240323	-8.98839214185036	2.66268067851226e-16	4.74412619312296e-14	26.4914452998725
DISP1	-1.23239697526006	5.07342492807527	-8.9174679865336	4.17833842192889e-16	7.25370263735116e-14	26.0513308156232
FER1L4	-1.86496391929343	4.54769939350538	-8.87899594202204	5.33215739277614e-16	9.13958775387111e-14	25.8131720910822
C11orf9	-1.19576914511863	4.60863507260215	-8.86522376812058	5.81794775181928e-16	9.84760381342311e-14	25.7280161737313
OTUD1	-1.05444539349089	4.62276942689247	-8.82046724041674	7.72095815989988e-16	1.26094761371921e-13	25.4516453500519
THY1	1.09406647765881	5.9252895661129	8.8203020370315	7.72901941796726e-16	1.26094761371921e-13	25.4506262681827
BCAS1	-1.85284979779795	4.62360406672043	-8.80483746275432	8.5218398705801e-16	1.34179341497122e-13	25.3552650096674
PHYHD1	-1.15709292568713	3.46667983033333	-8.78584145785607	9.60697621734832e-16	1.47827346544447e-13	25.2382206101614
OTX1	1.09997298518185	3.06084943589785	8.74180358570012	1.26791347100757e-15	1.92908048437231e-13	24.9672783775447
SELENBP1	-1.13189659047497	5.35402919440323	-8.70577668050446	1.59034921911785e-15	2.39242688326205e-13	24.7460415132486
SCNN1B	-1.45321793507776	3.5362687471129	-8.70097646018171	1.63904700927468e-15	2.39558538196569e-13	24.716592585304
STOX2	-1.1774109819553	4.38211357192473	-8.67165650469806	1.97032115555971e-15	2.83831050717383e-13	24.5368644873805
FJX1	1.14520300924598	4.1765213948172	8.65947435085417	2.12677528121561e-15	3.00097502449704e-13	24.4622639810392
RNASE4	-1.1589233657234	4.98542954182258	-8.65941513052995	2.12756518980663e-15	3.00097502449704e-13	24.4619014380052
SYTL2	-1.09858678245768	4.63553055562366	-8.61186075074566	2.86576557748952e-15	3.93351572792007e-13	24.1711147198585
HOXA10	2.08820972381907	3.23133212729032	8.61129960935419	2.87584415526244e-15	3.93351572792007e-13	24.1676874897217
GPRC5C	-1.05108696112307	4.96295622918817	-8.60544428896166	2.98313219747019e-15	3.99946466197464e-13	24.1319311712605
SDS	1.01935143369034	3.99872365422043	8.5821170670473	3.45144909082746e-15	4.52601708205685e-13	23.9895832734934
CIDEC	-1.28199618726267	3.94421639660753	-8.5809755016719	3.47615225266903e-15	4.52601708205685e-13	23.98262142596
HOXB7	1.28003444796005	4.86599653687634	8.57067386494805	3.7071632611057e-15	4.73572619987097e-13	23.9198147419355
TMEM27	-1.45791016325195	3.50596551839247	-8.56757598803672	3.77956582679271e-15	4.78309353837384e-13	23.9009340354302
KLF2	-1.14607833102924	7.00832979492473	-8.55660662444593	4.04740195439338e-15	5.02806145545329e-13	23.8341023679211
VILL	-1.40100501692393	4.7537588006129	-8.53049768751187	4.76305618092676e-15	5.81049943657021e-13	23.6751802413836
PTPRZ1	-1.31722788212873	3.52839129812366	-8.51590730061904	5.21627932668034e-15	6.30657485380165e-13	23.5864617777946
TNFRSF12A	1.70374655959253	5.01437373950538	8.50956999937319	5.42622731067712e-15	6.44531087841043e-13	23.5479476577949
HPGD	-1.85257505271039	4.68922873705914	-8.4773057544222	6.63228277796496e-15	7.7420466462434e-13	23.352059821102
ANG	-1.28910242528731	5.96414565366667	-8.47465489586759	6.74246036236262e-15	7.8033893817737e-13	23.3359799715481
CLDN3	2.47284153783484	4.4461182439086	8.46398702970645	7.204506667886e-15	8.26747667710545e-13	23.2712920397048
CLDN7	2.52530151858105	5.18444914337634	8.41536580508219	9.74109026128432e-15	1.09011655560373e-12	22.9769172979303
GPX3	-1.49565213319409	5.39420922286559	-8.41124661602109	9.99289687520775e-15	1.10864146890571e-12	22.9520123891635
BGN	1.23184491597964	6.72441105200538	8.40999993589114	1.00703715143196e-14	1.10864146890571e-12	22.9444759409734
VSIG2	-2.19604506600046	5.82565079091935	-8.39849247408488	1.08142226272716e-14	1.17148310876708e-12	22.8749343443615
VSIG1	-2.47314102387418	4.61327086139785	-8.39500482746177	1.10502448119896e-14	1.18755051586628e-12	22.8538662650163
WISP2	-1.46179727219654	3.84186238275269	-8.38705297600161	1.1607650849965e-14	1.23763149731792e-12	22.8058455424488
EPHB2	1.66420756884509	3.72588369560753	8.36636563899666	1.31918452585583e-14	1.39555294254795e-12	22.6810114295286
SLC9A2	-1.23526891133094	3.89597188585484	-8.34865176651079	1.471748925762e-14	1.52868626105318e-12	22.5742301687232
BHMT	-1.51107838036614	3.15771987693548	-8.33293969898373	1.62163970719463e-14	1.63870322948675e-12	22.4796013784732
STK32B	-1.19030121755564	3.66175875767204	-8.33116970248327	1.63944627695677e-14	1.64442533602012e-12	22.4689462977504
NKX6-2	-3.24171310416853	3.37388786019892	-8.32922606465574	1.6592231138526e-14	1.65202501357927e-12	22.4572471046312
CCKBR	-2.64158155257676	3.21857511016129	-8.32737958672982	1.67823037912903e-14	1.65875310684571e-12	22.4461338826627
DPCR1	-2.64419317522501	4.3831788991129	-8.31988947461728	1.75757150633618e-14	1.72458520052886e-12	22.4010652957905
GUCA2B	-1.55927385147436	3.42016921430108	-8.29826625683607	2.0080948674125e-14	1.94225804283091e-12	22.2710600116656
LIFR	-1.32074989679504	4.19005759709677	-8.29570212079196	2.04005737405552e-14	1.95917850369403e-12	22.2556538618567
CPA2	-2.79517553209306	4.2104055201828	-8.29318054624816	2.07198113160529e-14	1.97582369739911e-12	22.2405055508662
MUC5AC	-3.04813987744344	5.841092323	-8.28869069279916	2.13005458646466e-14	2.01699784302922e-12	22.2135380401117
CDH3	2.04278969712582	4.22159490143548	8.28382818662151	2.19476918808303e-14	2.0638451094328e-12	22.1843397741697
MAP7D2	-1.48353642148171	3.28575861904301	-8.2472940014761	2.7475291458315e-14	2.53960192514684e-12	21.9652112069473
DUOX1	-1.37054368286193	3.45856481266129	-8.23744644536053	2.91880229578495e-14	2.67050688427189e-12	21.9062226852902
HPN	-1.83794624637609	3.2910754432957	-8.23452425988343	2.97163293369513e-14	2.70059607752791e-12	21.8887245538225
FAM46C	-1.29310012978096	5.69598667000538	-8.20825742528321	3.49113728108324e-14	3.15156599487654e-12	21.7315669083894
GDF15	1.74623819657018	5.80810238385484	8.18714458912015	3.97316768685885e-14	3.53951734524709e-12	21.6054152389755
GNMT	-1.06727091605817	3.41987723275269	-8.16976702966368	4.41896709984067e-14	3.88553464278847e-12	21.5016959434921
HOXA13	2.79561295894015	3.31103683294624	8.16760413665835	4.47781301135623e-14	3.91187522495321e-12	21.4887937590936
ELOVL6	-1.06021284872478	4.59275115612366	-8.15837804132951	4.7376732612228e-14	4.08616774714764e-12	21.4337758176943
HOMER2	-1.41151900365055	3.73630637897312	-8.14733805606844	5.06832591298938e-14	4.31636485457794e-12	21.3679794495025
SIGLEC11	-1.68393611226113	3.71352417263441	-8.145865805207	5.11411448071346e-14	4.32813901145881e-12	21.359208256213
CA9	-2.25984615860554	4.89722714822581	-8.10609250674378	6.51882118591844e-14	5.41542071647372e-12	21.122534812674
HKDC1	2.16133098422853	4.26062593702688	8.09836179748741	6.83326368506845e-14	5.6420258267995e-12	21.0765963813629
RARRES1	1.83001752084984	4.40139384676344	8.09378211555289	7.02658002319674e-14	5.76648000570345e-12	21.0493922101003
STS	-1.04176551348553	3.61558304106989	-8.08822905118858	7.26826525944404e-14	5.92889035410433e-12	21.0164157743483
THBS2	2.2094511578728	5.69716125623118	8.07835740018136	7.7184130369907e-14	6.22113279368399e-12	20.9578203463547
IGFALS	-1.70648439914588	3.73353762165591	-8.06326989112893	8.46030585077094e-14	6.73888244266407e-12	20.8683309581872
DUSP26	-1.09293178666937	4.35508128865054	-8.06074830442063	8.59101038786203e-14	6.80297495099647e-12	20.8533823251339
IFITM3	1.01831778655243	7.51860347540323	8.0449119440762	9.45884015399044e-14	7.4466368909991e-12	20.7595513843269
CDA	1.44706627259819	4.48614090592473	8.0273027334157	1.05260609347417e-13	8.23892434204266e-12	20.6553202871141
FAP	1.75449077288076	4.34673391482796	8.00388136919702	1.21323602811085e-13	9.43897100728417e-12	20.5168569507406
CSTA	-1.28380781927721	3.49395613306452	-7.98188960924578	1.38606591604052e-13	1.05442239152274e-11	20.3870235084978
TREM2	1.20671030588658	3.69402275412366	7.97748548610344	1.42350138294488e-13	1.07685096237188e-11	20.3610435945164
HRASLS2	-2.19245599120756	3.81070764306989	-7.97213369071707	1.47034205026988e-13	1.09999456921019e-11	20.3294827523879
EPN3	-1.01060797532665	4.0246888789086	-7.96532581794831	1.53213834602917e-13	1.13649418159703e-11	20.2893499741978
ITPKA	-1.53755029978984	5.15387488199462	-7.96491847426759	1.53591636682857e-13	1.13649418159703e-11	20.2869491910177
UGT2B15	-1.68133837296847	3.61004527427419	-7.96115480550008	1.57126286429617e-13	1.15632991551274e-11	20.2647698884161
TFCP2L1	-1.49694805228257	4.25627344405376	-7.94266907560254	1.75691312083759e-13	1.2790516435087e-11	20.155907835805
ESM1	1.02910910940885	3.74987695363441	7.93036380793775	1.89237246931063e-13	1.36794589857199e-11	20.0835111021528
F12	1.63108053699327	4.64473655517742	7.92976487443784	1.89922331387294e-13	1.36794589857199e-11	20.0799887460986
CGNL1	-1.38675149875096	5.15577157335484	-7.92665374778026	1.93520669691808e-13	1.3791912569983e-11	20.0616941660063
RIPK4	-1.04007387787648	4.46963361019893	-7.92227890833951	1.98695091581999e-13	1.40131783078742e-11	20.035974453626
FA2H	-1.27849054542676	4.42091603281183	-7.90889741019163	2.15387824643211e-13	1.50686364595558e-11	19.9573479090215
FAM101A	-1.47559913444788	4.64065907237634	-7.90766059896677	2.16999048047661e-13	1.50686364595558e-11	19.9500840025998
SLC5A5	-1.07794370041237	3.00631935015054	-7.88472256998186	2.49139314517611e-13	1.71248500400151e-11	19.8154685771005
CAMK2N1	1.61669906683009	5.91572938008064	7.85157954506361	3.04065716706553e-13	2.04843476115594e-11	19.6213062282329
ATP13A4	-1.15978510856896	3.18673193043548	-7.82785809751979	3.50581874478702e-13	2.32840682793232e-11	19.4825888883934
IER5L	1.04953604707118	4.72412532029032	7.81641238619824	3.75480047140776e-13	2.48018308211378e-11	19.4157322766135
PLCXD3	-1.73245723094045	3.46864384052688	-7.78300402646856	4.5860765967459e-13	2.98557996137193e-11	19.2208690645782
LRFN4	1.0698236624765	4.40336249341398	7.77012917970681	4.95296448075022e-13	3.16358924687918e-11	19.1458855518871
KLF4	-1.00854347720052	4.70263288254301	-7.76447715339408	5.12306396163454e-13	3.24165463105109e-11	19.1129878263184
AMPD1	-1.77244747413592	3.73045523669892	-7.76323161270021	5.16131925419383e-13	3.25067088469947e-11	19.1057397648572
XYLT2	-1.0030089851494	5.98129715446774	-7.75051383368771	5.56847653230192e-13	3.47478067852075e-11	19.0317661339851
KRT17	2.95733695127767	3.86761209424194	7.73501656080886	6.10778120819903e-13	3.77650526667685e-11	18.9417088178876
CHGA	-2.36387704682168	4.81185096496774	-7.72511222912157	6.47919500189922e-13	3.96989952582431e-11	18.8842011776573
RAB26	-1.10768940034441	4.08454918548387	-7.71044763438736	7.07051825282484e-13	4.27419141345987e-11	18.7991231291105
CYP2C18	-1.58746226328746	4.40777730223118	-7.69797981992581	7.61503187134691e-13	4.56261710486321e-11	18.7268550526356
POU2AF1	-1.46101565363202	4.63788005078495	-7.69386965798877	7.8034740222728e-13	4.65492694870467e-11	18.7030441852032
C15orf27	-1.35449255936461	3.39431247616667	-7.66325361255037	9.36007771757935e-13	5.43969151818635e-11	18.5258863058236
FAM3B	-1.642650708968	4.42900086770968	-7.63263545782313	1.12233099625837e-12	6.49465129074126e-11	18.3490816253101
MUC6	-1.13031306891811	3.61583551949462	-7.61959323583106	1.21243116517742e-12	6.95658068121501e-11	18.2738809181969
AKR1B10	-2.2255978684612	5.85680511906989	-7.61638915035095	1.23563887502231e-12	7.05982531927301e-11	18.2554165920252
B3GAT1	-1.5681118442221	3.3398700823172	-7.59221220151864	1.42551083858674e-12	8.07650303987576e-11	18.1162217703855
SULF2	1.02058538575769	5.42583736787634	7.59111494845651	1.43478093621621e-12	8.0951536072099e-11	18.1099100063133
MARVELD3	1.39168636205051	4.04068857267742	7.58628964188196	1.47625990121765e-12	8.26034517454057e-11	18.0821589123351
C21orf2	-1.02782434258611	4.51044131448925	-7.56887855025932	1.63602781303247e-12	8.96900915638569e-11	17.9821019881495
GATA5	-1.95175868713072	3.8357772437043	-7.5552784328982	1.77261555286259e-12	9.60119488052492e-11	17.9040298401231
PLCXD1	-1.17048004012934	5.01219900413441	-7.54697864210707	1.8614491839608e-12	1.00421846215192e-10	17.8564208490501
MSX1	1.27137532196464	4.12101132491935	7.48988269815125	2.60389076541757e-12	1.36136234959534e-10	17.5296608896626
GPRC5B	-1.11506091659452	3.9765878148172	-7.48689310260275	2.64996439856703e-12	1.38012184311524e-10	17.5125878183115
CLIC6	-2.09469339416011	5.29223006747312	-7.44593368090705	3.36857050049773e-12	1.74098523462747e-10	17.2790430723883
CKM	-2.34208750036736	3.76561100133333	-7.43227806275737	3.64856574497629e-12	1.87852580808836e-10	17.2013336799037
GKN1	-3.31121399673274	5.71822491791935	-7.4272712783999	3.75688609981045e-12	1.92696949536111e-10	17.1728610632174
SCNN1G	-1.53555835029634	3.64257842470968	-7.41325871744148	4.07722519592667e-12	2.06777926509524e-10	17.0932294071222
ENTPD5	-1.01515328185275	3.87750690051613	-7.41027823410207	4.14876587506262e-12	2.09621039978444e-10	17.0763021726492
COL10A1	1.52804889457248	4.23904643439785	7.40062644484398	4.38905752885776e-12	2.19307114384734e-10	17.0215114918175
SNX10	1.05009016505097	4.62981641980645	7.38736396121617	4.74181189053056e-12	2.33486817489725e-10	16.9462870211656
GCKR	-1.05516489595301	3.47575274557527	-7.35681688215209	5.66439486231481e-12	2.77904242139872e-10	16.7733041570194
ABCC8	-1.02623084416746	3.39521407030108	-7.35600446386136	5.69121091415816e-12	2.78211866384894e-10	16.7687089095687
ESRRG	-1.3396534685437	3.63385810780645	-7.35182610399094	5.83112261243275e-12	2.83536375706165e-10	16.745079409576
LRP8	1.18369635793587	3.60211323503763	7.35150514386719	5.84200936577949e-12	2.83536375706165e-10	16.743264616413
WISP3	1.81165139976121	3.50708471158064	7.33471965400777	6.4402348666601e-12	3.10345979820087e-10	16.6484154885201
C14orf132	-1.19416724302265	4.60514787315591	-7.29494545396501	8.11008952260401e-12	3.86685641639369e-10	16.4241407223372
FCGBP	-1.59046840573229	4.85510167251075	-7.28373418600648	8.65358989239665e-12	4.11151792045414e-10	16.3610452917364
CYP2C9	-1.45918560197842	3.99114120945699	-7.26539864798022	9.62097454719736e-12	4.46156220354792e-10	16.257971298136
HOXB13	1.79390687779918	3.19908535407527	7.25500750032417	1.02158383087002e-11	4.70093776173325e-10	16.1996210433806
RIMS3	-1.02469718793219	4.17195618459677	-7.25457590304276	1.02413162965166e-11	4.70093776173325e-10	16.1971984641659
COL8A1	1.433288268773	4.83445371784946	7.2466937499896	1.07178054362303e-11	4.90303389905385e-10	16.1529696127428
GC	-2.05124001882382	3.79487011269892	-7.21789440010081	1.26523409167746e-11	5.69187203834035e-10	15.9915968807762
CLEC3B	-1.07149976713898	4.9555021877043	-7.18199067800815	1.55524726358598e-11	6.85980560137384e-10	15.7909202364399
ALDH1A1	-1.3034586711595	6.1194928817043	-7.17610048681361	1.60872086787421e-11	7.04973762844163e-10	15.7580519329569
IL1A	1.01361576432512	3.37275665027957	7.16203896275208	1.74382480596582e-11	7.49623228494706e-10	15.6796476595975
PDIA2	-1.86498881052013	4.19497995774194	-7.15749780094441	1.78980358681419e-11	7.63288616562827e-10	15.6543455957677
HOXB5	1.42469097317618	5.0847184591828	7.15262494758384	1.84047180268523e-11	7.81248547967421e-10	15.6272055347472
C1orf116	-1.27722541035237	5.2897588973871	-7.1503929388248	1.86415056846611e-11	7.88826963987486e-10	15.6147775319351
SCIN	-1.32960261716133	3.9133130295	-7.14574495386027	1.91442886395278e-11	8.05070846173434e-10	15.5889042300035
CLCNKA	-1.29506655587203	3.83334385969892	-7.12451397294515	2.16163988955089e-11	8.87058982354364e-10	15.4708420096485
CTHRC1	1.4487439258878	5.60103515719892	7.12450093920142	2.16180093181405e-11	8.87058982354364e-10	15.4707695922926
PLA2G7	1.45109861515996	4.48827746425806	7.11679713448874	2.25908888991201e-11	9.20587483951571e-10	15.4279793326674
CYP4F12	-1.32105643843563	4.79803193488172	-7.09652730758793	2.53618625510267e-11	1.01305304071815e-09	15.3155180122465
AGXT2L1	-1.79918940705372	3.67464877513979	-7.08972216344438	2.63653376546152e-11	1.04695905331714e-09	15.2778026911921
KLK6	1.83291130420328	3.84642204635484	7.07047863075999	2.94198423345774e-11	1.15806420073405e-09	15.1712637319455
NQO1	-1.11464402832068	5.7481916888871	-7.06981434923201	2.95312932565629e-11	1.15908186083223e-09	15.1675890000793
S100A3	1.18005220623129	3.77343550989785	7.04586078761329	3.38407735739861e-11	1.3055211252574e-09	15.0352131599944
ETV4	1.30000727608312	3.90011859112366	7.02018252643833	3.91503582092242e-11	1.49333802960875e-09	14.8935937162641
C4BPA	1.1355833196161	3.48826908969892	7.00306444861052	4.31380451588015e-11	1.60806579959583e-09	14.7993511681602
GLDN	-1.58622751485382	3.60601766597849	-6.99116229000974	4.61441199838171e-11	1.68419819056837e-09	14.7339032350121
DRD5	-1.57997198217787	3.71621177051613	-6.98746206797064	4.71200841802265e-11	1.70843171128644e-09	14.7135695313222
C2	1.15514588290157	4.86731867796774	6.98623354944416	4.74485951745336e-11	1.71333713935563e-09	14.7068198799569
IGSF9	-1.21253518311052	4.15568107116667	-6.98071793369324	4.89515418092216e-11	1.75823031203891e-09	14.6765248332193
FABP6	1.59082936447804	3.41124206805914	6.96522461596881	5.34289962560563e-11	1.90892358391361e-09	14.5915009120993
GAMT	-1.07990963525165	3.88585808896237	-6.95467118728042	5.67076455004023e-11	2.00568812734903e-09	14.5336491699287
CA2	-1.83388848768988	6.33098484054839	-6.94722906512438	5.91381720708521e-11	2.07458546116945e-09	14.4928838210316
TNFRSF11B	1.47324582337824	3.75985922708602	6.93108149923148	6.47704930112771e-11	2.24886473298898e-09	14.4045210440854
MMP11	1.37724130843349	4.87539322587097	6.90943105257653	7.31594696244918e-11	2.50017402679381e-09	14.2862349744717
FOXC1	1.34343714676764	5.53753485174731	6.8932075144321	8.01392298511359e-11	2.71971255993542e-09	14.1977414571622
ABCA8	-1.27188856944206	4.18044469648925	-6.89141582869927	8.09491882051672e-11	2.73349864709768e-09	14.1879759911517
SULT2A1	-1.88774532506077	3.90195358768817	-6.87824030247923	8.71583640248384e-11	2.92131536450578e-09	14.1162097562834
NNMT	1.01062388623206	5.36812432592473	6.87765735828755	8.74436689963977e-11	2.92243588506694e-09	14.1130363746546
PGA3	-4.39953869539446	5.10426481846237	-6.8726037391456	8.99559012936061e-11	2.99285714844403e-09	14.0855325931265
CKB	-1.12366393895929	5.69894159759677	-6.85854988396315	9.73222738671895e-11	3.20642557283604e-09	14.0091090281534
HTRA4	1.04070592567595	3.43568155966129	6.85057349980109	1.01764284705135e-10	3.33615702154492e-09	13.9657755211323
GPT	-1.27709115751048	4.63079110463441	-6.83761390633519	1.09411000886812e-10	3.54434058135962e-09	13.8954335874366
GSTA2	-1.54474877080392	4.32213754248387	-6.83015681155276	1.14064746543686e-10	3.6775017451144e-09	13.8549940308097
CLDN4	1.61851339067228	3.46164471727957	6.79146583686875	1.41525335158517e-10	4.46712019436242e-09	13.6455980136603
CDKN2A	1.06433818295362	3.67863023834409	6.78488302535815	1.46805791998492e-10	4.60161395706385e-09	13.6100427596118
ID4	-1.18719908502893	4.18718289210753	-6.77758393607698	1.52887862898054e-10	4.77017177765566e-09	13.5706429582919
PKIB	-1.21002306863478	3.7115599000914	-6.77416346671706	1.5582276752049e-10	4.83944058485081e-09	13.5521883638455
KLK11	-1.62630577174254	4.1531692537957	-6.77231664406247	1.57430414455295e-10	4.8781813321262e-09	13.5422264594082
ENPP5	-1.35313710955901	3.74306601932796	-6.7354191385574	1.93198572525616e-10	5.90542182972769e-09	13.3435421044434
KLK10	1.79192065761717	3.9526015120914	6.71878867610475	2.118307832853e-10	6.37422363659165e-09	13.2542058333419
ITGA2	1.14841233970442	4.47782077679032	6.70265986219609	2.31586884357876e-10	6.846982535131e-09	13.1676924958477
FOXA3	-1.17316554389163	5.32494888643011	-6.69649572907907	2.39607150415287e-10	7.05330526907262e-09	13.1346621280439
KLK8	1.87706206512751	3.54371251244086	6.68570119882421	2.54315951798642e-10	7.47004838027204e-09	13.0768645117044
LIPG	1.1815763695235	4.22756809296237	6.6609489516311	2.91482412837108e-10	8.39779436644103e-09	12.9445476378573
ALDOC	-1.36977436558687	5.03211081217742	-6.65739089883418	2.97246875503407e-10	8.52758462116871e-09	12.9255522284093
DERL3	-1.24718710323909	4.17047322145699	-6.64953123708974	3.10381063381975e-10	8.84145941357838e-09	12.8836138398788
CTSE	-1.56141136285749	5.44059744463441	-6.644834342523	3.18500910394579e-10	9.02263771475521e-09	12.8585661832398
PIK3C2G	-1.16464426439967	3.56643864357527	-6.6315375759012	3.42638691485889e-10	9.64588465989693e-09	12.7877160148223
ORM2	-1.93345374446533	3.8171866166129	-6.61150841015484	3.82433371233788e-10	1.06773820203644e-08	12.6811581109108
HDC	-1.4496705843917	4.76626310491935	-6.57605967782911	4.64307795233868e-10	1.27013976873976e-08	12.4930545430701
ANXA9	1.1195078661249	3.47200378552688	6.57371642143505	4.70290078510028e-10	1.2813275559566e-08	12.480642480213
EPHB6	-1.05461355043212	3.67004314830645	-6.56391142890761	4.96155181918374e-10	1.34908379886681e-08	12.4287359391173
NKX2-2	-1.05584445435053	3.23003612841935	-6.56296731198922	4.98718355296629e-10	1.35085046405124e-08	12.4237404310432
TREM1	1.24740750650222	3.4184138542957	6.54189616340411	5.594364120552e-10	1.49414762438648e-08	12.3123652978542
SPINK2	-1.58151180568345	3.23209889355914	-6.52750059089552	6.05040544112537e-10	1.60329824027943e-08	12.2364035507214
GREM2	-1.67044715060677	3.7112207432043	-6.52505366418812	6.13147652520468e-10	1.61351063044837e-08	12.2235021448864
PRSS22	1.00342205104485	3.9303330717957	6.49229231569674	7.32549387558985e-10	1.90392538520849e-08	12.0510602009721
LIPF	-3.62453537106444	5.45325699437634	-6.47739317137604	7.94149660611842e-10	2.04830105797047e-08	11.9728178006613
HEPH	1.28576513496893	4.14356482967742	6.45517688580198	8.95571099884394e-10	2.26671556327749e-08	11.8563601711779
CLDN18	-1.47795412814373	5.01533671937097	-6.45441697039312	8.99256583830415e-10	2.2717972764268e-08	11.8523811685368
UGT2B17	-1.33359635098194	3.91679067044624	-6.45112588598167	9.15390726003079e-10	2.30396018974121e-08	11.8351520987335
SPP1	1.76764480158717	4.74309112766129	6.44930315999601	9.24448499309812e-10	2.3224410258171e-08	11.8256123847962
CELSR3	1.06880236789989	4.40895565032258	6.44665452199911	9.377677387237e-10	2.34910695496493e-08	11.8117530836835
DPT	-1.62235768444221	4.51300261800538	-6.44177561109426	9.62797910288724e-10	2.39215532169167e-08	11.7862330569933
APOC2	1.29869057390678	3.47436532875806	6.43766346545228	9.84403404086352e-10	2.43410188995744e-08	11.7647332379952
COMP	1.2521827440845	4.05497140329032	6.4290479978701	1.03122629351146e-09	2.52510583009742e-08	11.7197166042719
LRMP	-1.15030566264059	4.56679137852151	-6.41797102334114	1.09465428367689e-09	2.66116941746297e-08	11.6618945895944
LTF	-2.06338716430139	3.81804451001613	-6.41544629277432	1.10963914918999e-09	2.69276410738021e-08	11.6487243137395
TNNC1	1.49348961130369	3.63649059456452	6.40328092383543	1.18471643975841e-09	2.83933545323338e-08	11.5853097907317
MST1	-1.11925061741941	5.55129455500538	-6.39440576759673	1.24261576119581e-09	2.96759436020326e-08	11.5390945557785
C21orf90	1.20414478979642	3.12482106783871	6.38712468285129	1.29218431844154e-09	3.07512616098715e-08	11.5012105913885
MMP3	2.1018991258679	4.96365349425269	6.35657036300095	1.52224442272718e-09	3.57935271378243e-08	11.3425354043979
LRRC17	-1.14826324949549	3.64691931810753	-6.35629276453772	1.52450891108483e-09	3.57935271378243e-08	11.3410960094849
NANOS3	1.44502650735542	4.11992004336022	6.33650518581261	1.69474216631854e-09	3.97032935538397e-08	11.2385980549789
TFF2	-2.27701579281708	6.1531079857957	-6.32469659740499	1.80508636511242e-09	4.1846431430281e-08	11.1775285072214
SALL4	1.48943289750421	4.0621510622957	6.31111625553034	1.94072650432779e-09	4.47689567207881e-08	11.1073868877447
NEU4	1.17055202761595	3.36296405328495	6.29012009731761	2.17036500838427e-09	4.91655531277455e-08	10.9991347452671
CHRD	-1.20331705748753	4.40880978377419	-6.2542479101347	2.62593906644169e-09	5.83872592753479e-08	10.8147258955272
PDZD3	-1.30590916370167	3.96716723096237	-6.24043388210301	2.82536495446232e-09	6.25135079221801e-08	10.7438948084138
IGJ	-1.70385441739828	6.27959753308065	-6.21729575607291	3.19319475480126e-09	6.94045749193642e-08	10.6254836447212
CLRN3	1.87671459682504	4.89527619724731	6.21221640102678	3.28002421762535e-09	7.11775768122834e-08	10.5995281444852
GSTA1	-1.54794917679091	4.42077392363978	-6.20846785615528	3.34558578912011e-09	7.23683341381397e-08	10.5803819897751
CYP2S1	-1.17306883178249	4.87171771361828	-6.17419802894762	4.0077648650628e-09	8.45616562338353e-08	10.4056962866829
MLPH	-1.31589661864993	6.20609297434409	-6.17412995119584	4.00920045064045e-09	8.45616562338353e-08	10.4053499022895
TNFRSF6B	1.43580743780913	4.82566405917742	6.1626505845465	4.25862584247648e-09	8.92623661087364e-08	10.3469780518789
HOXA9	1.66992723575785	3.30448226527957	6.15721971123054	4.38187229817077e-09	9.1284511983893e-08	10.3193873575919
TCN1	-2.21268323109107	5.13108923705376	-6.15466622846154	4.44102288071539e-09	9.20917164284335e-08	10.3064203378957
SERPINA5	-1.82228798028486	4.2465409070914	-6.10048534177358	5.8978134430636e-09	1.19197450496305e-07	10.0321201872082
RASEF	-1.16739624538328	4.86934972227419	-6.03045910235659	8.49032988010162e-09	1.65183271417322e-07	9.67999540505805
FCGR1B	1.06465302320955	3.61114850397849	6.00604223712834	9.63447966422433e-09	1.85841152611484e-07	9.55785706341524
KLK7	1.95522038146456	3.53425240111828	6.0029916427345	9.78763971826079e-09	1.88259132705922e-07	9.54262078349296
LEPREL1	-1.37667251537823	5.08852930324731	-6.00038876352884	9.92020544505082e-09	1.90538300611962e-07	9.52962475415848
OSM	1.47390314510378	4.35064551881183	5.97676520347291	1.12066412625951e-08	2.13430561655134e-07	9.4118476223991
SHD	1.07866658483591	3.77882843586559	5.96681233843164	1.17963161800689e-08	2.23404080271766e-07	9.36232087779114
ANXA10	-1.95938154651676	5.90060554789247	-5.94914512465272	1.29187774222296e-08	2.42289702319128e-07	9.27454431537244
DNER	-1.32516741889561	3.6838170330914	-5.9430110868223	1.33324434518304e-08	2.49702097899357e-07	9.24410969677738
ADH1A	-1.62160741815658	6.05057755472581	-5.94048351611521	1.35066458731573e-08	2.51811264835247e-07	9.23157511652256
OSR2	1.07029035553865	3.58212000597849	5.93466533379377	1.39161539165739e-08	2.58489218359846e-07	9.20273570292638
CHGB	-1.71106684676075	3.56642180511828	-5.92404264852645	1.46954133810608e-08	2.71845071848285e-07	9.15013105721358
ANXA13	1.92914139670473	3.71292177153763	5.91031928460836	1.576563258342e-08	2.89664085226717e-07	9.08226659857581
CXCL1	1.88337147591688	4.7623356561129	5.89738662973717	1.68438232663585e-08	3.08219203851028e-07	9.01841065839073
TNFRSF17	-1.68757815673305	4.27113183842473	-5.89540958459143	1.70148863302181e-08	3.10929252088371e-07	9.00865727400646
IL6	1.0840698362019	4.11904574045699	5.83026989098183	2.37077575639161e-08	4.16377101391683e-07	8.68855810596271
KRT16	1.38035295770274	3.5169825733871	5.82112353978881	2.48333948413515e-08	4.33336339622089e-07	8.64380857674154
IL8	1.62167074197627	5.34160970838172	5.80439220369246	2.70293497191943e-08	4.66935440423634e-07	8.56207428775297
ONECUT2	1.27760508588413	3.31117880658602	5.79082331020082	2.89487199678186e-08	4.94318558744302e-07	8.49590842351973
SCNN1A	-1.3780492745013	5.8327353593172	-5.77430818680468	3.14652745497541e-08	5.3192419810015e-07	8.41552079342977
TFF1	-1.74966270149212	6.51211439953763	-5.75836373586227	3.40972435574333e-08	5.70717892473676e-07	8.33806229103945
EPHB1	1.25205641527996	3.93191725936559	5.73130069801612	3.90653901958226e-08	6.40417008040718e-07	8.20693109070548
MRGPRD	-1.262525383925	3.68035766970968	-5.69411819251086	4.70607045865933e-08	7.48823737728624e-07	8.02747164414255
OLFM4	2.90879231902908	5.09063385910215	5.68017992096298	5.0452600572225e-08	7.95318584806168e-07	7.96041045659989
TFAP2A	1.08664262762299	3.6525960486828	5.67738969085085	5.11597431185092e-08	8.04592429230816e-07	7.94699970359331
PGC	-2.21354590813638	6.54904622014516	-5.67581891207537	5.15620838613348e-08	8.09979324322894e-07	7.93945206902108
MYOC	-1.48349224093755	4.05496300800538	-5.67094461162381	5.28303700466962e-08	8.25116540717778e-07	7.91604027883191
FGA	-1.12862255265085	3.92995638487097	-5.66372395049526	5.47653631537778e-08	8.50433236772139e-07	7.88138469493379
SIX1	1.31166740282718	3.18761171396774	5.65523976994836	5.71275152319446e-08	8.84304588425968e-07	7.84070460715707
CYP3A5	-1.13949655068682	6.4132366015215	-5.65503372839312	5.71861012933774e-08	8.84304588425968e-07	7.83971721056262
COL2A1	-1.26996877081035	3.74644373711828	-5.65495746852902	5.72077999749758e-08	8.84304588425968e-07	7.83935176290134
KRT6A	1.23355714531792	3.46271874375269	5.6486044666076	5.90439792387143e-08	9.08539230535716e-07	7.80891952335427
IL1R2	-1.00374542944819	4.06241382616667	-5.60121851094943	7.46781791870826e-08	1.10990609054539e-06	7.58269440503863
CRABP2	1.3820035803144	4.17569499969892	5.57911160999036	8.32902785658491e-08	1.2167906464886e-06	7.47761677293697
CCL3	1.12174434504011	4.35461030177957	5.57248896809895	8.60538247157267e-08	1.25027343398675e-06	7.44619587830904
DSG3	1.62800618019945	3.64643719881183	5.57192355315302	8.62938689857367e-08	1.25241723465794e-06	7.44351451880388
PPP1R3C	-1.04709831747497	4.62236829180645	-5.5641269417577	8.96712688344918e-08	1.29311890445991e-06	7.40656053761475
ZSCAN4	-1.14478401890938	3.24381941151075	-5.48644697314266	1.31198243542983e-07	1.78907896859571e-06	7.04040179664433
KRT7	1.7259398420672	4.25242145248925	5.47646742316839	1.37736384424169e-07	1.86508838148767e-06	6.99362961897389
C12orf36	-1.17191312521782	3.87402834054839	-5.4486216176007	1.57704989212385e-07	2.10185360130404e-06	6.8634469826054
CCND2	1.15891919205909	6.01574389597849	5.43905834534119	1.65193177693851e-07	2.18232275039262e-06	6.81884822487684
SCGN	-1.07810325124353	3.54782865616129	-5.43320266084202	1.69948134570869e-07	2.22775187824214e-06	6.79156799004595
APOC1	1.07155075764274	5.2728992686129	5.43222150631263	1.70757795550486e-07	2.2319043512641e-06	6.78699910908205
KRT6B	1.99845473309735	4.11007601044624	5.43221957791355	1.70759390584861e-07	2.2319043512641e-06	6.78699012981565
MAMDC2	-1.23107063724767	4.00185137552151	-5.42831159367366	1.74021804944246e-07	2.26797811429263e-06	6.76879800685791
CPE	-1.1757624050228	5.27424150177419	-5.42204872987038	1.79377152375652e-07	2.32631751380171e-06	6.73966345445628
TNFRSF13B	-1.04870698048156	3.96775310195699	-5.39926119981253	2.00251780406162e-07	2.55812203630174e-06	6.63386318136561
FAM83E	-1.01415076924185	4.65386943800538	-5.38690064767539	2.12545880096294e-07	2.68979790877001e-06	6.57661003206289
SERPINB5	1.32257426905832	4.42263142617204	5.3537139167954	2.493043108689e-07	3.07732878165522e-06	6.42336550574813
MYB	1.03990715176749	5.41390954983333	5.34414923336951	2.61001077093486e-07	3.1983851447266e-06	6.37932780071991
CD55	1.1706327641272	5.48374000416667	5.27019692258811	3.71352048566403e-07	4.32371288876842e-06	6.04079192102546
TFF3	1.72760943474728	6.5432264716129	5.26051920805615	3.88793822756483e-07	4.51071907906256e-06	5.99674723162299
LY6E	1.01009604276106	5.71506475102151	5.2264410462554	4.56785298843235e-07	5.21968753724578e-06	5.84213017862133
RPRM	-1.17888863969585	3.84934940934946	-5.2229586752728	4.64351659569986e-07	5.29720793785778e-06	5.82637221501409
SOX2	-1.06869968564993	3.80895689520968	-5.21355917660828	4.85387941927253e-07	5.50472204492206e-06	5.78387783615694
CLIC3	-1.03862822550114	4.24486773940323	-5.20663165210435	5.01481959535332e-07	5.64000599175077e-06	5.75259551178895
CDX2	1.34268023712766	3.97564130624194	5.1877729157348	5.4796738390476e-07	6.11204806050606e-06	5.66759297934457
CNTNAP2	1.0149817802146	4.19968364143011	5.17496303375714	5.81903364049831e-07	6.43315638514744e-06	5.60998591530359
PDK4	-1.03093093123389	4.99367679402688	-5.16742351916195	6.02822632010056e-07	6.59803609811281e-06	5.57612987534095
GJB5	1.22759733825164	3.30385591833333	5.13445252766034	7.03211504412535e-07	7.5561538692263e-06	5.42850875312054
KRT20	-1.67050451048569	4.41122623140323	-5.13431462632891	7.03663690207102e-07	7.5561538692263e-06	5.42789281545818
COL1A1	1.07841045867059	6.66045750826344	5.11954610457792	7.53760390948957e-07	8.0178078977532e-06	5.36200101835072
BEX2	-1.25113447303536	4.39941599497849	-5.11925293499604	7.54789105224375e-07	8.02244840961009e-06	5.36069444618843
CHRDL2	1.41641382098086	4.19389012687097	5.09660404834876	8.38520710219214e-07	8.74088447812039e-06	5.25992521194483
ASCL2	1.15313111902189	5.39591970845161	5.07892822767037	9.10065414033942e-07	9.36413052540548e-06	5.18151623580343
PTGS2	1.21845506778999	4.69703900939785	5.07770547750212	9.15227949375561e-07	9.410099971522e-06	5.17609979040453
PPP1R1B	1.05374255340288	4.07644228077957	5.06594010483933	9.66376726123329e-07	9.86855750259125e-06	5.12403283059693
GHRL	-1.99637362753804	4.76237251622581	-5.04782349390475	1.05060231836425e-06	1.0624500368163e-05	5.04403765626086
DPP4	1.17509312240027	4.18552362363979	5.04427983214522	1.06789015643537e-06	1.07912691106651e-05	5.02841576594439
AGT	1.00404037028119	4.7442722405	5.00610488622071	1.27252474643207e-06	1.25592256497351e-05	4.86065386672423
IL13RA2	1.15085795328149	3.60733315484946	5.00425264232774	1.28336520629106e-06	1.26477789362353e-05	4.85253874641306
AK5	-1.18645982758151	3.49316645353763	-4.99216915668394	1.35631437311911e-06	1.32797201203224e-05	4.79965430693653
DMBT1	2.00901435457646	4.59302739277419	4.98293606083851	1.41474884016245e-06	1.37820964349926e-05	4.75931059362765
CTSG	-1.17242361584004	4.54383936612366	-4.97280129558983	1.48169896942123e-06	1.43209748357836e-05	4.7150927407178
H19	1.6844173682394	5.39826801913978	4.96583566173634	1.52948358663289e-06	1.47407382538049e-05	4.68474167751328
CDH16	1.13783428333231	3.13233040778495	4.95950231528813	1.57422436938218e-06	1.50860383480567e-05	4.65717390842566
CPS1	2.34939061360324	3.89605287046237	4.92544925588218	1.83739055467972e-06	1.72778510423042e-05	4.50941035963034
ARL14	-1.09023070309138	5.20161123652688	-4.91031719125171	1.96756767621055e-06	1.82235526016191e-05	4.44400009209031
MSMB	-2.16487154279213	4.67357166451075	-4.88139878622056	2.24162550319399e-06	2.03171693030454e-05	4.31942799066575
C10orf81	1.05049073612337	4.56074121983871	4.85895005484842	2.47949688994722e-06	2.22056001235286e-05	4.22311719054196
PLAC8	-1.11067799688091	5.39197666815591	-4.83758283875601	2.72848328475361e-06	2.41164439679168e-05	4.13176567867701
TESC	-1.02166990126603	6.30690387602688	-4.8370840990774	2.73457452309026e-06	2.41545163843217e-05	4.12963713888552
LEFTY1	1.97963550449487	3.86980678944624	4.8364655534639	2.74214725681044e-06	2.42056166913104e-05	4.12699752336991
AADAC	-1.08505481014205	4.35412284252688	-4.79809486261817	3.25372583595744e-06	2.82065950990395e-05	3.96376534703459
GPR128	1.74809674338038	3.91222706867742	4.74217592574374	4.16766521870089e-06	3.48145309848419e-05	3.72769819802724
KRT23	1.01995439144711	3.67312303327957	4.72924645454124	4.41187933224557e-06	3.65389957418576e-05	3.6734235794699
MUC1	-1.07378457778418	6.55296037634409	-4.72347369128997	4.5253262413721e-06	3.72937379129174e-05	3.64922853499033
ECHDC3	-1.16768630810807	4.53048933709677	-4.71863981905335	4.62248418505978e-06	3.79351868787239e-05	3.62898645855503
CHIA	-1.699082422925	3.8304224528871	-4.71657774651819	4.66454069693231e-06	3.82108563685181e-05	3.62035638248876
PCOLCE2	-1.0250913036458	4.17668712966667	-4.61876778177137	7.14441225540004e-06	5.50298557169351e-05	3.21442788357372
TCEAL2	-1.05872153936155	4.35599269599462	-4.61261151775017	7.33714711002748e-06	5.62902600662221e-05	3.18910359918876
FOLR1	-1.05989886293403	3.98405781437634	-4.61083024195481	7.39384218644076e-06	5.66610170042978e-05	3.18178118131613
CA4	-1.05390612003383	3.8755358390914	-4.59099417861224	8.05441441505316e-06	6.08620678539257e-05	3.10039157783962
MFAP5	-1.00062451443043	5.04904519810753	-4.5474834449741	9.70840882669825e-06	7.11372099146759e-05	2.92284174012339
SFRP4	1.05989669116823	4.54470198891398	4.52996981815518	1.04626042225181e-05	7.58426786815406e-05	2.85175698948989
DPEP1	1.19975537216363	3.74461119614516	4.52465385634016	1.07024731926714e-05	7.73330787096924e-05	2.83022386871189
MYO7B	1.09177426814603	2.93862454919355	4.52273825739131	1.07901999824132e-05	7.77594986492058e-05	2.82246940483496
PDILT	-1.06906700730354	3.70668955296774	-4.50703038456505	1.15361315630057e-05	8.23036130373716e-05	2.75898226849379
IGF2BP3	1.2652026832417	4.53102719124731	4.50359336412623	1.17058406212051e-05	8.32504137876774e-05	2.74511435567492
MMP7	1.85327252577162	5.30612680506452	4.48094533906389	1.28856888761399e-05	9.04067943377259e-05	2.65394520984042
SEMG1	1.17766390365452	3.76719437604839	4.40782429567366	1.75271048062806e-05	0.000117959506054595	2.3621295613483
SULF1	1.02042116794214	5.58306654127957	4.40149383003647	1.79970539781435e-05	0.000120941989041212	2.33704827648227
ORM1	-1.26717404685474	3.69030264730108	-4.36842507640509	2.06553441568609e-05	0.000136236734158818	2.2065057304416
LY6D	1.11781546498377	3.54362915132796	4.34415645282577	2.28418488946736e-05	0.000148061979838571	2.11121227368922
NPY	-1.11511816032542	3.88253957360215	-4.31222753635233	2.60586188017464e-05	0.000165895513490573	1.98649965762823
UPK1B	-1.23816430403092	2.82692964749462	-4.29924460719093	2.74871419036307e-05	0.000173279044933456	1.93600414022659
SAA1	1.29783427752717	3.76593094596237	4.26209015057511	3.20019635689453e-05	0.000196882593678822	1.79218617817182
SLC3A1	1.28360753418751	3.67648959428495	4.20276247453102	4.07157677028462e-05	0.000241494616935716	1.56466978742321
CEACAM6	1.5067802218656	6.0538768025914	4.16416511464916	4.75578276878177e-05	0.000278297556059092	1.41806726989452
PI3	1.57333244207776	5.38552447967742	4.15255639425799	4.98220118680853e-05	0.000288801311089788	1.37419366624206
GAL	1.21126703565177	4.08345364785484	4.14620771403679	5.11034636349282e-05	0.000294966752378756	1.35024267305692
PRAP1	1.4914111406432	3.80974539345161	4.06597120817376	7.02681006825932e-05	0.000386160856876215	1.05017409282788
AQP9	1.1493683737133	4.24487240793011	4.0066327049838	8.8664043589456e-05	0.000472036667741147	0.831416496667226
PLA2G2A	1.34641565723037	4.78112869450538	3.94832689440027	0.000111147187791199	0.000570859180036602	0.619102529678632
BEX1	-1.02146459526374	3.86287504729032	-3.88117704097694	0.000143747769745495	0.000705505092469643	0.377847252970921
CCL20	1.18443560332895	4.7650883621828	3.87995086712212	0.000144420045354209	0.00070854776599324	0.373474516626186
MUC17	1.15765510358518	4.86104322677419	3.72036881114717	0.000262561225503109	0.00117765536751825	-0.185534798589495
CLDN2	1.02224007016286	3.96125562076344	3.71990424494763	0.000263011252655203	0.00117889287395038	-0.187132740799951
S100A9	1.14196606980224	5.22317334034409	3.61294613516779	0.000388450844058203	0.00164272732023489	-0.550436998064384
ANPEP	1.67693552753084	4.98211174933871	3.59025445583431	0.000421488727739452	0.00176099316949087	-0.62633161737724
LRRC19	1.01810404713608	3.80004995847312	3.51086854572223	0.000559078163011367	0.00224376923691076	-0.888563594758901
REG4	1.43674780821644	4.59015794791398	3.50249411962609	0.000575828838262632	0.00230280516801958	-0.915927546993668
MEP1A	1.51908863303872	4.15123528237634	3.42439185320498	0.000756387140748686	0.00292051276671741	-1.16836748091207
SPINK1	-1.00861779474422	7.07021604237634	-3.38995774180304	0.000851769761240294	0.00323166554691925	-1.2780715510098
MMP12	1.10230836345951	4.67492725000538	3.36568716156759	0.000925632288098914	0.0034538404004264	-1.3548069118265
GAST	-1.66576872631946	3.35075077147849	-3.32674008598094	0.00105677344003775	0.00385085283949172	-1.47692370334332
FABP1	1.19850091168269	2.86134181056452	3.28204074120457	0.00122855867726774	0.00435609139797917	-1.61552055665609
CA1	1.04945233191903	3.67445245039247	3.13445271967676	0.00199794183825172	0.00653797255480101	-2.06123361403491
REG3A	-1.13118185587953	4.68322211640323	-2.88627975145818	0.00435436130447491	0.0125238756210482	-2.76889493848892
REG1B	1.17439955578632	4.19816847793548	2.76972341064603	0.00617289702279144	0.0167920186634731	-3.08285421959077
ADH4	1.09001779081264	3.84990910473656	2.75967858994823	0.00635813460950419	0.0172191824775068	-3.10935446115511
CXCL5	1.00169980466953	5.17308096962366	2.73271055988606	0.00688065791113686	0.0184096006272879	-3.18006250594217
SI	1.26139435327598	3.78247685160215	2.585397930079	0.0104834763781529	0.0260854012562603	-3.55495273077262
XIST	-1.35451231552442	5.25364352404839	-2.43811560636204	0.0156935497311352	0.0366706396737363	-3.91040743641269
ITLN1	1.03077225437456	4.26876051115591	2.33049725799557	0.0208405045779186	0.0464681825275145	-4.15776396317436
