# Supplementary material for: HKDC1 Silencing Inhibits Proliferation and Glycolysis of Gastric Cancer Cells
Source: J Oncol. 2023 Apr 28;2023:3876342. doi: 10.1155/2023/3876342 (PMC10162881; doi:10.1155/2023/3876342)
Supplement: Supplementary Materials — Suppl 1: list of significantly changed DEGs from the GEO database (p < 0.05). Suppl 2. List of significantly changed DEGs after screened using Gene Set Enrichment Analysis (p < 0.05). [file 3876342.f1.zip › Sup2.txt]

id	TCGA-HU-A4GH-11A-11R-A36D-31	TCGA-BR-6454-11A-01R-1802-13	TCGA-CG-5730-11A-01R-1602-13	TCGA-HU-A4GN-11A-12R-A251-31	TCGA-HU-A4GY-11A-11R-A36D-31	TCGA-HU-A4GP-11A-21R-A251-31	TCGA-BR-6802-11A-01R-1884-13	TCGA-HU-A4GC-11A-11R-A251-31	TCGA-BR-7717-11A-01R-2055-13	TCGA-BR-7704-11A-01R-2055-13	TCGA-BR-7851-11A-01R-2203-13	TCGA-CG-5728-11A-01R-1602-13	TCGA-HU-A4HB-11A-11R-A251-31	TCGA-FP-7735-11A-01R-2055-13	TCGA-BR-8060-11A-01R-2343-13	TCGA-IN-7806-11A-01R-2055-13	TCGA-BR-6453-11A-01R-1802-13	TCGA-BR-7716-11A-01R-2055-13	TCGA-BR-6457-11A-01R-1802-13	TCGA-BR-7715-11A-01R-2055-13	TCGA-IP-7968-11A-01R-2203-13	TCGA-CG-5733-11A-01R-1602-13	TCGA-CG-5734-11A-01R-1602-13	TCGA-CG-5720-11A-01R-1602-13	TCGA-IN-AB1X-11A-21R-A39E-31	TCGA-CG-5721-11A-01R-1602-13	TCGA-FP-7829-11A-01R-2055-13	TCGA-CG-5722-11A-02R-1602-13	TCGA-BR-7703-11A-01R-2055-13	TCGA-IN-AB1V-11A-11R-A414-31	TCGA-IN-8663-11A-01R-2402-13	TCGA-HU-8238-11A-01R-2343-13	TCGA-BR-6852-01A-11R-1884-13	TCGA-RD-A8MW-01A-11R-A36D-31	TCGA-VQ-AA6J-01A-11R-A414-31	TCGA-VQ-A91D-01A-11R-A414-31	TCGA-BR-8372-01A-11R-2343-13	TCGA-CD-8533-01A-11R-2343-13	TCGA-BR-8361-01A-11R-2343-13	TCGA-BR-4367-01A-01R-1157-13	TCGA-D7-A747-01A-22R-A33Y-31	TCGA-VQ-A91A-01A-11R-A414-31	TCGA-VQ-A8DZ-01A-11R-A36D-31	TCGA-D7-A6F0-01A-11R-A31P-31	TCGA-BR-4369-01A-01R-1157-13	TCGA-D7-8573-01A-11R-2343-13	TCGA-CG-4437-01A-01R-1802-13	TCGA-BR-8589-01A-11R-2402-13	TCGA-VQ-AA69-01A-11R-A414-31
PRKAA2	8.68597046416	1.16776275863	0.22557691155	7.135330468	7.32335200062	9.64833538556	0.271375195007	7.50533397124	1.36413742445	2.88737351476	0.171442994193	0.460854156031	7.18372728857	4.69326641621	3.01746753195	2.00091075387	0.562289498702	1.23417698429	0.429210788665	0.654800652179	1.85148280035	0.373702680952	0.120820316057	0.21068119093	1.68965234583	0.859121724056	8.80712475049	1.60207626258	1.03711262743	5.33959918239	2.29471106499	0.0543619432048	0.0720182762489	0.207362781844	0.0306836086622	0.0133517289324	0.127857384425	1.74288730243	0.0473693367286	0.0574115053852	7.92243240283	0.0628489691519	0.16492563642	2.37107999673	4.67869664911	0.0965424042732	0.0780947238249	0.0624067840349	0.00260686630415
ADH1B	53.8950330679	10.1009184399	7.97155709632	14.0652117336	36.7090434502	26.5402625878	18.1307291834	38.7037425078	16.9834853418	53.7310797084	14.0829816227	6.346246865	23.8796789527	17.6873783246	28.3497544229	3.15492371896	11.9382025081	16.6831371672	9.36003056476	22.9758369843	6.20167875032	2.97162233155	25.5115707749	4.30451318277	10.5060791849	6.37917942048	32.3046942087	8.75388555301	7.51581007585	8.06299009103	1.79381412367	5.47161457617	0.938438243472	0.527425510544	0.0955723797114	0.0159529011386	3.65009968195	0.793561251494	0.0308715216375	0.785981574367	16.2510863911	0.0485217280824	1.02779603656	0.520439104839	1.9957000637	0.14976682532	1.5131200529	1.02153802533	0.110261573968
PGM2L1	1.27117603805	1.06299377672	0.555867907232	1.14728158156	0.821804111608	1.68674513276	0.414888295085	1.21233445688	1.17430565591	1.095144339	0.85608270856	0.827125894483	1.29601431755	0.675731551945	1.00091300169	0.302709351313	1.06734942391	1.3416217459	0.585708053819	1.27442112728	0.741843222874	0.88391622174	0.569490166995	0.660452654148	0.469998715444	0.682079895434	0.72543084696	1.03340861117	1.44608239242	0.766362427567	0.197409834608	0.452989778435	2.26889270906	2.10879697909	2.46191945846	2.11575477961	1.13601334383	4.08533720118	1.66087479679	5.19310940425	1.39348079957	9.06111364227	1.28910732701	2.57205290098	5.84980192876	2.45058579305	1.50424308192	3.23479939944	4.68063199586
CHPF2	7.43553540282	25.1127040951	9.90306466364	6.30254566804	6.96935216312	6.97208948074	5.71529059565	5.63286411791	13.4713481333	12.7522421507	9.96021824001	17.2701311779	5.03235628556	8.21665923331	7.0353277631	5.97032105853	11.7240776134	22.8435101663	18.6014615967	16.8816268534	12.0349669039	15.9423577324	11.6123175716	21.5858905553	5.89593184228	8.95766870395	8.69414307482	24.6928100727	27.1235324003	7.58644027331	3.96418927073	11.3257570896	16.0816815901	15.2790239721	16.4966538871	30.386444179	9.86298654137	16.009120387	15.8602083897	14.6044378794	8.73706207745	35.2475448876	14.5970505281	17.6599803569	9.59370205066	16.5610151209	14.0714249178	11.1637277217	12.250303306
ENO3	0.637635579695	0.54349637442	0.759123935151	0.734299513552	0.684428099281	0.733397004654	0.184343707345	0.589963211346	0.691298098752	0.632078781604	1.21122757772	0.684307748845	0.401249160818	0.689454135615	0.312383415026	0.355464848699	0.737049457672	0.458843064828	0.372861120508	1.61526055618	0.202402373625	0.450090207179	0.710535844421	0.891309294702	0.351214832688	0.271964782833	2.24655830733	0.593088718309	0.57558093576	0.29347098082	0.206162425628	0.825951234748	0.974055970909	0.733607821408	1.30285036006	0.606225110836	0.591363241735	1.53804583066	0.882206238273	0.181629926358	1.08539054403	0.692768633542	1.42360690233	1.89324511689	1.44211433801	1.45558770461	0.671599675147	0.827391527337	1.92315852236
TPST1	5.58615030501	4.64062288928	2.16162274944	3.13445791184	5.66687321362	4.15348305843	5.15572728977	3.95120411768	4.31134911436	6.08486528611	1.98760712527	3.34951808509	3.76779041541	3.9243989657	3.32356611468	3.71032465089	2.96703443603	5.62949777621	3.27599758193	4.80602189611	5.57522188325	5.03044543242	2.81799444703	2.56398064022	4.78112288612	1.84521871305	6.30453612527	2.63131182421	4.8775764555	4.91284333808	4.99089070527	0.890643225812	2.20840110978	6.15451406751	3.32659494813	4.52775451266	1.5690875543	6.78422921342	0.57524472962	4.01257404089	2.50870696414	8.77352614735	4.69223945404	16.1960843605	56.3416312123	0.819878641028	2.60629368883	1.10982890079	0.326996919278
IL13RA1	30.2214637309	23.0658346598	19.290895937	52.2566178498	25.743077219	32.7720969718	15.9631095352	31.3677340127	22.732644522	35.586911711	35.1950781814	12.5689013492	34.7647545523	29.6760239557	24.6090584868	35.4226023967	22.8183789857	33.4767576143	24.813551173	18.7718627272	28.7014020304	16.9745708487	16.4371900007	19.4753762061	39.4704141529	13.3494150036	25.5891398853	23.505439888	25.5636967875	37.2905347251	38.8654109408	36.3016054191	31.8729040268	33.9094264833	35.015458134	34.5676613262	19.5864645316	79.5939041492	19.6062011731	45.5711571659	42.8781276136	64.4536022145	16.6651075737	10.9146798649	24.7180066122	17.2761092501	21.4908150395	22.6929773085	22.3823215445
PFKL	8.23210624803	27.1814720294	34.7080959186	9.9213236671	8.04644913505	7.48155241324	8.23246655277	6.64944455484	15.8127128885	24.6122291483	32.296038844	23.3780623111	7.0916642274	13.6389651616	13.5654673472	21.0631583024	22.4513236813	37.0983819449	35.5303723805	18.3790526573	18.8704364252	25.7207826657	32.2342216934	36.9714646396	23.2809953255	15.7882308796	16.1434109375	37.2300829926	36.660315041	20.5173171362	15.972987244	43.1317318329	25.4805233762	20.0531567002	16.0840936611	39.7417786695	32.4757431759	26.4994353534	25.5168175884	14.2667202891	8.8945406157	15.3383781771	31.6925455485	39.4133712258	12.3941828211	19.2972376751	18.9557631815	13.3741317872	23.7740555711
SDHC	5.89895322353	3.78896808596	6.35284210123	5.6203921455	5.96955360147	5.93470805244	6.51187419907	6.11163127466	7.16155573956	4.30917866227	8.19204509385	4.9847398379	6.44366268221	6.52739299334	4.92857552471	4.86098628872	5.63492271299	5.57273975402	5.99386354698	5.83555662178	4.88447607224	5.4813876245	5.6312563176	5.82077157042	3.54691354446	5.08240540855	6.19880821264	4.77549101853	6.98929377193	4.29441436247	6.77505451205	8.04409337212	4.31251433718	5.30666249976	3.65757536993	2.42184191779	10.9762699175	7.9525190321	7.76227842485	6.20512590396	3.57222307624	4.44238351319	8.44395762127	7.73649598886	7.81840584777	5.28393692801	7.11507774488	9.36849451972	4.18465004265
BIK	0.586691785453	13.9096949457	9.08436136888	1.14789978156	0.401264389915	0.216984087865	25.5639716174	0.182194365086	23.1306966934	4.31592797415	7.23590178492	14.6638698359	0.180709485649	0.14577820227	4.5129550629	4.27382405237	7.09877986243	18.4023512915	5.56802096101	12.9483255702	24.6507482583	18.5089786487	10.2777139372	17.1210230411	5.34442010561	12.6723866369	0.355009232344	10.2104088383	14.2718176118	2.49944721607	6.97863613972	5.96084941221	41.9763419613	6.32904629549	9.74127358071	13.1925169203	32.4058856404	9.89995439712	8.77760180921	11.7610470239	3.98686540242	2.3133102995	8.4126505278	7.75361057933	7.75769073587	43.0456495788	41.6409368362	47.0126413336	22.3120620154
KIF20A	0.118957957828	1.33739359332	0.791824040271	0.134904257095	0.0834408368343	0.0261225158837	1.29934834449	0.0548355324427	4.44721530414	0.458787463617	3.41358898249	2.38175325902	0.0843023675865	0.101790605764	0.303550014086	3.84428639306	1.42997655029	3.30278901388	1.45415275077	2.0803389299	2.10609621992	1.42935237742	0.44416779826	2.78973790478	4.54137713688	2.15514674374	0.387167203855	1.74269417134	4.6881524889	3.08153119083	3.74282138978	0.862613729396	10.4473905511	6.40774851654	11.714927579	8.27249578654	15.1620811021	10.0632318635	6.29626373749	4.62192330576	1.50253068333	9.31180753331	6.47879527339	16.171077661	12.3446109103	10.0876683906	8.4150485825	8.11177821689	12.7375485518
MIOX	0.0573470416827	0.11239816018	0.0345546710114	0.0	0.290345943198	0.0127929866206	0.0	0.00805638594685	0.364866205181	0.00609077998294	0.15626036155	0.131881279997	0.00599304495487	0.0232060066977	0.00969506274615	0.00758458842376	0.0742745388222	0.0283583408663	0.0468971963786	0.199874537653	0.0	0.128048253342	0.0898944667834	0.129091566878	0.00635846520001	0.174980939169	0.00554047881605	0.0457205398912	0.270462976933	0.034718997378	0.0794641435086	0.0404471537335	0.121352163572	1.23533702768	0.462891020963	3.52910505347	2.04952919311	0.156933712118	1.57745454014	0.646253750844	0.147166949879	0.0251794268223	1.24449542363	0.128169745195	0.931197213007	0.0247286588477	0.0329786032019	0.0541715903733	0.108617494027
EXT1	5.27569165651	5.73337577063	12.7027702449	6.88625948952	5.45994528957	5.01888611658	3.29074000245	6.03972496491	5.40726115863	8.64348476962	16.5424418378	4.05149430772	8.06390438497	5.69557450022	5.11807544715	3.47543060642	11.1959687311	7.73507442174	11.5203474595	5.93440106994	6.79604966594	5.30392015571	8.1840354485	7.10166436021	3.56654523699	3.78574977703	7.0150940574	6.04142701589	8.14378759195	5.08429918735	3.16807360983	13.8898819995	9.15347940258	10.9874022062	7.94973924481	5.18070818986	10.4984279405	6.64650856439	7.83527056015	16.6971090741	10.897902674	12.3987732051	13.6969663538	25.4663815307	7.60950810087	5.41132167114	6.30122006321	4.83831363274	4.8007692881
STC1	5.69536310645	4.2491507246	4.26299202311	3.44020804509	8.51297011341	4.68495265344	3.20212587718	3.09333375401	6.0500407897	6.37781147617	1.35282530414	1.92957983272	8.51689544227	8.05298957257	5.20817181751	0.850344056291	5.25449333929	4.41104229543	3.16690019102	3.90965723878	16.4339770837	1.81806916039	11.4620705303	1.48083490817	2.93133061621	1.55818167585	5.14683106784	1.84059058495	5.05437128692	1.24139536598	0.784276047169	0.798391134636	12.5452063396	30.6118641737	11.2519616741	8.69438264354	6.88934046192	3.90792037435	10.7733579504	6.58450095324	3.54358790319	26.158930194	11.0523679392	5.88936426625	2.32060647392	3.76439047251	5.88155782031	3.45294600186	4.82520585752
NUPL2	4.17548460252	2.42482997818	1.74126733148	2.95303810535	4.69784967554	4.8310021175	3.94906922218	4.86838213395	4.95302112888	3.24713626678	3.22314988809	2.96209100471	3.37746380494	3.16610154901	2.55641439662	2.13096012657	2.96806520427	4.23068859774	2.28284581364	6.13056546128	2.53159896387	2.8760001374	1.97632392699	2.30335013677	2.85625868556	2.12855878924	2.87170910251	2.34154928098	3.25826381936	2.78213838705	3.36690631685	2.4425115286	3.19484724911	2.79949319533	5.70111840474	3.7258800812	6.4343091486	13.4650918439	5.30193329591	5.11450717679	5.27443179862	5.23846844416	6.05976744042	5.15904067407	6.88071982299	4.60470358928	4.522031711	6.17825375219	5.88112978968
ARNT	9.69617122218	7.02906707226	5.90505175946	7.11718878693	10.0861736657	9.02158039576	4.08796410806	8.66690569883	7.43084208949	10.6351786035	6.78248718247	5.95418477281	9.2206730787	8.03795860801	7.4876237267	6.78378346001	5.45731245809	8.14207019195	7.2817805574	6.78999816319	6.77944718846	6.46230214788	4.48748812528	5.27494372655	7.53784144416	4.49226694552	9.95833554291	7.8383922282	7.89351523001	8.67577232492	6.41747349758	6.265410607	8.40766174407	6.22881538645	6.26084157675	8.82959096091	6.29354755388	11.8087560652	8.12299664249	9.66668140414	7.93523696869	11.1754341597	6.69446912198	11.8505518236	12.4734471175	6.22522607611	5.85387414822	6.89078259166	14.7763507251
FUT8	3.03715312858	12.0852440368	4.45999717451	4.15770402277	2.77074966834	2.21017365061	14.0969971696	2.68653296055	12.7881248305	7.83365940228	6.51244765109	12.260093211	2.93185126098	2.37212031369	8.12142383026	1.00232939685	8.34513877271	17.5042465668	10.9998424043	14.2183437242	1.67176519049	12.7447152795	4.38299182182	8.47804048621	1.25958728148	9.29395775007	2.56638948058	13.2853243544	22.3735693923	1.76456246829	0.660335172237	6.15189375985	11.7165793845	7.58458734384	7.78174089834	5.17276867171	7.13620024899	5.01047304774	7.34079076257	10.5724810216	4.85722321555	11.271814695	4.95322100036	4.20875009559	6.99625910655	16.6072456427	6.78340662931	7.16259193509	41.1335908921
PPP2R1B	2.36468770857	4.63279644194	4.32666645989	3.12207876334	1.9322004045	2.70449067571	3.7627284735	1.96153336388	5.63419058106	4.2681793314	6.18680745939	5.02619968267	2.46823913195	2.15418965904	4.12506453062	3.80684036896	4.72731544568	5.60348436878	4.6542303706	5.62233392531	3.22080979761	4.67478258423	4.71964975897	4.34284585736	4.60700703666	4.51623423302	1.69843048316	4.03238833076	9.68405108128	5.66579731534	4.34948881498	4.07320172591	7.07035266354	3.58627286257	4.93821601039	3.53272342785	6.51183113111	6.14787325574	7.98030549414	10.1440193745	3.17115212201	5.38864838485	8.36938470923	6.48445072125	11.3528201208	8.88694027706	2.48552665489	10.0911676917	22.5575946858
KIF2A	3.62754960311	3.0116093733	3.77638980816	2.59700102793	3.42252223953	3.77081185818	1.41562503792	2.92779933161	6.1540155185	4.0305347411	6.0801356504	3.55238553989	3.94782232968	2.2611225177	2.8157354081	3.41546694773	4.0995509205	4.58391334119	4.49306707357	5.78991402622	4.1465271449	3.13120089968	2.60028208214	4.16443337666	4.9444352394	2.266384876	4.30210404363	4.17966564383	4.89559840246	5.70523742486	3.81457184378	5.35617239486	5.83116164288	5.92751291631	5.91459701539	7.34030875376	13.2914276997	28.9820126158	10.4654518706	6.29218212806	4.15236450539	4.15374044327	4.45538814211	3.50786148669	14.7003660278	11.3496981513	5.1322369813	12.5283547103	23.6720895951
HK2	0.863793868331	5.85154180173	2.01613741093	0.917035757495	0.289509634523	0.329638810264	1.39173824437	0.157482151154	4.29854320971	1.80212760695	8.79104910851	4.97622170657	0.457946117192	0.229100637802	4.99628279753	8.90905968483	6.91057672264	8.27582184802	5.04660441505	4.79131139888	22.4547866924	5.62800791382	2.60623455959	7.89523512109	30.5438312918	5.44160710891	0.955030899243	8.00964446319	13.1759867289	12.7630973456	13.0479284969	2.06524874495	32.6184296818	14.8475095485	19.4758423669	38.6631996994	14.9891698577	6.83740961986	17.9285710268	7.73613560451	1.84700103958	23.323316073	13.4454260505	3.2285460001	12.0680316051	26.366361584	16.6371542217	13.8983093221	27.1693164725
DSC2	0.586356068028	8.01927594292	14.6258573622	5.36465997123	0.181253225296	0.359380443643	5.33768488611	0.156727998344	2.00258421989	2.4325682141	23.657844362	5.1963036607	0.162701166776	0.106685227892	2.55463453529	62.1866946579	8.68343352901	10.9183211284	10.8753679741	2.38305672484	60.6774089512	4.88912265535	12.7737551332	9.53931478	86.9856522136	4.73229511228	4.46257241474	11.0151428151	8.86835723975	105.926924018	99.2851203708	24.4171440433	5.56398791589	2.57525175669	4.62411721508	11.1555848387	12.8793827026	2.5169617215	14.3192240665	9.1301391218	3.11134200863	10.0700020019	10.4397950843	5.58688925122	4.79859807716	1.70049324775	1.98533092879	0.477770569142	0.143891181057
NUP88	3.69924784968	7.14326330274	4.71254175158	3.88186698352	5.32559029897	4.12738382623	7.6283206626	5.18750904169	8.86413674923	5.44265840522	6.29071432606	5.69105339495	4.28181892789	3.9100996199	4.45339978562	5.46008990496	6.11226260965	8.57838918424	5.94502429317	8.52683504069	5.13228605555	6.13381609668	4.64569080032	7.14398924767	4.8707813187	6.56381087653	3.9171248023	6.90229880843	7.98793696651	5.8633316855	6.25973311756	4.89593007858	8.42466671498	5.42559126057	9.76992593163	6.86701940896	25.7439241499	9.26377271847	12.4658045864	8.3181398097	6.7276200807	9.0504296339	7.45040986348	12.1596966305	14.1864482183	17.7712206303	6.97761793207	10.714268755	16.5957333878
SPAG4	1.11008950763	11.7956070791	4.22507984077	1.54650456434	0.519909345788	0.989823072841	4.35632709839	0.633030525774	13.5626885766	3.19380924798	2.05829177771	17.6375197841	0.571811401757	1.02334345607	1.43807211966	0.571634176809	6.21045040555	7.75342359232	14.2885707966	14.7235704339	1.03142926909	16.5499623553	4.84511556138	9.50940925072	0.9023684015	9.56025323587	0.293190266491	7.84482820712	16.1772599957	0.272804521898	0.522448363518	1.9976849229	2.64474826489	8.78972940849	1.35642616927	0.775929170256	1.27547254162	5.28474275556	0.779248658667	3.03160528194	0.383488163592	3.13426535778	6.60512564309	7.07534757778	7.47318398855	1.40111403476	5.76430649752	1.2813032148	0.593286693658
ENO2	11.6066033882	6.7220920284	1.85557211153	12.5729666987	13.6059866321	16.7155774974	0.731568784872	14.361112979	5.25120775951	12.5667374205	1.27365204628	3.96147829185	14.6128270943	21.9277555954	4.61237684485	1.67370482261	2.42159732433	5.16731674805	3.04957755848	5.39803652351	2.10693943028	3.21244682259	1.23196646497	1.98352011957	1.95798546331	1.69890393476	18.6764480559	6.71336869321	2.43143210818	3.26560677062	0.886776035114	0.678748779307	10.0664236597	17.9218187554	10.257700243	29.3632027341	1.39374006667	13.7774907133	12.5959000478	3.27369262601	8.04172329323	8.97895654914	2.49132910278	8.18929524388	5.21006291141	0.657043334515	6.22134172328	6.63614003332	11.5258802995
PHKA2	2.10706621383	1.64701252062	1.98985765367	1.42506567453	2.03486768148	1.63879447968	0.686427991665	1.35093519796	1.8930557787	2.87863119483	3.27846038267	1.97273011091	1.56165648998	1.64945557526	2.1560513844	1.80589646788	2.12327665071	2.0382409618	2.23262996462	2.59172236972	1.65814620963	1.32192767857	1.50799154475	2.27252056584	2.81542613681	1.17346836309	2.32759755256	2.12356184871	2.59003936071	3.04283460844	1.58698053105	2.94627299415	2.17687348734	4.48782079447	3.90554793155	2.59932461456	1.91772104701	4.98641042042	2.5310494613	1.94550749546	3.15423645738	3.72886981409	2.04765512481	5.89950474611	5.09984893244	2.01838514263	1.09988091665	3.13028876046	6.81116738572
PRKAG3	0.0573716140718	0.0	0.0	0.0273432436469	0.0469221338318	0.0137829657892	0.0395522491464	0.0433991276561	0.0382181724617	0.0262484483488	0.00801678548131	0.0	0.0	0.0125008962295	0.0156679658297	0.0	0.0	0.0	0.0	0.0	0.0	0.0	0.0161418178707	0.0434628925676	0.0993324239584	0.0	0.0358153567617	0.0	0.0	0.0112217131297	0.0	0.0130731412307	0.0297143051992	0.0	0.00890556467617	0.00624335495071	0.0637727373945	0.0978872357085	0.0	0.0	0.208103954771	0.00339099059484	0.0072869571113	0.00690440499013	0.070321784947	0.0	0.0177653183415	0.0	0.0
SAP30	16.3633204668	18.8443273664	4.18436123723	19.3966696873	20.8979572044	18.9118527379	34.0906678339	21.0790943907	11.6525305199	10.3009301332	5.29497141728	8.75659727961	19.6515576219	13.0085841424	7.71682926126	4.53032063271	6.02019252264	19.3822957968	7.86972851957	6.57780289513	6.18907570146	6.533371108	10.4643818185	12.6023686232	3.83255526527	7.48251825589	10.6970024502	6.99835991289	7.4019277192	5.42302322318	3.84905047121	8.1118115051	9.42642211204	12.1682378414	6.64302051275	14.334203768	7.98325364741	9.75471921707	9.32773359438	16.8641246203	13.6911531785	7.69977334563	2.41106641378	5.87689353174	4.08516296462	5.79832097403	3.84393935281	11.387607	18.1406849361
NUP155	3.76883930976	2.21065811127	1.86523367111	2.60520346841	3.90074675106	4.07240959579	1.63530751066	2.51680345195	2.99666519504	2.9346912362	2.64732177794	2.2934230295	2.9808612418	2.18930187307	2.48370433829	2.40924907194	2.53869502594	3.93492839522	2.18634157249	2.74100662933	2.83463975988	1.77842423246	1.08803276787	2.64919440148	3.834224071	1.82828562605	2.78809279541	2.84148723508	3.42718953748	5.28801202262	2.66175360337	1.75765903636	6.18246396343	4.78724093594	17.0392635912	9.32328180712	4.4271492927	21.4136710833	9.01777977702	6.51247972869	4.20814911421	10.4912878509	7.97807602161	9.16358567794	7.93444109144	8.2895956739	1.70852476657	6.44100972271	14.8412665142
PDHB	8.18497327981	8.56388569303	5.94025342275	7.83545287007	8.70023434611	8.47542821896	13.3628409914	9.28524014182	11.9242225928	7.27491438297	6.07144628673	8.63678396575	7.50273833659	9.76344642189	5.99852461832	8.90030950468	7.90225846614	11.2689405408	8.83283225275	12.7423831345	6.40662549098	10.1214204026	6.16472803943	8.28205734959	7.58979944245	9.06087434336	13.3681546759	8.54738562974	13.3931424811	8.3017045823	8.55034858006	6.78536031783	8.79993211592	5.40767612023	7.54920268278	5.9727729503	16.148083166	7.56341940625	7.9218763527	9.9305983614	7.1863459263	7.0992318315	9.65968581716	12.5808182996	13.5956464652	9.12043126069	4.43667201129	9.17335073438	7.51648256365
POM121	4.8161539294	5.1655396099	5.63925054004	3.61843848381	5.20116338085	4.3521917621	0.61422565042	2.97870721265	3.78436728376	6.01079245205	5.00162854985	4.29731565826	3.85193781485	3.50499064467	4.06323218593	4.52399772747	4.83111831449	5.39806302015	6.32005373456	3.36241800097	4.84191669394	4.46509552376	4.75412965767	5.93371056329	4.94951165711	3.07162630907	3.59651647683	5.80617341256	7.14843317261	6.93387087453	2.92642282536	3.31190947399	6.9655885802	3.80085857472	7.35880294778	8.59994620813	5.46861124749	10.7791557217	9.52962656441	4.09011411631	4.34935873148	8.22766867986	12.2871102431	7.29459666187	14.8345163287	13.5351180407	5.45138795571	8.05320091024	14.5446283523
GPR87	0.0519915632822	0.0924662786144	0.0365489924243	0.0306789077297	0.0818941992908	0.013531333316	0.0	0.00852135992965	0.0321603702643	0.0257692363943	0.0157408497024	0.0	0.0	0.0	0.0	20.031764582	0.168345623075	0.0	0.066138488179	0.092492001155	18.0478011357	0.0	0.0211294938284	0.0682710406692	19.7122756515	0.211519950696	0.802853883184	0.0483592989662	0.0572145472994	18.6698729844	39.4196438261	0.0171126238175	0.0	0.148659009657	0.0174859556127	0.104199314457	0.0704345096533	0.0436818775902	0.00790756997107	0.0	0.252948612028	0.139821446117	0.436389168302	0.0271134113511	0.101255639621	1.83962969028	0.0581366032103	0.0143245253696	0.0359019838178
TGFA	0.35872397773	5.28315389111	4.83301694565	0.928916280731	0.147097690828	0.194438961669	5.40036432127	0.201164531952	2.5673863991	2.1225662579	5.04616182523	3.45528422134	0.151812535105	0.0839774088838	1.32267769996	14.1736044848	3.56329646701	7.4538191448	6.31889088356	2.66265464952	11.6381299756	3.56337932396	4.24707934836	3.50949327327	12.3770145118	3.45555749395	1.75435471679	5.43511554468	6.48209315929	7.1640143179	12.0949069701	6.31144460831	6.68301366819	4.7755774748	4.17777988855	11.0388855748	0.736324227788	2.30152358147	1.09840496619	8.92177323698	2.21680040753	2.66066837946	4.31019475428	0.788490562221	2.53522102177	10.5833943004	1.43608538234	5.54288995603	8.30344959123
INS	0.0189608407331	0.0	0.0	0.0	0.0	0.0	0.0	0.0	0.0	0.0986769148783	0.0	0.0	0.0	0.0	0.0	0.0	0.0	0.0	0.0	0.0	0.0	0.0	0.0	0.0	0.0	0.0	0.0128230669506	0.0	0.0	0.0	0.0367828870468	0.0	0.0	0.0	0.0127539315422	0.0	0.0	0.057349351661	0.0	0.0	0.0425760054741	0.0	0.0	0.0	0.0201419957915	0.0	0.0	0.062688257932	0.0
PKLR	0.151744665791	0.094242341589	4.48028103392	0.0994896587568	0.21910139243	0.0	0.0629618022604	0.0442147262354	0.0	0.668543367417	2.03165187018	0.0	0.0411134787584	0.0106131876825	0.0133020112239	0.00520317830751	0.844377404783	0.0518783602708	3.66765453603	0.00856986892727	0.0282402024478	0.00878436451495	8.48296716665	2.16970478448	0.00872406684432	0.0	0.0	0.0	0.0	0.0190543374457	0.0436111846422	4.11218703484	0.151363626485	0.0862689673266	0.0340234751303	0.00397542883989	0.0761381445068	18.7611094728	0.0102574895423	0.00661705834758	0.656236429676	0.00431839673155	0.965107089742	0.65065973321	3.30753420884	0.0904765394254	0.0603306048899	0.0557441804682	0.00931421978955
GOT1	13.4328482924	28.1666409636	40.8614116592	13.8989310681	14.2268873342	13.6776659776	23.8682893604	13.7410303662	24.3754909335	15.1088732523	37.8701271528	31.4834564989	13.232366354	15.061847159	22.462196505	24.9510430661	33.0819706399	24.9264980634	42.5538143417	27.5821090007	19.6803512656	23.8513326232	44.9509583916	41.235835305	22.3402261523	40.2648383374	17.0401631632	22.3239212359	41.0976463246	21.4590789408	21.8786554485	36.8609729247	43.305245936	21.2051541775	35.5134276098	10.2917456554	53.330004264	23.1817561902	26.4885195229	18.1238825908	10.8903239349	10.7971854451	32.3929533454	24.5482074764	14.6694221825	36.5280785187	39.168730559	30.313496765	25.9036367897
B4GALT2	12.4043710128	13.6409543272	8.43209091528	12.7228203819	11.184045679	13.1449226322	7.98824360882	13.2417595817	10.8097040922	13.3025928887	6.87330962641	11.0517351755	12.8779732076	18.3897308438	5.78410733382	9.14748817852	10.06389058	15.2623708417	11.3136792451	10.4030802157	14.6660273115	10.8280753311	8.27036508821	13.3380473336	6.37292851693	9.3432293174	19.6877183865	19.62509327	12.6901753232	9.23427395438	7.08290960923	4.51034232086	17.8594633094	12.4119362387	9.36179149744	16.4696178057	14.8105673451	12.895515615	21.1764430331	15.2154344782	13.4976321745	13.7722853514	20.4334526422	28.099762322	10.5914004254	13.9721730111	29.5048686553	12.1034872041	10.4468605231
PLOD1	18.6160385572	18.4960515615	21.271946408	20.555597668	16.8919485796	20.0761060446	6.82264030631	16.3187246172	15.1096673721	26.2783725667	19.0813538899	13.5793096911	17.597932145	30.1825930852	12.6043032326	7.85820957952	13.0567219773	18.8951056604	23.5952724032	12.5927909246	10.916213098	15.2250143438	18.4278775419	18.0151042705	4.95645230821	9.24062874834	28.2323054699	19.2397016432	19.4117989281	8.26090771359	4.3512772561	31.0207833755	44.4202253903	34.0101782269	24.2756798667	32.5063702313	15.0571328879	17.4917247359	28.0049979484	24.871537211	14.0726182785	48.3716573091	35.7273877582	73.8694087668	17.4576280937	24.2600042801	30.2085658392	21.5066916055	31.8535654472
NANP	1.25830338209	0.927968485596	0.782797542085	0.844339419055	1.3944222826	1.48672964643	1.10610099779	1.13520249973	1.18014928844	0.631947617181	1.2103101215	0.812633550125	1.35765750996	0.820101681701	0.746744843	1.33676266265	1.0624460448	1.33196446695	0.970328705292	1.03010516322	2.36868616324	0.806419731514	0.914143777141	1.1039706285	2.2845368756	0.88340528349	1.04929177109	1.20146750741	1.49149590457	1.74922086407	2.15300519277	0.960266855883	2.27925212167	1.87349907197	2.36939991979	2.6885612633	2.31310909855	5.48617053811	2.2423586334	3.73214777394	1.58360399776	2.58396562935	2.16347991882	2.95290288889	4.54631877158	3.41722117648	1.43441948781	2.13532273941	0.670515738544
LCT	0.096065188822	0.0102169802451	115.187329487	0.63474734624	0.0686202761595	0.00348864317805	0.500558755899	0.0	0.00552771623735	0.157790598343	20.8616903653	0.417182179615	0.0130744108581	0.0	0.0978220937757	0.0	0.376157635769	0.020622160217	1.38119577697	0.00681321495645	0.00280643979686	0.0104756147738	8.12509243799	2.18260008427	0.0	0.0136334981887	0.00151088672239	0.0	0.00210729038468	0.00568071539244	0.0130019072343	31.8764841519	0.0782190960185	0.0302583228856	0.0255465935173	0.0	0.0928147025677	0.680227515966	0.0285421732998	0.0	0.115380586957	0.0411985277007	0.0184442112125	1.11496390975	0.973030273463	0.0561958083946	0.0	0.0738628729961	0.00740498858459
PPP2R5D	12.3427406447	12.1691489988	17.6217978206	11.2233701636	12.2051949069	11.6128972996	5.71994864409	10.295273591	13.5944039483	18.649843331	18.5337533199	10.4778204535	10.4484633715	14.4082925826	8.62209956177	13.2930874763	12.4150477564	17.9198016018	22.1963081375	11.590310697	8.73964815655	9.11848844852	13.9982195272	15.2076215186	9.40049002591	7.76249178145	20.1686335512	13.6030884776	16.5546659667	13.0430619591	8.64746361789	24.9537994868	19.2275835369	14.4399777694	23.3987307241	16.566226164	14.7362001413	21.4279143842	16.2834427477	17.5168709368	9.42119382446	13.5503001867	12.0483898966	24.7245471819	15.535860498	21.2816300571	22.1381097505	16.1542003666	29.5610261363
AKR1A1	11.0835318082	43.0267471913	67.5384275559	17.7676289582	10.0304584694	9.19121776908	48.3252510287	9.04966786331	47.4403485034	23.2520336414	48.6044706316	48.3279943567	8.65977905912	8.26170519939	16.0621934702	27.2656646249	40.0917825305	46.1120373086	56.3404875671	44.7783806692	25.1338525661	50.4824228203	64.0364413458	67.8700877567	19.6196688122	44.2621762384	13.30479683	53.764864527	52.4683666045	23.847263411	31.259773326	74.2956543519	31.989817361	32.8197999569	24.531748024	34.9812517311	73.494164291	15.0530073531	21.9324320179	32.8929242473	16.6412293975	23.7087175584	25.9294122702	27.3930243782	30.2537552526	31.4062049144	53.0618011844	59.182696804	30.6116533767
GCLC	2.96775805057	6.26271150367	2.87824934847	3.79323868091	3.54090080472	5.79767027995	4.58488989767	4.07252737096	4.37916091737	4.39862412979	5.03577179205	5.84380397365	3.89943492776	2.89081637399	3.83923110049	5.38728216329	4.65665914361	7.95599066749	5.87524766145	4.92036649847	3.87660430004	5.40493447607	3.66706447482	4.45177523258	8.19343576122	4.77438243906	3.96711114777	7.11209118628	8.18810375353	11.8978340531	7.0557774511	5.54157836238	2.78835837881	8.52100496466	20.7109501392	3.2109693285	4.93672423751	5.01139682561	5.30545526924	8.23289035903	4.39192399609	3.65497097859	5.67680478914	5.88878113001	5.27655077557	9.26772746058	3.14472654223	9.65104360305	11.274612673
PAXIP1	1.3030618062	1.63983433529	1.13591448539	1.13309776231	1.54839527364	1.54040400985	0.85810087271	1.41946786538	1.47049232549	1.84340364826	1.81549472472	1.69483104245	1.45440753778	1.11510120414	1.29107309705	1.34905468969	1.56912156782	1.897896348	1.60715908991	1.71939671817	1.56598409356	1.60502901794	0.889226739027	1.55379097242	1.68993669951	1.23376584329	1.21662089032	1.74565885898	2.05379890632	1.96707333074	1.45633226292	1.24147888829	3.13547641052	1.55269827142	2.43038644366	3.21307079087	2.71615862581	6.1780371636	4.32205486145	2.23661787293	1.48012438734	3.21123468627	1.83917265961	3.00661526658	2.95000969577	4.2863624129	1.98598929137	3.7885732868	7.74046920036
LDHAL6A	0.142242966056	0.0433675121774	0.0479970526964	0.110792853553	0.349522922495	0.164369595304	0.0	0.0951189387971	0.0844676082116	0.0761418156568	0.0723494739222	0.0	0.195624482108	0.0752116308851	0.0471331511386	0.0421405129438	0.147383793752	0.059085359856	0.0759978799783	0.156166474605	0.035737069803	0.186754366707	0.0277477807584	0.0560345258393	0.0794881914098	0.0173608312202	0.0654145008553	0.0	0.0214673077703	0.0771604879084	0.0551885544244	0.117981813628	0.137912984038	0.0359620830542	0.0497531559931	0.060369331223	0.200408786554	0.298293508407	0.0882675617885	0.073688339634	0.281074077902	0.153014188906	0.117433850585	0.031155259795	0.435179268702	0.188917008583	0.0305385776492	0.094056628297	0.0801505541287
ANG	6.28672530197	28.5154918378	16.426420691	9.14355882279	6.60031453365	4.14535708001	71.7661869598	4.80622577011	20.2649015068	11.6810597042	11.2519116101	27.5617488145	4.6742230258	5.64450140906	11.3728103038	1.61938918709	19.2432938632	44.7105666708	22.028695382	20.4747353086	8.99602510592	34.1263101321	18.9299726244	22.61738416	1.34961314082	34.9114418205	4.75267697086	33.7356836827	26.8934550392	1.674436546	1.69664281791	19.6593532145	8.6458903448	11.4551916461	8.0768240372	2.78750954209	7.73157478085	8.99398251811	0.253517799226	9.84893144543	2.65698092903	10.2540662575	8.30777317444	7.87967875038	4.41580157246	5.01066035071	6.76514917525	5.05170915458	0.596826544977
AGL	5.67505112237	2.66209473269	1.98307101877	4.50577269322	5.17092102121	7.18653380062	1.7159621831	4.74016963369	2.77120656004	3.77561630454	4.00729297532	2.51069182255	5.76589192347	3.62882806213	3.82559313237	4.39958646952	2.78597834338	4.14465748255	3.02595346252	2.91023156695	2.93881763876	1.83510728243	1.64202773073	2.39847968003	5.57585378347	1.98552002095	9.43865302692	2.96950407181	4.96299516861	11.5631633117	4.64331395754	3.0628269066	3.97726503565	2.90628428818	5.82745490326	4.99035195759	8.55237852396	4.06124617487	11.5341480744	11.0608045281	4.73216601132	2.44234469243	2.92953819827	5.75891557508	5.84695819972	4.81304026078	1.89379192248	2.60707041097	14.362181249
ALDH3A1	0.89378247915	118.840651106	3.3738693941	13.1295624065	0.0931656252652	0.140742443924	48.2469702069	0.107097704353	60.7641713121	37.3429482798	5.26645923366	116.676223386	0.675809890195	0.219843054092	22.0165125463	287.937783963	37.4616876841	60.195806711	90.4616515162	76.6131014695	78.1408708231	118.262621494	43.3043637014	83.2299261638	185.576178916	143.989777034	6.82428044293	106.383644471	189.706278236	180.375254394	195.557354954	17.5396532281	15.1407899766	2.14981033535	13.2112241158	5.12414513624	0.220459895367	1.24187644883	0.078821398073	11.6904606803	1.26489204624	0.496313622928	0.840207729385	0.41714377816	0.722068443311	281.472955797	10.6375382952	43.0836972687	5.83787149303
CHST6	0.540315675896	0.0821017825296	0.384716014838	0.459786952774	0.636253817197	0.725721403015	0.0311411497589	0.534759859163	0.0580322090423	0.238956495115	0.954682813247	0.0503419296226	0.513455842548	0.577425582958	0.0637362514411	0.87821097671	0.238518455591	0.104240649041	0.285100695235	0.0556328083461	2.60585142608	0.0244393903296	0.264773589862	0.29087139272	2.57414156099	0.00530111105624	0.381860607501	0.106654266866	0.0114712836598	1.05287645042	1.18636428889	0.722227892132	0.360287967983	0.285505563376	0.85776778174	0.340409179205	0.431500430099	0.173409162514	0.466118056488	0.0388647675434	0.171651332024	1.76077897348	0.407350281177	0.459352860322	0.214086892569	0.113623160305	0.172511051283	0.0660562066106	0.0244738851077
NDC1	2.45274629445	3.43324758644	3.90368862533	1.66372284193	2.48121482084	2.19247126497	4.30783302322	1.84282415404	6.32754502078	3.07613923787	5.97540434047	3.50560218003	1.72509594784	1.22828994256	2.6652567665	3.39553235358	5.0694227285	6.03376396349	4.08971559835	5.10324262564	3.98459907299	3.13947884643	2.82621278882	5.26569152111	4.95043477882	4.35399504354	2.11997385575	4.38954578529	7.35417915918	5.82144889349	4.05779354513	2.60298504603	12.0540155716	8.76035742914	13.1176880754	11.9521024204	19.8592123159	11.5208276789	18.484098031	18.0926405643	4.46524874237	8.2496481449	9.73207960539	19.0206098352	24.8713285584	17.5373112275	8.69315552248	14.641193621	26.4716855875
TSTA3	5.45565473913	60.2789836611	41.7989595247	10.5206715807	6.18593441677	4.75763472611	58.5884288885	5.08541679773	60.7244794891	21.4039156542	25.4328889486	61.0784371808	4.21387503916	8.7835995386	16.9123651051	17.9506979629	50.2356725103	83.0063826329	45.8653890029	56.6287001263	24.0914539543	55.6840915108	42.2421925677	77.3334935464	12.6462815669	57.5257325658	9.70344346665	58.558998772	87.0497966893	17.6357783218	16.6044167239	28.6400689714	67.0934736718	31.5739656806	18.7448285518	39.4784691508	140.781848012	47.9843809268	45.7342801946	34.8430140869	13.5731647181	33.1831685422	34.8121399495	45.1106829682	9.09675258192	31.9709106234	68.0654939679	51.6948628684	18.0259083069
ALDH9A1	14.5090095761	18.8631687556	22.8692172181	17.2002251425	18.3331169336	13.9225516503	18.4665900171	14.9810298896	18.9896486653	17.9297096388	15.5253266354	12.3155108726	14.749390905	20.7088027984	12.0170361354	69.0073001567	19.3217213061	26.302332578	26.4038020525	19.8518526677	29.8592163275	20.4391024554	16.6157536148	19.4667195072	58.970097755	13.0152388284	20.3255379645	17.9221199285	24.0190652542	58.7172973372	75.4746591555	29.7863013017	19.1845938204	16.2131936061	23.6416251597	19.2831396601	23.427863576	18.2738935734	23.4202238479	23.2567957456	11.2160746126	16.0458333162	20.8135496783	26.7421756376	17.1941526009	15.1801472206	13.3272503855	16.8305465217	29.9684712006
GAPDH	415.574408043	585.827656746	1035.48497731	548.363503355	584.744548253	404.842872076	396.652198434	496.580852066	776.374684387	499.471247584	743.496430333	517.116506096	462.578126492	839.618285062	254.292487001	1114.41569311	791.969599256	639.535032774	892.096162808	579.721211476	1064.41230803	537.003567333	784.986602569	893.143476639	778.178585713	588.335274739	989.869327625	579.343687825	636.567956507	582.425038334	748.460702806	969.264954508	1251.38761121	958.961384103	573.620585453	1508.3165173	1701.14705192	900.815733191	1455.41876403	771.518628344	457.680204407	890.021980684	533.020831393	742.34302364	877.608094584	1316.0065977	1627.49192181	1270.98308486	1617.11143402
GUSB	7.46000789468	18.0639810906	16.338992681	6.71059991318	6.77951958812	5.81311773805	13.361794052	5.65069905343	15.6036767202	14.2355504039	15.3290758563	18.2628086517	5.37096929058	6.83148718278	9.74427636125	6.73247739386	12.5787748352	25.7124527275	20.8247517422	14.5282678009	8.46375562471	20.6873500711	15.8673341832	21.1477500886	6.4965866099	14.1815463738	7.3184506673	23.3671357305	21.1308163251	6.71038205596	4.69766855432	17.2436348418	14.3886104086	15.9411739574	17.1462935531	32.8967971354	24.6399158397	35.9079346391	10.4604552485	20.8862241941	11.2309359209	21.4867995426	31.5825209268	34.773999412	185.338330141	19.0096320169	24.0063743601	14.6352584856	17.7326085592
ADH5	31.3110268175	15.7136806226	17.4855156815	32.6195472432	32.8208422585	29.3199216103	23.0212053548	33.4434587441	23.0957458534	23.8338904819	13.8555869605	9.81313806435	28.6606622956	31.8651886828	15.9094186496	13.8850651897	16.0137580378	18.7077087964	17.7190188369	17.069002093	13.9782618183	11.7586716307	10.3408810995	12.3226071609	18.0801821122	9.06021322723	38.9132489555	14.4703723531	14.5174984936	27.5075890649	15.6854445975	23.2439967489	13.5876788296	15.177487703	15.840162809	24.4898998043	42.1571721772	15.236777521	8.78856686964	20.1466200347	24.436352222	16.5261954544	17.3423124916	22.1488487797	28.7838309181	14.2383409809	10.2935623042	20.1192462829	23.6078873251
GPC4	27.5998890831	9.79941748088	4.75461126449	33.36668931	18.2476415451	23.6108289593	2.35951892753	31.2285335411	8.83348111976	26.3551488205	5.2620676752	3.73434607016	29.2524390728	20.7941789736	16.43991008	2.32341633155	7.05790382368	9.28953687175	5.96610499929	4.72692199797	3.19729764653	4.91014451852	3.11399749277	4.9197681039	2.7329247487	3.74729341686	27.7275451732	8.80739832478	6.83297914199	5.83826820136	1.58830879357	4.1037486466	8.71234691121	7.01502369273	9.15477206102	1.66816528201	6.83186342625	2.64984837659	1.21547321796	2.14796918018	16.9524606312	7.59934392186	5.12099285121	1.62202430239	5.17434877048	17.3412379165	12.586283912	20.3166071802	26.3167158308
ALDOA	111.300239876	190.573882573	248.155024122	156.678385897	143.89834992	131.236581919	80.9944922011	138.512740467	183.148912934	155.007968896	158.578093578	180.548520182	133.194266032	234.646688766	87.3701218162	330.060934436	159.007352101	197.454719842	160.442201497	129.284555158	233.390735471	165.030087277	179.307769201	201.0917012	171.811157083	192.568134383	263.891657132	196.857620079	199.889942246	133.967155507	187.423258429	170.919635157	305.120795785	264.186199021	91.8304130678	376.643407836	319.266532867	106.174326014	179.308887467	126.495315839	109.485585447	106.053269983	244.001381995	134.874012315	86.8208338303	209.525600881	367.050713795	171.830664711	143.137326956
NUP85	3.62386101886	4.32785223431	2.83232521189	2.24200606974	4.26768839675	3.01084282727	2.65994397439	3.27111919786	5.10715102309	4.03394246611	4.97964644788	4.54287201539	2.72559483761	2.60838554004	2.43095343766	3.5963130039	4.4440002712	5.53483312611	3.73586937575	5.12401259118	3.76569205223	3.33912759297	3.40608417036	4.95574396428	4.60266680606	3.06044074244	3.33414556505	3.92148935719	4.83733722261	4.50043783367	3.99048638029	2.80612429692	8.126853889	8.10991420556	10.1124113137	9.64608679352	11.4078135261	5.53039319449	8.77296236863	5.88457177778	5.90413511844	7.84400966752	8.65262380306	11.2458943161	5.44182192017	10.7788888985	9.98755272727	8.08426229115	10.4126538185
PGK1	26.267126714	45.5428073672	51.3156965575	29.71164681	26.7038268454	23.3029200751	56.6310564118	25.4942376843	59.9329969818	36.2493349956	50.38825636	34.2056445208	24.1170178264	39.2535067309	20.5603795444	70.9497053553	47.136799332	54.979143756	58.5106685499	48.3977737292	46.5954448506	33.9589548543	46.2503314819	50.9135351795	59.9713669635	33.8433678898	61.2716876369	41.3906570055	50.1706146479	44.3845508172	59.1164507306	55.6809605706	80.0333623665	89.6538971419	56.3373400232	91.6797761635	165.7657129	74.9854581744	71.1919006397	85.1840694814	38.0726198979	81.3624702134	49.9286677707	26.077896846	74.3841114831	128.907470853	89.8670652294	89.3417076092	66.556748496
G6PC2	0.0235417798542	0.0215324902062	0.0	0.00833484565201	0.06674704819	0.0220571558118	0.0	0.0	0.087373293934	0.322045362605	0.02993531833	0.0	0.0103329683894	0.0	0.105866982768	0.0	0.0365889111016	0.0	0.0269527567027	0.0215384801775	0.0118292560013	0.0515143245123	0.0229618435332	0.00927393816451	0.00365433711975	0.0430993051539	0.0	0.0394147630294	0.00888231326303	0.00399074043462	0.0	0.0278949458324	0.0317015979309	0.0212566735493	0.0126682251223	0.00666091052982	0.0297665629063	0.00474699700149	0.00429665721948	0.0	0.0740073157553	0.00361778004582	0.0310972352116	0.0	0.00500166039495	0.0189494064172	0.0	0.0233501223145	0.0
PFKM	12.8754208531	4.60048570613	2.01925656581	11.2227626814	11.8672300679	11.7767239874	1.68816807722	11.9584020245	4.75311198811	11.3265027575	2.61812211065	2.45833658469	11.1063332897	19.1224376706	6.9228604443	3.82999640541	2.8778688887	4.54962678667	3.13366499624	3.47750550871	2.89022227346	2.2195522802	1.98993186853	2.68564158646	5.1925300919	1.91685599471	16.230679043	5.68169977772	4.04316583096	6.50091014135	3.16235872063	2.51917134204	2.69565859671	3.14990692096	5.95806810745	5.35957994349	9.97925364162	6.00787734863	3.77152005726	5.86248295284	6.83095884862	4.56940917375	5.02137471804	7.58776856881	7.59192857519	9.49145043594	4.64035448253	8.26796501046	3.78624568913
ADPGK	2.31706524867	5.22640600676	2.76764795593	1.76541052948	2.95415615409	2.29723300532	5.46945386426	1.97851581339	7.51006190133	4.5500950557	4.12794030011	5.62294993518	2.02893319342	1.78489444602	3.22352744831	2.87321243166	4.28302373989	7.34504775938	4.91361797079	9.66511002459	2.78603810097	5.23075063883	2.85220378781	5.1551196908	3.8354828141	2.51309667269	2.36561910885	4.90801631749	6.90771706723	3.64396453655	2.6854298355	2.67742017532	10.0253430483	7.48158928243	11.0134101815	9.82157209877	12.4551631859	9.4768860851	13.642122115	10.330985266	4.39517036176	9.0810487999	10.2426125241	11.529049025	12.636444947	7.05141327463	8.73147674101	9.09192188839	8.55784892125
HS6ST2	2.09939578833	0.330914802499	0.0438986786535	2.2372103641	0.586661542949	4.3393820959	0.0799518181007	2.973978726	0.651150002793	1.48786873315	0.0270088548855	0.0287217597665	1.70327957611	0.491353267656	0.77067519393	1.67108042262	0.134798981128	0.171556117609	0.119157549085	0.0544120861397	2.09934628662	0.0604217990909	0.0290039454492	0.0644283800334	2.37258649903	0.00907338511223	0.339868288634	0.879556740332	0.0336587254814	4.05788456178	2.27286722256	0.00587252126963	0.0400434492862	0.507466564876	0.040004247683	0.0126204600277	0.445819508824	0.0989357449026	0.0108545301624	0.0350110322433	0.881395592709	0.0479823798519	1.24714179715	4.53360841512	2.02800751159	0.0897588344592	0.0359112194931	0.0589887891939	0.0295690712317
NT5E	13.882664962	4.91839824275	12.7803191173	13.6092832608	10.1807470301	15.7939226941	8.28351749763	11.0027731737	8.0151617165	12.3580031303	44.0100406573	2.80071267321	11.3808730169	8.22894314714	7.39822474409	0.844420857567	7.02488124711	5.83509095854	19.0950044384	8.67145959056	4.15495114486	2.196757756	9.82624943005	12.7867005357	1.16893642701	2.51563155128	10.1877781789	3.81315152662	5.1589378751	1.92857175482	0.717838367462	23.8810346116	5.10526505396	13.8071074744	35.6844031613	36.6805601369	10.8613339053	22.2433671266	44.2651427641	9.08019810267	12.2739119209	13.9916625697	10.4805460402	2.86408061719	5.22730335784	1.03201736361	5.22652295175	0.348775174287	0.333520163106
ADH4	1.7334830763	0.393182276324	46.070772286	10.9048696553	7.91510106972	0.360613066803	11.2353218584	0.460090906858	0.118729846357	3.33567164913	100.603049524	0.366923505798	0.364195362957	0.152915569613	0.00709838267105	0.0222126715191	23.6247449254	0.436022496581	51.2185700522	1.46341080157	0.188373547718	0.30938295471	55.3745029153	21.9395933188	0.0744870998726	0.0549063712213	1.23724561185	0.100424895611	0.0226312506702	0.0813440773466	0.0232723361992	156.409186358	0.145390532704	0.211223570226	0.649582222243	0.0296998405707	0.585068719403	0.272134713956	0.0	0.105932279376	0.363657752423	0.0230443592401	0.297122482785	0.0328444768976	2.34484690346	0.271581764923	0.0643887173264	5.90971637597	0.00497036840788
GALK2	1.43209107631	2.45115182796	2.94602544367	1.4456768202	1.58333316245	1.28747285561	1.54962781581	1.20080908582	1.76444320619	2.05388444576	3.54728439959	1.42159298966	1.18197075118	1.14926687656	1.2785845145	1.06175375314	2.94036833173	2.78857897147	2.85194237119	1.89771332286	0.876179373689	1.82306299046	2.17954193842	2.50904913161	0.971994959898	2.02686724764	1.32658382067	2.40421680609	2.64451092411	1.29330777762	1.05365803437	2.40568134026	1.7811364526	1.2966119256	2.90695479212	2.03703486443	2.86029639817	2.80692750262	1.81499678389	3.8598809971	1.08360484945	3.79504214075	3.51791086408	0.83598124895	1.94261806602	2.55746847912	1.91638191729	2.52887312611	1.85855479124
STMN1	3.29945884396	7.3547560283	9.23815624904	4.26826367541	2.88729045703	5.65689481244	14.1692473877	5.2321394952	21.9590350677	4.57060068071	9.71402001905	9.98733710635	3.6394103179	3.55027316437	3.48747247977	9.12044274583	8.14803570874	9.31969552965	6.82500394331	13.0007197473	7.74045410965	10.2700711987	7.05409214517	11.437820039	9.37332218215	6.91962636984	3.12300357912	6.95759855558	10.305331207	7.27428928448	10.695272119	4.9403333198	15.20269091	18.1573785698	22.0008232076	15.8583608984	32.8576106304	36.8714898464	18.0614354249	16.6483391347	6.73338744551	16.2586305765	14.0952806693	59.6255030426	29.1733565801	18.8735527999	19.046297767	39.303024586	87.024805485
GYS2	0.0798631580303	0.0	0.0	0.0166324346504	0.144295382754	0.12471119652	0.0	0.157073803148	0.069742412144	0.0314340254292	0.0256014969298	0.0	0.0893522436822	0.0354857284198	0.0222379727868	8.1287899081	0.00608452251983	0.00542055983354	0.00896417248786	0.0787979199769	6.85153566888	0.00734274147514	0.0286381549494	0.00925321097193	18.9491439289	0.0	1.22000918972	0.0131088904286	0.00886246134961	7.24293268137	18.746494686	0.00463876680111	0.0	0.0254509980235	0.01263991172	0.00332301171866	0.0509143454199	0.018945549974	0.00428705421803	0.0165933512969	0.126586131218	0.00721938866105	0.259857264625	0.00367485412469	0.818439001409	0.0850817457671	0.0063037006546	0.155319566268	0.0233569228056
LDHB	70.7713412144	39.8967039035	14.8336958948	85.3383904416	79.9236046777	80.8634520233	37.6637121198	101.52741294	89.9215596304	46.2498099873	14.7931165183	54.2480448297	86.5807550088	94.9898585138	67.5245942279	20.476263127	33.9801266464	34.7910101394	32.8664607798	97.2273205299	23.8676951251	58.993165313	20.8014731346	37.0642747419	27.6862282623	63.5123574385	66.6993783348	28.1329532742	78.0375462836	30.6989681229	22.7065953022	14.3484101615	11.6968056395	21.3778144981	117.026073928	37.2834027833	54.8073044029	4.32648276828	230.798586709	74.6598678314	48.7887053275	36.0087665682	61.3720499333	93.273252681	115.730465495	4.56583501924	10.9868240521	15.516846423	76.0435791058
MXI1	16.8246820425	8.6223048611	7.61776361118	22.382823649	18.8874563187	22.1134118528	6.5189395471	21.1275827313	10.0674314876	17.9103939932	9.75248653307	6.15925368117	19.66028349	26.5881499495	12.4573580536	22.0132842248	7.64006299344	8.98424083045	8.14788992102	7.499742121	13.8854782873	5.6707448919	4.64535613861	4.58588894748	16.4889370256	7.0651084031	27.6144343189	8.62670271066	7.64875236557	20.0343702224	23.3143622901	13.5320812268	5.60386125787	7.39969398842	4.37386489801	6.68015805997	16.4586506503	13.00864709	15.1524316828	6.53530959722	11.8185889838	4.15461635662	3.43827961492	4.30955814619	4.62086326373	4.74943406174	4.28547654661	3.17303006092	6.0868941872
PDHA2	0.0101055030281	0.0	0.0	0.0	0.0	0.0157803598699	0.0	0.0	0.0	0.0	0.018357117304	0.0	0.00739251973829	0.0	0.0	0.0	0.0	0.0	0.0	0.0	0.0	0.0157949631182	0.0	0.0	0.0	0.0	0.0	0.0	0.0	0.0	0.0	0.0	0.0	0.0	0.0	0.0	0.0	0.0	0.00922187761736	0.0118979799134	0.136149643879	0.0	0.00834296531905	0.0	0.0429400789402	0.0	0.0	0.0	0.00837384183003
TGFBI	23.8206037513	13.4692940497	10.0043249837	39.4364395947	42.9587976207	22.3216322186	6.85928930259	29.7166552286	13.5064084066	21.5139138856	6.8274373592	9.51074430923	30.053756091	68.3070738504	10.1731720965	1.93427787161	11.0607083616	13.4339379262	22.8129260077	10.8990868803	7.23235562182	10.2561043692	5.19333468996	12.5015595696	2.9448763441	8.03628209096	23.2127788035	21.0174219206	10.7528164122	3.88024137969	1.99914284642	4.57809577022	24.5195217672	42.5558740543	20.4036384337	16.2778133246	18.279117049	7.70779202626	12.3026884854	42.7363738556	144.982321518	125.526487145	23.0457613502	7.19315852261	30.2196990892	6.41642732898	29.1041423372	19.9878741217	9.33391083731
PYGL	3.55113863474	2.15975633842	0.879552492972	3.55301458892	3.63725968626	2.51885854284	0.707707454219	1.96321263516	3.20957545975	4.73310729539	1.24225421076	1.56984351151	3.1115020052	3.16768923883	2.15204528687	15.3707960109	1.89852320266	2.15487927882	1.61503075282	3.04881571222	16.8845186321	1.73032207886	2.01523318056	1.39529472958	21.0021563312	1.33805766227	5.0603809685	2.04515083629	3.94837614763	21.381194518	28.6327560309	0.648004204024	3.27059003247	3.67993423653	3.96459603693	1.78305689073	1.78640589406	0.680191837958	36.3661034332	3.1195223767	2.13465691473	3.75595390856	6.29647313751	4.76170104008	5.98755458389	0.836170204231	2.83103689657	1.39408860386	1.32138456156
ALDH2	21.8251917398	38.7511904185	22.1456549403	34.9924710477	23.7465184787	15.6093994774	19.9089623482	24.4786689379	24.5980841869	26.4618999476	24.8416065727	27.1461604595	17.3677850887	25.4627351419	16.1153647014	15.2013348782	21.883864118	42.5250748638	31.4870542713	22.1635466676	10.0725901876	38.2273727378	25.5962101307	32.5231859242	12.3749784215	27.3065727956	14.5073424941	36.7232456466	48.7536307816	19.1133166971	11.3616131921	40.2122839362	18.7270177592	26.0104486653	11.0791986204	19.2766802129	8.13997811691	5.9535864528	7.07268678104	11.2281677109	16.5364854842	10.4471773314	16.6538771714	10.094620122	6.40323163988	6.84314581989	17.3849760353	17.4139983268	0.76013807664
PGM2	7.24558019271	5.46208664227	3.02426137666	7.80899542433	9.88298710629	9.02237815206	4.75277295365	10.0823930085	7.41084679021	7.47186105532	5.62845868786	3.47870344783	10.8506861855	9.17425834404	4.54582227679	23.2756848814	5.9423641562	7.29230958349	4.58581314264	6.24498657505	20.2496966343	3.47693874948	3.23520844868	4.29551840267	21.7358570922	2.78776328108	7.73704532032	5.09887705677	5.95386565831	27.5649567514	26.6863420535	4.90693861878	12.9451044467	8.41457818348	10.9872227876	14.4229438401	19.1365086179	11.2659477635	11.6870468375	15.7192615745	6.25278756852	7.4536133841	5.67357680423	5.80764659518	10.0009576944	10.9992504852	7.46765923887	14.2956984225	20.80000818
VLDLR	2.66259824082	1.28492101451	0.26913348967	2.91310173852	2.54616510522	2.07275423977	1.21785479001	3.74629969271	1.26302545038	3.03842723667	0.271887403951	1.53188459621	2.36038825328	2.20164265564	2.766881006	4.57564681208	0.69378802237	1.18344072197	0.508063841011	0.948943907954	2.79257017245	1.09582101976	0.520553893409	0.642368428115	6.92965268552	0.918188876887	6.23849964969	1.88601265968	1.0343201278	5.13050940606	5.35783179897	0.188238861993	0.500694474228	1.24190732469	1.30667777397	0.16827910677	0.214860827427	0.222380467732	0.805134397054	0.489709081384	1.83255078364	0.757820132203	0.476060910875	0.335220358523	0.415064440099	0.134742372834	0.36573208565	1.6225780555	0.0548321207399
B4GALT7	2.76234858498	4.96211655267	4.95650181149	2.31811308758	3.05870346543	2.87027674932	4.62351503298	2.50209403791	5.7042979938	4.31389412834	3.50984208	5.45154973095	2.04915185653	3.55564189869	3.40330350771	2.31686008484	4.5717573365	5.01011552702	4.50739770479	6.16111132539	4.04027194333	6.52536186069	4.57302800223	6.90557350133	1.93304569075	5.41256242419	3.25967723263	5.48316125291	4.41400220823	2.44004578025	2.47373314161	2.5801786926	6.47849531494	6.99999042697	6.05835304331	7.41866176829	5.45085241251	3.90504814728	8.15651959731	3.65666675545	3.52719781011	6.50293576838	5.89000143665	4.88698465679	3.53083013217	2.31062473597	12.033448533	5.06503820248	3.19469798915
PC	1.50437812043	2.77390812545	8.14625057334	2.77734438379	0.938460269248	1.00402173585	0.500592537492	0.854436343207	1.61235937642	2.66508773182	9.68195311628	2.50166349883	1.0659996001	0.632869735551	3.322650291	6.45817402961	4.24090090397	2.69538366596	5.56115663647	1.97218030702	6.13092555747	2.10690470744	7.75729777075	6.91398924657	4.94787504403	2.31785110812	1.74771025	2.92324496626	4.9477834288	5.43491782448	3.79970264127	12.4425954183	1.75503405114	5.29220160387	6.72772363465	1.47326428171	0.894578879312	4.43504233098	2.39226739063	2.08395918535	0.53513448689	2.47017101788	9.77814115981	4.79260995724	2.45251822555	1.4711806642	0.976000472737	3.14759149781	1.80405924057
GMPPA	2.69376959502	15.6767918989	16.6180679033	4.17738993181	2.72256735557	2.27779474741	8.80598812997	2.21748131761	11.5956866363	7.20240731219	12.1356282019	14.6087350392	2.10182190907	3.58848180554	4.66092642123	5.16922637343	15.4391283538	15.6523927132	16.2577299329	12.5415554713	5.44684427702	15.5689093748	15.8694508099	17.9942408346	3.09112295055	13.5081139926	4.28565130248	14.3095083999	14.8392613954	3.18151319586	3.81222781617	13.6456177882	11.398987157	11.775204291	14.1595961428	10.942600919	12.3513846907	13.3706859596	10.2182624856	6.56413181073	3.9602154152	13.6616834642	12.5073804807	14.1652163761	11.6867252475	10.0249948952	13.5176599406	10.8634717593	5.59186025278
ALDH3B1	1.88527874059	7.55215968189	9.07112785673	3.58894604601	1.51102584191	1.10615892946	4.96044359561	1.358268249	3.91472179847	6.01267533555	11.9662694884	5.79099338631	1.2589374091	2.41748265406	2.73562305048	9.25534070064	7.96378965128	9.6005951803	13.0548601785	3.71110245538	3.92482342144	6.25783757005	10.5261997785	9.69680091247	3.22463814474	5.21043453557	1.81713657469	12.3245490721	6.9120778392	4.6470052318	6.48755533422	21.2710714672	21.8438889305	3.67524549274	5.11880370581	6.13370991618	3.0885167519	2.2723937691	1.50765590632	13.9246515731	1.79006850423	6.10493557763	17.4565557136	9.18374330934	6.07421309849	5.27285965617	13.3786485242	7.32334333457	0.686346666433
CD44	33.6421912441	23.2258784313	11.7153494159	46.7913071725	32.8628995529	26.9936698831	9.31606290581	42.1992774931	26.1901238612	27.3046378087	12.6902677085	22.7179057475	30.5631419964	22.946308016	19.0657857816	41.0757055241	18.8729219787	20.4749307678	20.4740808286	28.1268807462	48.8076637584	23.0340536981	7.58083882931	17.9586303822	51.0796898288	13.227026902	31.4381565404	21.7716237484	16.3363864112	64.1868556655	35.4715041576	5.11975945601	39.3157184243	48.161467402	87.5668073101	81.7463341098	26.9802948188	4.54456403549	4.05468454048	67.2905355696	68.5582657645	58.4265002305	212.12641613	8.48717444239	12.9912247817	38.4744950289	17.3010577148	6.55418608435	18.8503814052
CLDN9	0.122015322415	0.0875304479929	0.605465259868	0.0254111147927	0.161101869361	0.0224158087518	0.0321627313791	0.0423490804699	0.0266381993701	0.053361174875	0.371583872999	0.092432694195	0.0210019682711	0.0271076344904	0.084938208254	0.0531587153525	0.306766785151	0.140786481842	0.150650571001	0.0547217484185	0.0	0.11218276244	0.577546369357	0.452387227537	0.111412717065	0.0438001068637	0.0728099996607	0.0600834802278	0.0203101675222	0.0365006747069	0.0417710053877	0.382705049531	0.048325606602	0.343476737229	0.019311318784	0.725998632442	0.0648226544126	7.71387012741	0.0392986940806	0.338018707394	0.257865211691	0.110298172129	1.02511846258	4.62070062759	1.61639024959	0.079437298243	0.154093193758	0.0593244977503	0.321163385387
NUP205	5.39569931361	5.15184870348	3.23374394109	4.13822789316	6.61380036418	5.67393723201	2.41874799999	4.91108151321	5.13423701339	5.89522269688	5.16913678671	4.37096000916	5.65794100269	4.8229548207	4.16396773395	6.21648755127	4.33459819059	6.6112787523	4.77572142652	5.35057893678	6.6155296618	3.74286103323	2.64410420165	4.59877905602	9.54623027779	3.62979229213	6.44529521868	5.0331119391	6.59593949449	12.2910117484	6.22645108529	2.56095727328	11.0808922417	6.73948707737	10.7297073425	13.1041874575	16.0060227598	14.8596769242	15.8837164979	16.9960433372	6.26608826069	13.4660691675	6.43001611968	11.8480287411	9.32600577317	19.1256036887	7.82316471574	11.0904653006	26.4329489134
PRXL2C	6.12590088618	3.11280865228	2.82732054918	8.36541891447	5.72074398718	5.9861802498	3.97654003723	7.10795809929	4.85171095532	5.80648828483	2.17533030527	1.45924669216	6.47066965046	4.86513478938	3.87881730203	1.40459494724	3.44800657876	3.09927363276	2.88587058026	5.230682301	3.78774004583	2.81129857171	2.99564015372	2.51845759169	1.99217064934	2.19817170552	4.78820970531	2.54276769165	3.06013548702	1.89653986689	1.46234637323	1.42742254837	5.70505410236	4.55340141488	3.81569179393	5.38944659742	6.87700261697	2.39062247663	2.54696059642	5.99917443231	5.57077487967	4.93793543463	3.02896171238	3.25807991001	5.97535425345	3.69625560891	4.98701211437	12.3665801277	5.25408071119
PGK2	0.0117333432288	0.0178865050225	0.0247448920002	0.0	0.0277225578939	0.018322331715	0.0	0.0	0.0	0.00872331806169	0.0532854122701	0.0	0.0	0.0110786783703	0.0	0.0	0.0	0.0135384317373	0.0	0.0357829614858	0.0	0.0	0.0143053750082	0.046221781123	0.0	0.0	0.0158703348543	0.0327408650896	0.0	0.0298350810005	0.0227619779492	0.0115858194745	0.0316004764064	0.010594434584	0.0236771552076	0.0165991590157	0.127164058896	0.0354889129896	0.0535368971726	0.0414436812296	0.184428119406	0.00901560019394	0.0387475518486	0.0367133751788	0.0997141227063	0.0236112021746	0.0	0.0	0.0
PGM1	11.9255807177	20.022188708	27.6918936856	15.4749961296	12.180180325	14.1986199354	12.6466769369	11.3136241505	15.3188099899	15.6088612217	29.0053943433	10.5978377834	13.6688665991	18.1487766943	10.7879831398	15.1040124374	21.9594969975	18.0937863141	27.6570539821	13.0117346631	16.3547056345	13.371142998	23.3820270239	20.13085141	15.9849327709	9.54981547573	20.1982178521	15.2081718596	15.4395344387	17.5265709186	15.9536644294	40.3426675605	9.77110681948	18.6613064701	15.1601525044	20.8458813647	21.8434118952	9.46642892258	1.50028449672	19.7800861567	17.2061192978	12.6931891583	14.654049371	12.3116598151	19.9218029026	10.9529538162	6.7725418586	9.98493667636	18.416653806
ANGPTL4	9.01668189923	3.05448466027	11.0893206616	14.5605841335	9.54541728392	8.38233388211	1.06258822445	3.06641240066	2.53753354999	8.18885491463	4.11903536219	2.32850693172	11.91271495	4.32676400033	4.58108511198	37.0623816373	4.56839286728	3.74154906892	6.86623829847	2.49488841702	26.883318748	1.52884042688	11.5786391205	4.13347868432	19.9915576971	1.70029826604	9.43352014137	4.46631833281	0.87789785348	5.16529155771	8.80916059097	12.6847358521	6.2426091816	26.4049079922	0.58217946334	15.0160660551	1.27425354907	1.5360322187	0.925070991805	1.29123282413	1.53081495911	9.25124807749	3.84193216804	2.34644617969	0.478603684045	0.608392757403	25.5420566219	0.450789696845	1.0561432097
HK3	0.563500049701	0.954454353114	0.245222631846	0.261255610293	0.470213342904	0.338706958229	0.150304557736	0.167122257781	1.33892712336	0.498740464257	0.365580038225	0.705536788137	0.199566575403	0.257584323178	0.391645173013	0.00414040146172	0.312785144296	0.712113279335	0.332813295151	1.11156670116	0.162921933909	0.496297904958	0.430752668865	0.537338742435	0.0798344925477	0.327502318799	0.429483098303	0.486694452301	0.645418849375	0.0568589537608	0.00867584205115	0.101567843552	4.94434116666	5.23744407169	4.96958299345	2.04673685068	2.70619804972	0.266026617674	0.652987419374	1.36376164659	0.200844864729	3.06178003498	0.443064711412	2.2809383931	0.551094800355	0.494974046803	2.22635977417	2.79456251104	2.17905181102
NUP133	6.82924575951	3.87354624393	2.66920056895	4.67592723539	7.06145529354	6.61510609384	3.09605963945	5.84244338637	4.75128212285	5.67462744061	3.63113441915	3.59963012632	5.44194504335	4.76189293051	4.06096838115	4.61756230058	3.8646285112	5.92805618179	4.08207184162	5.12557376758	3.7331225251	3.6311788895	2.20106076221	3.02680444822	6.38607432522	2.93885749919	5.78548097633	4.96331051717	5.74090713829	7.73903354226	4.88713892805	2.45409379882	6.77504339005	6.01121596773	7.85741193786	7.99576302549	10.3598969231	19.448146124	9.28410102318	11.8244003008	6.55345562154	8.67255660656	6.47925664264	11.6762300584	12.5915566481	9.97093689333	4.47144296874	8.93311799758	13.1027266029
MPI	3.16447879641	4.36255989694	6.78292606239	3.55594865723	3.63512269118	3.26317704357	2.55320428637	2.33832303596	4.17722522796	4.24444412274	7.98016402913	4.48181627793	2.65713021014	3.61148095756	2.63770980385	3.55308847506	4.94552400123	4.59635566051	7.78956412772	4.70191656791	4.73365442298	4.88538035485	4.44625218994	6.78775245883	2.64451995224	4.97846759203	3.59495034628	6.36858451039	5.00485129198	2.67256682022	3.64565754944	10.8477148288	3.72729183594	2.00669779862	3.08126006395	2.85781639893	10.8180381456	7.62443962835	7.69729124406	3.25315116535	2.54062125339	2.48374131996	6.25943042368	5.18756962119	5.16191711552	3.35660122954	2.82790252653	4.8993942471	2.24934104318
DEPDC1	0.0747642906955	0.57745781662	0.478275509097	0.0507339965479	0.0559381490837	0.0408621513705	1.41270330536	0.0318598406313	2.55899368949	0.201957224353	2.04171938015	0.938769550417	0.0419310130413	0.0376494923478	0.141563680423	1.22283503198	0.865041018733	1.48377909785	0.646732249246	0.870227804711	0.792048232221	0.572599516619	0.391958552436	0.947382106279	2.32303252076	0.821252003695	0.160114582587	0.618915479198	1.96754747871	2.05949987496	2.30127298201	0.674261725639	3.61770860535	2.63503183501	6.97688444261	3.62964059877	12.7934711	4.16839643963	6.45426468755	5.86251195637	0.917749451331	3.40277520613	2.52452704236	6.23828895314	7.02881962895	3.23215522207	1.99638968475	2.31942307176	0.11564525194
LDHAL6B	0.199889595631	0.0794908823326	0.164956202666	0.0230771346685	0.041068030241	0.00678564795352	0.0	0.0170930527591	0.0752624849304	0.0387680124608	0.434151787864	0.111923817543	0.0381459258321	0.0410297184771	0.113133880457	0.0241380758578	0.0225123739304	0.0501393780231	0.0663338174411	0.0	0.021834864149	0.122254693858	0.10595948175	0.154063503176	0.188868575297	0.0	0.017632663828	0.0970042405725	0.0655811670336	0.279917558542	0.0842986424935	0.163050050089	0.187251021447	0.0706253920346	0.175375975371	0.0983595766364	0.156983392257	0.105146123778	0.103102007998	0.143253645928	0.292725755297	0.988318529943	0.129150877189	0.0475886011989	0.387754239124	0.209864955891	0.0349849801244	0.0287336610486	0.115225646351
CHST2	1.62806667204	13.4421418291	3.59602361758	1.33301594923	2.90585891541	2.18629963579	1.5037235115	0.972617830957	8.70411788018	3.22775714281	1.9833058381	7.22672572821	0.970172219377	2.01931762166	1.42886012488	0.552963175576	5.12393815442	8.14401376914	9.90189301241	7.1244563551	2.73900071779	7.29273647624	3.39046753938	6.02138062842	0.43615574255	2.36135342602	1.9067469575	5.40318595108	9.95613395337	1.60038968761	0.168196213314	1.30002907565	8.7651597291	16.5270404887	4.14069108049	1.13117001441	2.02722877871	0.968021676836	1.432961439	2.76373818183	1.88196722931	5.61577053163	1.83986602098	2.92890525452	2.71191620334	1.41515713846	2.60255063988	2.41531755899	0.761021763312
NUP37	1.87501647249	2.53714849163	2.3992341161	2.18172103488	2.27977550406	2.25024678063	5.97594048884	2.26237713679	4.81132769551	2.17089212732	3.34482237723	2.74029056888	1.71377745099	1.76244260184	1.81004489325	2.64870682399	3.4489833632	4.18109573964	2.34768905032	4.84441045421	2.74178238147	3.38507951841	1.95211835594	2.98773781073	2.80262646014	2.62273835773	2.06023942339	2.55136847836	3.89094031201	2.68563574495	4.11150937434	2.47552333463	5.95199316823	4.37521022724	5.44167745802	6.07412284318	12.1660353271	5.62023646278	5.50232359776	10.0706246479	4.12514186371	5.03116962988	7.62862399985	8.5300562402	9.45331002482	8.05499002022	7.18036995183	10.3157011108	8.64844245307
DCN	193.989021266	42.8742574462	41.8798793274	65.4839601936	123.790405024	90.7530547431	155.477965658	97.3733272004	77.2275204632	171.76090769	31.0730511652	20.2805835418	92.1889873575	102.410130052	66.1443652245	12.189429565	38.7394269386	78.9154711751	39.0093266864	53.3802626672	30.3770957242	27.2525435474	40.8865968524	21.1441928115	48.6286113667	20.6181323467	182.836656562	35.8094642511	21.5325401795	22.8016516669	8.29177379465	15.9931276093	19.3184311358	29.7300978763	10.5326130293	13.7745511766	17.8823133918	19.2556924761	2.45087889675	48.1569769191	67.7778722218	68.3182645505	10.9049174204	7.18512787504	42.2880127675	4.55869146169	19.4896194668	6.79878970053	2.5728467699
PPARGC1A	1.85849032543	0.243486837276	0.702245010468	0.755992353728	1.73820437995	1.76707511678	0.636893093776	0.724129017786	0.631319606967	0.620918878018	1.80235480483	0.562185510116	0.839692310086	1.12342690823	1.24305153349	0.436101972544	0.818720363982	0.498226742793	1.1054680187	0.563477948527	0.632544162905	0.39140122038	0.658476280025	0.65853919234	0.507430091087	1.21427435174	3.19392751961	0.596781332284	1.29210283783	1.81042674961	0.501546677693	0.979712669387	0.0929612174838	0.207775672917	0.121095470709	0.266175990008	0.633258295499	1.70997793321	0.0296457489845	2.17539293461	2.27048005935	1.06919212486	1.32425194507	0.999549503579	0.310590686899	1.93939417104	0.0417749199959	2.91787023709	0.465483917882
ALDH3B2	0.0409343158207	0.263470707057	0.0	0.0	0.0268656009266	0.00710238144377	0.0509533225093	0.00447272617018	0.253206995558	0.04057758584	0.053703789232	0.117148082287	0.0	0.0171779445766	0.032294898347	87.4076760911	0.106034325063	0.82393179709	0.121502638407	0.319026947503	52.6157353731	0.255922345226	0.0277263373421	0.483764162368	53.2688824739	0.152657250352	5.3029387079	0.621884141049	0.223087466034	58.4385956805	44.2578973932	0.0269464314456	0.342984830783	7.53593430504	14.7002564028	0.03860651389	0.164310901448	2.44870208539	0.0415055759223	0.0	0.296176329889	1.00998689455	1.05514913718	5.1909024142	0.135284477452	1.43694783979	0.884934347846	12.3006182723	19.059205689
GALE	1.49429346737	42.5024905665	19.6336722042	7.6705251393	0.939451839339	1.08585378242	44.6021407212	1.01481299542	24.8469177383	12.2809845232	18.1411512181	38.0236340345	1.06336323137	1.33408676279	9.91426182694	16.2552182204	24.5035560537	56.2108130351	28.9650665923	24.0715166221	14.6406743575	40.5548582442	34.0199510618	42.0800864428	13.7852932135	43.224803801	2.29381394105	57.1784887671	57.6461405092	8.08205194229	17.1777746892	25.7044773296	14.5687490491	15.9738985649	27.8525602226	17.9478719813	17.9486890504	11.0194948305	13.8894737134	11.4401020982	2.40857322069	10.2312784101	38.0849278021	7.19569694213	17.414026262	10.4053820117	22.7359365139	17.5911005056	9.46758598122
NUP98	9.78035579001	7.57921553932	6.23421385066	6.76601396473	10.8135440578	8.57113313189	2.30983937067	6.90376234757	8.27899817375	10.3095352174	8.75101295741	7.34130692726	10.3483991642	6.60760564041	7.25323419359	8.44957914699	7.14555021829	10.194886051	8.40714668309	7.85766739608	9.47019721839	6.06919504377	5.44416500985	8.86548228119	9.98440164595	5.00849026113	7.95252305229	9.60415677469	11.0678622641	12.9356597758	8.04002238988	5.14845510853	13.2903468358	9.66261208032	17.1911923609	14.2481617214	15.8806341098	24.5826630434	20.0029889988	61.0317432285	9.06612299988	13.8714288544	10.9504043572	21.4854418235	25.4138505366	20.5106878048	10.9967876541	15.600635944	27.162825494
G6PD	6.70820128967	21.8007513238	11.3026847565	7.41925420543	6.1111310635	5.77657325495	3.90197493995	5.42646357571	19.6211034616	12.9416315036	10.5643552054	26.7447982186	6.12611672902	9.63009860903	6.74146933023	43.0877257838	12.6342641209	23.1336574378	10.915418342	15.5037085173	27.5379434582	19.5190142661	13.9584204884	21.0188845229	28.8004426885	19.5848711858	12.5369697717	18.6743689984	26.3951864373	35.0191776983	26.9658925048	10.7916801149	19.2258780927	47.765189704	45.6854699545	13.7637192255	15.75003497	24.5452957318	14.5782544342	16.3659745144	8.21297918268	15.6948886627	32.0141330836	24.834638414	9.89897906085	39.4553119175	31.9489428639	27.7855858066	30.7158207752
POM121C	5.56186968438	5.18080261535	3.90398018807	4.30343330349	5.72594302417	5.61497855675	0.597892226132	4.1557681928	3.84735166105	6.22752969992	4.05172379995	4.39297792232	4.48366988875	4.80942525638	4.37741316908	4.28996502268	3.65396988006	5.27112129931	4.81967164242	4.16882725576	6.21939966707	4.46728471645	3.16340842278	5.4213451686	5.60243810313	2.95989201681	4.72053850886	5.54483187745	6.46043408992	6.57764335352	3.16137313313	2.33995757739	8.56091400724	4.54010735953	8.18451224554	9.12199806646	5.00048329714	18.9105589457	9.75287768537	4.25034330783	4.98580710254	8.44532106197	12.6946605973	8.85377360459	5.12924067393	14.7349899122	5.33045874252	8.41471343531	16.6842919486
ADH7	0.02840465716	6.42291273983	0.0299518287338	0.268173927027	0.0447414254813	0.00369630051007	13.9589151728	0.0	1.04250095991	3.61818983048	0.176294477893	10.7760075074	0.0103894871998	0.00446996868608	4.20742015822	75.030135885	1.33053707319	5.00903679104	2.93585301653	1.63865930673	36.1992646397	14.0071440496	2.11250068703	0.94179109819	74.0082632179	6.3846970446	3.25606880722	5.11231542672	7.46623018008	86.4548075575	154.353586388	0.948941241016	0.0191249987518	0.436008024056	0.0254750344319	0.0	0.0128268765971	0.0	0.0	0.0	0.138193932826	0.0	0.0	0.0962840157922	0.0704062555595	0.0238163187958	0.0635237787974	0.0	0.0
B4GALT4	1.68243825585	7.88570320126	4.05627828226	2.95824319743	1.7369880018	1.68985237041	5.86435302622	1.80638041864	2.37438505792	2.70528833881	5.33811097383	3.60012083776	1.78061124275	2.91463979732	1.67908988451	2.75488811324	4.20074753507	9.92494567195	5.54442787898	2.82607769999	2.50926747754	5.11770068821	3.80370811678	5.37842984873	2.95684205368	3.10401457109	2.04445451811	9.21125862144	5.37274284586	3.02482206666	3.19192060998	5.32139850445	3.26388915017	5.47593628434	8.1503495254	14.6989258565	3.56533671719	5.29220405738	5.85378203231	3.68290186806	2.56635885761	5.71528233271	8.43769563262	17.4392437231	7.69587179384	4.98101524526	4.32719891463	6.46118091803	6.24205507784
GCKR	0.0888616134039	1.95350654154	0.394533942381	0.252515885635	0.0939271279692	0.0292132281889	0.523947864964	0.0413933319914	1.28449295755	0.678039722068	0.569222348138	3.14707468435	0.0444773088386	0.0176639067722	0.625427080167	0.376702832292	0.726893497728	2.25571101101	0.776412452696	1.67591877308	0.282007056612	2.0175780988	1.40842919399	1.18835229579	1.15069221527	1.69819390804	0.0917260962032	1.56606655393	4.24387384727	0.523261420624	0.725836499639	1.02522349392	0.749461648478	0.185810083473	0.157295786344	0.208418111977	0.0718076766141	0.103736822585	0.0085359528359	1.17839166349	0.147026612673	0.172494280634	0.428593986969	0.237802543771	0.978749898487	0.183523435084	0.571084021287	1.90966048543	0.0348794734077
NUP54	6.20855038622	5.79792249214	4.52999657286	6.63984234418	7.18047008753	7.13834795936	10.1773428799	8.15365758456	8.07966359773	7.16342901509	4.79353050121	5.24797885246	7.2207191811	5.2123136186	4.69387107283	4.9765953916	5.98630736163	7.83659222611	4.96959422422	8.17458319556	5.16001058035	5.57668742138	3.41820279702	5.25112205278	6.36776339875	4.98466134919	6.38393010319	5.93315738816	6.87097333978	7.29781358713	6.88642292992	3.67686334674	9.37019473556	10.0670915166	7.09020631498	10.4999120473	22.5239574112	7.22727956205	6.06233793431	11.4594125239	7.48297927821	7.05553946345	6.41758473775	12.6713746987	17.0154344123	8.21849448218	5.65757599312	12.0118233431	13.8491716969
IGFBP3	8.09554478414	33.6862250387	34.8655798955	7.94041745247	10.2177973505	8.96479102638	20.2229066411	7.09693753182	22.2168565803	43.6101818854	13.7323606702	16.3743981895	8.64188953663	8.48877857253	10.9707981083	3.86515670299	17.6976144473	47.4180328419	33.5423057394	18.3914636716	21.6695549768	26.0010732529	14.6972940877	29.4058502017	4.23964264672	18.7987835595	28.7353400542	28.9851419036	27.5264753482	5.12920587473	1.34256330669	10.8257430797	39.7093549887	62.4452569468	9.59825564138	56.1891373793	48.5990514838	35.6368779215	102.510899998	30.7244104394	45.340958892	57.2524970608	40.9757395236	41.7957921953	149.463038629	10.192275691	28.3298153933	14.3831083224	15.4757830045
TIGAR	2.19998438929	3.16078151804	3.04860671081	3.0587063828	2.60471910062	2.39794652753	2.98805924836	2.68995344632	4.4498335137	1.7984463454	3.59408431228	3.02439591947	2.44252960467	2.62411855382	1.49758733045	1.47349259165	3.73191562124	3.58862936875	2.45187168152	4.49757380485	1.95654250767	2.17574441344	3.14510034336	3.69093842348	2.97300210185	2.2870813326	3.69653855373	2.20021212743	4.32472869138	2.14107910764	1.85065497462	2.12426364158	5.55800426841	4.97049656472	4.11858749685	3.38085828455	4.13209576755	5.02003176947	8.73224869077	6.88812352705	6.41544207923	4.86554316864	2.58377468588	2.59661812995	8.47949372283	16.3076629614	6.45262063011	8.95519287409	6.83221284005
SEC13	7.32708719296	18.5376381783	32.3405833216	10.7346912103	8.26652468613	7.33247199796	20.3696806588	7.74475203874	22.3105925224	13.7149781343	24.0973737278	19.2844624592	6.95299738223	11.3518819151	7.06596681041	11.8410159953	25.187349097	24.0692086359	29.1377809561	18.7446606087	11.1354058427	20.2864172064	29.3492393903	30.9819523468	8.24507296344	16.9655041175	9.16502221216	20.9808585642	23.2898747105	8.60791939827	9.52848328924	32.5653388359	18.6893027648	11.3948221342	10.1914545202	20.5133967669	25.9428690142	14.0989123208	13.9398755503	15.9620117568	8.5600442765	14.7578488488	20.9065703067	25.0629558837	13.454705249	17.2235699165	21.5413216407	21.4959256602	13.4146793459
AAAS	6.40387045635	8.08725919016	7.05638448253	5.2558573884	7.56946421621	6.95171758608	4.39769778015	6.50033140876	10.2846967747	8.55190844555	7.51522105162	9.26141866165	5.57423857602	8.09454077155	5.68488677308	7.9236257582	7.62637405151	9.87122458123	7.96543629394	10.8384238246	5.93178013601	9.6591581512	6.71951604725	8.97866475872	3.88295396892	6.31439191628	8.73872489886	8.60233394416	10.7192005455	5.54236018251	3.55931766547	5.59306135098	11.9800323259	7.49030621533	8.95470238827	10.8075808613	14.4543710343	15.3039890945	13.2972611206	10.1144215441	7.0820627066	8.46960952004	12.0651617554	14.5664574702	10.6517960924	12.7184667663	17.4911880596	13.0961194309	11.2612428658
TPR	10.8821162545	5.83898077034	3.1758736465	6.95660131152	10.7824969674	9.92348760965	1.76445786053	8.83504119349	5.47704386402	8.62102709205	6.21127556443	5.63090991721	10.1290282238	6.39512447895	6.83522177257	5.78407714354	5.11059689476	7.10430246835	4.41028576275	6.43829063336	5.25312355323	5.05013187093	2.45770744295	4.72614156461	10.7882467551	4.14779918865	9.71301116931	6.52923368672	7.38656946836	13.4616803477	5.75723961033	3.27864431659	13.0849308059	7.54418277333	12.0768062116	18.6099300645	8.33579969762	17.9754074209	11.964755238	10.2692341326	9.73512948357	12.8471470554	10.2844348233	17.4378082908	20.3065893312	13.0456977504	8.84846632728	11.1570886396	26.1873128199
PDHA1	12.8142366695	11.9511790456	15.1386528586	11.9942101978	12.836327916	12.8713788992	9.50923043933	12.6722844751	14.9454745031	11.7595297802	18.069482971	15.5621436732	12.0595377235	17.686630427	13.808177472	9.78061796797	14.7856091073	14.8120627916	16.3155760235	15.484927255	6.32287950495	13.6971332783	16.9926841193	18.4155168176	9.40678672392	16.9068607464	13.8951016045	14.063385707	23.469778048	10.647451805	7.69334590291	14.9554543729	18.949166246	18.58125648	19.6156772886	12.1565694067	20.5703360995	10.7237969208	14.9750649113	12.7545073577	14.3024296867	12.9537138854	16.7597305076	28.0017602779	18.4827938448	20.0366091043	10.1022913076	21.9086043584	15.4025311789
RRAGD	3.13592567311	1.62296758053	0.703560898137	3.0426828968	3.68408854189	2.71800520157	0.64997633406	3.47753136962	1.30276130792	1.96480012101	0.56385883656	1.06474372207	3.27022219375	2.62952605861	1.68905119963	9.95861245269	0.88670879132	1.16483897924	1.0849476525	1.62784254759	11.2422536611	1.07007138147	0.735666319824	0.674243828502	8.22937338123	0.955968420705	3.94928213854	1.7970551953	0.785323807944	10.8138286373	12.3921198358	0.352330435211	1.45710469591	4.15955214859	6.55445463232	0.829002320967	1.13970035632	2.48896789251	2.04106042748	2.02539649864	2.4101779755	2.00834225976	3.91340342319	5.52562716752	6.08628208795	0.35901410152	1.32737143997	1.31398148211	0.473557925826
GLRX	3.8954447112	4.58381542818	27.4159563257	9.52726455641	3.98227217348	2.48720585392	9.93866947447	3.03925798132	10.1055019138	3.81387272391	18.3292713511	8.73480438382	2.55195052001	2.2649224185	2.45078315088	0.435365631267	13.5663498398	4.29125432403	15.9101885371	11.7936803241	2.85711613047	7.35014288634	22.7406664333	13.6889625834	1.2423510875	6.04304178748	2.59623363879	3.75367880597	3.98359739344	0.900645361609	0.539467271487	41.8155403596	10.7409378362	11.2644365247	5.02304226275	2.00221361769	4.10012253571	1.53631875144	1.32454956155	5.54467802466	3.19322657897	4.82935835097	7.08160331473	2.65280649628	10.9396911009	4.01042509143	3.65558458705	7.97562631555	4.04287230706
ME2	5.42469187605	5.81164126085	8.47751595702	5.1867456071	5.64735418541	6.26489893591	9.10521669656	5.92184550072	8.20028645141	6.2236751687	11.7668122012	6.25855622061	5.46854758851	5.06711983763	5.84874359891	2.17793607297	9.38283670757	10.3226703	10.4800683404	8.53777333571	2.17345049288	7.3268655317	9.59885621107	7.79080635215	2.1466254575	5.59091078908	5.31596722931	6.65647698817	11.9575758793	3.9425770608	2.14617519227	13.2407021425	8.5217301391	5.48131808187	9.6190497681	6.68723261564	16.4905218874	2.4985362168	11.8653682827	7.85226518763	5.2788971965	5.64855516874	5.75257750455	5.83410939235	3.23521368866	6.50165204693	7.47090929885	7.48421339182	7.76229648539
NDST3	0.048282648795	0.00960037550214	0.0442717856588	0.055742030238	0.0123998029672	0.0147514506874	0.0658489364088	0.00619315272958	0.186988073764	0.0452606912015	0.0190668874266	0.128415374479	0.0	0.00594635297889	0.283208150506	0.00194348991426	0.0163133609919	0.0508661808206	0.092130564893	0.0704223385269	0.0448301630098	0.0360924710089	0.0255941507495	0.0372135127517	0.0114051397481	0.115296329239	0.00425910969623	0.0175732821325	0.340579496282	0.00889646444442	0.0162896392343	0.0207285170796	0.00848059582258	0.0151638418813	0.033889174068	0.022273518411	0.0322309816847	0.00423294781842	0.00957843758801	0.00247160204793	0.0942758745838	0.0274211107054	0.001733108504	0.0131369874373	0.0312202371635	0.0337947753197	0.0338020096166	0.020821552927	0.00173952257163
PKP2	4.25343104706	6.44260076306	11.8824598964	2.43341280306	23.2681966409	8.08881126581	6.61395540602	2.85153281199	5.23365162266	5.66289123055	19.5459850027	3.92802859187	2.4910576806	14.1688195377	4.52676148789	1.79098376675	11.4048124241	12.520167899	10.7033212272	4.75285928476	7.66831562277	4.6334523186	9.2789378629	14.1757405299	2.2894735966	5.6477448599	0.235945888436	7.59581561884	12.6509590969	2.31608001228	1.19556133789	10.2110829511	15.4220644485	4.80825472784	12.3393445618	17.7209727463	44.7055423255	9.19591656098	34.6114101855	22.9487249999	7.73083053366	13.018332108	5.78478447682	25.5539243851	14.0878089003	12.6959408677	11.4119733527	13.3512549204	18.794824633
HOMER1	1.3675960835	0.685209511222	0.589944924356	2.58178412807	1.24278506204	1.09579393327	0.423200710663	1.28375381242	0.783837168661	1.78643744778	0.249733159034	0.207838382503	1.79450113197	0.864622977744	0.77243529817	1.05362923385	0.411853162621	0.662093990197	0.524653176255	0.473946894818	1.67592339554	0.463387361264	0.781221317805	0.485058311131	1.37319704085	0.328287281295	1.52639921291	0.467012209548	0.656268575201	1.6455157382	1.40073824264	0.233723292897	0.431428148638	2.72875724796	2.86265039985	0.125149135523	4.68147229885	2.54551350421	4.48804837325	1.92263931247	1.05763391434	1.99877350598	1.91270546342	1.354075661	1.4527897231	2.8073657998	0.96566466128	3.28048855775	3.11246747316
EGFR	12.4170582924	6.89797806578	3.63426306262	13.837083302	13.531735355	10.1993356643	1.54647127501	8.2421583375	2.66419673432	14.0002167741	6.29790898657	3.68784056607	9.67395365327	10.7509765175	11.4299920179	15.3266315222	5.01229642234	4.96177830368	4.34317995564	2.65194233598	19.1819837486	3.47596917537	3.14322454527	4.14334528076	23.1145069824	2.88886053178	28.8010614968	6.92467402064	5.11413183592	28.8130551064	13.3148772491	3.35387886137	5.36879927925	3.40002633684	9.62749922494	5.25241780335	3.88375773918	1.5508498903	15.2503401859	10.1393224371	9.17933553528	11.6030085857	10.9467738333	7.51976374723	205.955262154	0.37007703876	9.53266613976	0.878264379934	4.29237924803
PMM2	0.935358486686	2.6522469951	2.33385276347	0.666065371553	0.83442904832	0.688234232736	1.83699890865	0.535618465982	2.40957525238	1.69701797872	2.77068809873	2.02003824495	0.627930006223	0.676006607665	1.09325306634	1.35951936917	2.96631814169	2.7580999609	3.52554044509	2.44168513022	2.13239940181	2.18694022239	2.40984848232	3.90457664709	1.67002489367	1.58556959772	0.645591520863	2.32540227705	4.00655358313	1.60843282723	1.66146063505	3.43593730005	2.41545857355	3.14887937143	1.95351860995	2.69823509444	4.23602692017	3.19972124569	2.90319423798	2.95711101032	1.31810189347	5.44796504612	2.79969181465	3.4702063294	1.87480484883	3.56114682813	4.66915478535	3.33745889306	1.96480451066
GALK1	1.77621955403	3.1421720186	16.2288145926	2.5541862054	2.28473768378	1.63320993288	3.84289570619	1.5915695583	6.10746678745	3.64004057319	6.50402000209	4.17841498533	1.55253654242	2.8400427678	2.55372848891	6.474064058	6.63129189875	3.40013662325	8.24501702142	6.07655582663	3.48438284803	4.29561805675	11.7276364898	8.68128507703	3.35760393439	3.66490690084	2.74324035387	4.58714129284	4.26295733395	3.7788488204	4.13688516981	13.2923533752	6.83980342768	6.84720762461	4.13546781707	2.96642072194	28.3561555827	9.76984855027	6.08885075962	2.92419504391	3.64560176378	11.1217641499	7.32370948821	12.6243785295	2.5086155561	5.64311815543	13.8837447891	6.13334456333	3.34012883223
POLR3K	2.66387265423	4.25083349537	3.81100155629	2.60601811181	2.49366536245	1.76365779552	7.27747774467	2.9183650345	6.71642688725	2.31057559497	1.98089718965	7.52330689914	2.24500923406	2.37550558203	2.19382487068	2.09845365561	5.1046599329	3.63090848759	2.88337899259	6.60368966092	2.19176262598	6.12372977712	3.89357623438	4.81739111907	1.49926483208	5.84658387808	2.1123508107	3.84706031421	4.5625302213	1.61747519601	1.97946064882	1.7458952885	7.96106168263	9.4805439202	5.31789658016	4.73276381775	9.21552347407	4.09142641241	4.75526680756	6.84134474879	4.18015684449	3.58498254276	9.71659988849	7.43953109991	3.65724903151	10.2508865445	12.9496098294	7.88020273981	7.11272085886
GPD1	4.78533422869	3.71486261441	53.5154449795	4.69566011543	1.11495946196	1.92859642449	2.80023680429	0.366172935408	1.94296663409	8.36256918853	40.6913309798	1.22257350158	2.2600401712	0.553478668388	0.257411082143	0.160418511157	23.0151371197	3.39884177537	63.2144908676	3.34486858599	0.342710529981	1.34262331444	49.0882401862	32.2487780229	0.0829802810015	1.23739966146	3.90448412112	3.20967125647	2.05518946475	0.240609350308	0.0786716922654	61.0449483557	4.11064317947	3.60846813571	18.184684059	0.265994140739	0.962269646874	2.12609800555	0.107658662478	3.80673348214	0.786445282774	0.0623208163744	11.1398968846	5.0814310135	10.762154508	2.5186840229	8.16737845986	2.09040443964	0.180242172029
CHST12	1.89035694332	2.03830369798	1.21867558423	1.42470202075	1.82725195612	2.05665704872	0.55342889852	1.58648370279	2.3961398337	1.78624243814	1.32373203583	2.8288653018	1.4935426857	1.53444945499	1.46909478577	0.950150705012	1.40478858906	1.86672355092	2.11659755177	2.67401994812	1.07855951044	3.08855274352	0.98568048138	1.66242077455	1.03211877008	1.43226050986	1.65875819706	2.10588076026	2.03326043671	1.16498570886	0.518072939481	0.829795294965	2.45229327983	1.91508236345	1.15750678656	0.903893770017	1.33191019278	5.06608794624	2.25489332102	0.862792593581	1.4142312675	2.15984359733	2.61337871605	4.36058832392	1.56369663667	0.809770772666	1.15330660934	1.93463350032	0.88970733717
ARPP19	32.1627612581	15.4643821071	11.1658096545	31.4273808243	34.7012639623	40.6260608157	23.825506942	38.4250405103	22.73438287	17.6239223978	13.5378657874	12.423357666	40.215717775	26.5460926114	20.1839068274	14.5652343941	13.0562118776	17.8018770739	12.8384730631	18.1186976338	22.4673775795	14.1402666148	11.5875647077	11.563931859	22.9403165565	11.910152667	32.9580072196	13.9072800374	19.9039837469	29.4729623955	17.6411087883	11.1028296581	26.0351148976	18.6825632151	22.0290581609	35.8287555877	53.9480145301	44.0741720478	28.9311565704	45.6290436661	35.8571092556	26.6923729256	25.0445952541	20.3769104568	20.2580080963	35.4770584218	17.1686121958	29.9352427689	67.6825880622
ENTPD5	1.70966534012	11.9377143651	16.8349997605	6.09689863894	1.32638777235	1.14006600297	5.98732222427	0.704015890363	2.58686627952	6.81384517691	30.5353905808	7.6085091894	0.878378639743	0.779027813627	4.18238225276	3.79691847968	11.0679194026	10.9331882336	21.026409281	3.5991715539	3.6222038953	12.3152440212	11.0288445709	8.10598398556	6.07684504539	7.3102163132	1.27511619022	14.596829694	5.89697368033	5.3397637331	5.6625020134	34.3919073448	2.45879047446	1.67683798713	4.3539776764	3.17474629321	3.91655867317	4.03625094307	1.74387402804	4.69681211424	3.52704404227	2.35827566457	5.52301571095	6.46398590789	4.58108046339	1.66456586684	2.82290149611	1.05925579758	3.08243868973
SEH1L	2.17735071521	1.72700597077	1.63129301661	2.06512282249	2.6833457559	2.46729487348	2.31815011469	2.08873239575	2.70410382787	2.00599527836	2.07835985857	1.39661029811	2.48214870929	1.66351413594	1.73608316604	2.40180418425	2.37095399197	2.53499739232	1.96618915774	2.5173779427	3.0561403746	1.97259061195	1.76462621967	2.18719739532	3.25346181172	1.34501139148	1.50765304135	2.26418966771	2.52783847246	3.7754685261	2.95212060467	1.24063665403	4.34418662611	4.58100480674	5.13218886703	5.04445924343	12.4645225345	5.4972498908	5.21145452749	8.95015066813	3.02303044154	3.33525424032	2.3967880278	5.01741812886	2.47553795428	4.64565327336	3.04031193461	2.60612331831	8.51170302223
PGP	5.75163580046	8.31551292573	10.7302453898	5.16725281644	5.51993030083	5.19850306192	8.69201648628	5.02471503302	10.5131507415	5.81650503542	7.47344027537	9.78008745921	4.41276229195	6.46490243355	4.0673472405	3.04207912458	8.49061984103	9.58118835369	8.32904755396	10.2759296471	4.36493907274	8.39108139664	10.3476175392	13.1355284783	3.22032595926	9.89437507544	4.06128677975	8.38605572645	9.98527377961	2.37348080029	3.20290327341	10.0107343271	12.4969628807	15.779786768	8.78649071239	7.73991941377	10.9691008405	19.9695475711	18.6856139392	5.25357550038	6.057752154	8.33717875888	17.4927293437	17.5620187078	4.41336462242	7.77941058051	25.498906038	10.8102418123	8.66025362877
DHTKD1	4.45782614168	6.12452086044	3.56073419965	4.13309544616	3.73906490366	3.83299293658	2.87156368968	3.66595003537	5.70107571826	5.24684538372	6.07844789176	5.98313976555	2.95736625265	2.51230692216	6.54157698562	3.83043976547	4.51789795762	6.34595337415	6.85812664632	5.16608121408	4.74942612485	5.40860692005	3.10814814206	5.80060159054	5.04711633538	4.99023467094	2.80564139954	6.04854778863	11.1375815449	5.97930954155	3.79427216143	7.78564436047	5.76658729642	6.07038833488	25.064033029	6.0739343439	9.33551785903	6.75566168136	6.84955178309	8.37469990511	3.36583438239	5.02017504228	4.4117840738	9.45878642955	3.74106391972	3.8265035859	5.73864747985	7.72386762321	8.9416457068
SLC37A4	1.00849849036	3.78179007792	25.9386710334	2.23158553365	0.800821610548	0.817129788803	3.86904244354	0.678320086737	3.23094745998	4.20161025834	14.1870782147	3.75236992074	0.466314313294	1.20376126649	1.90561739938	1.63832995182	12.1222455599	6.21893311369	22.3934592849	3.80460342343	1.58359240642	4.34966627403	18.4348275517	15.8960112513	1.01533978735	2.71431797061	1.24665251601	4.38711713992	6.16079459169	1.01405514398	1.00589838925	35.0885139442	5.16957434737	4.16431155149	4.5197492284	3.24041022077	4.17176639965	8.86560778092	6.21864034403	4.90635301276	2.64910025913	2.15657354009	8.23569631006	16.1555498219	10.0891276456	3.8290911771	4.39482270449	7.21906060887	3.99117931647
NUP160	4.0918803166	3.19340438212	2.43146263408	2.62103974671	4.80762685312	3.68648048782	3.44044842571	3.06560891613	4.75233221389	5.02308102435	3.76796956842	2.96073473593	3.58072416421	2.83490667952	3.3541480419	3.13069098819	3.33981541182	5.30933217061	3.60441264499	4.28260213224	2.72851527841	3.0731222458	2.00181504538	2.94676789859	5.05075963999	2.12016317185	3.9020760196	3.92090948105	4.86625393211	6.45656757584	3.83753252817	2.19894422483	8.03306145099	4.31125542849	6.48686135476	8.97443325997	15.3061132182	15.0298277701	6.3816081312	12.9057343726	4.7809438535	7.08179600271	9.36972596695	10.3527736726	19.246127919	8.43267643244	5.41464364959	9.53805937885	13.476089273
MYOG	0.0770346199417	0.0	0.0	0.0	0.0796297818039	0.0375919567582	0.0	0.0284082509697	0.0	0.00715905814749	0.00874606112391	0.0	0.0352209055594	0.0	0.0227910113771	0.0	0.0249433567174	0.0	0.0	0.0146831916568	0.0	0.0	0.0	0.0	0.0	0.0	0.00651223818955	0.0537395874637	0.0	0.0	0.0	0.0	0.103735595324	0.0347785889222	0.0194313826115	0.0	0.0434837832284	0.0776668357573	0.00878733888146	0.0	0.237846061994	0.0	0.0238495238964	0.0150649779038	0.347792157699	0.0871976530571	0.025841872317	0.0477546676916	0.0
PPP2CB	20.6954973475	17.457997277	34.9741322747	29.841460504	18.8100194969	23.1848010394	18.5419998108	29.8869226593	13.3860491011	21.0133258123	26.5504076831	11.1401250294	27.0279426704	15.6676995152	15.6425672568	20.6198960697	19.8880298317	18.7403253083	20.7149084121	12.9071107131	20.0753227021	13.459323169	31.901600804	22.9422670353	21.2186827196	13.0728673691	18.0439065368	15.491852165	16.8258224629	20.4601665468	25.2062797053	29.8454352681	26.1927784056	11.9056905799	10.4953446964	16.0931750407	20.6833214709	10.403108049	8.82451189342	23.2385990105	19.7165747936	14.2095601335	23.5819050581	8.09192136877	18.1844578409	16.128605163	16.0358774516	15.253069271	14.2792619981
PGAM1	18.3461787123	19.704576318	33.1084342356	23.8809312788	22.8173168411	20.743897549	14.8915450194	21.2925888465	29.5795005506	21.3967298233	30.7819119802	16.9711897636	21.4222325408	31.9455502741	11.913344447	52.5780681696	21.0974563258	24.4212431521	32.3505675149	24.1046318511	47.0213501855	16.1376301686	23.9325581511	28.3942129355	40.5474175646	13.0419593899	39.9074216598	21.0401366769	24.2983842184	31.5515973079	48.6618115595	38.2903754125	28.0382610205	22.1061541268	13.6546928569	20.0453073163	52.1248101905	20.8998188661	27.1782810393	20.6964063307	14.9627468958	15.9369691466	18.9684204023	23.9201578363	8.73415920312	34.001289625	36.6571386552	30.1480721569	25.8469454079
RPE	4.9087150995	4.38149289641	4.48447420081	4.42241419994	6.40598888465	5.84842897775	8.7611937777	5.3489461803	8.12457517416	5.69935830738	6.52262465134	3.77951827733	6.33525088468	4.91883882947	3.82656033608	6.12251579806	5.16187257343	8.4644950619	5.24527786957	7.27479189225	4.2560719305	5.26943648615	2.97963658498	4.35291852022	4.76635750819	4.94585533779	6.60837228607	5.24578937253	8.89381966686	8.19365183642	6.98594961392	6.23303271591	7.59461194044	9.93200267164	11.9793094514	10.1062579908	14.5111088639	11.6375219292	10.5792374575	13.5410227001	6.20067176146	9.37957241438	8.67422036454	10.6403742175	11.3698306465	14.4427350515	9.46238088585	13.8327817398	13.5043202048
CENPA	0.178077003436	1.13109819961	1.47091724126	0.0919438974471	0.13148293343	0.0231731759663	2.16121228253	0.0583732492609	4.1949902639	0.325468184626	2.39918173346	1.76778110305	0.0	0.00700588132947	0.131712047595	1.97150341513	1.72980858083	2.15746481919	1.06186793616	2.44385175993	1.07189583346	1.28730144191	0.651338224278	2.00222126913	1.8370737853	1.19991972031	0.125450075058	1.20086162365	2.30960301374	1.30182058429	1.97199308508	1.07700796283	5.12573113293	5.9961935283	8.4945943481	2.382795465	6.98273686792	6.5681154931	3.8662873051	3.91372139273	1.69943317463	5.92929155266	4.72907715255	15.5783571004	3.80705050864	6.54730420603	6.97931240827	6.32914308827	11.6696981398
IRS2	15.4530898573	11.2727181309	12.529477851	15.1307841376	14.0927408441	14.4187114374	1.49480819315	20.2192834718	4.66141211391	16.0241221388	14.1752134949	4.45892908867	16.6915065477	8.44348852263	12.784306689	4.96301243535	9.53538735496	6.77585698682	12.5130110491	4.73089620513	10.200062343	3.33743029006	14.4230137778	5.12812997546	8.3101592925	6.38836776135	14.8600216929	8.16297597966	5.79497812496	12.3300786192	3.30049799063	18.9632558824	2.81693511966	5.96031850027	27.0727758132	15.1728470074	11.4695793244	11.4238104449	39.9924253283	5.27494848763	12.5773852062	20.448092473	1.52998788918	1.03951679677	6.03273811922	0.665808048345	4.10244962538	2.13103101835	7.0055614257
ELF3	1.1192248627	69.0513414027	34.3570592341	5.86052890112	0.128111294865	0.238037435101	21.363549775	0.140849512062	26.2625134591	23.8997734368	51.7108583481	49.2953481385	0.260443682461	0.191263190788	15.0732542078	57.4863622296	44.4550902553	85.8822645337	43.6734483608	29.3279958844	72.7864847218	51.6747407145	29.6138450605	41.0796706434	33.7671091369	35.2617965033	7.25788085896	51.8708458087	44.0753606913	17.431047537	39.1813502097	35.7467433694	72.7073569567	41.7259397259	30.602270372	68.013873359	49.4438830483	36.1607001977	42.1222231845	29.8095506357	13.0667306112	52.1241307013	52.7280791471	38.9464811575	40.6980467055	45.151750185	79.5328523101	80.5390074443	26.2768012506
DPYSL4	0.250168472947	0.593228240884	0.517819588198	0.20502513116	0.218917428205	0.347247415173	0.0	0.282460544066	0.189134570465	0.416758168379	0.370286638213	0.223733103471	0.267732112839	0.520537423956	0.0877195601616	0.0986474114007	0.0420015968906	0.416946185483	0.0795598533022	0.664035322434	0.535407918827	0.26791758599	0.237227799412	0.136875268092	0.0503391841905	0.0424072193344	1.86418969534	0.245618341191	0.297149176385	0.0628265181773	0.125821563248	0.0228725088493	0.268255807429	1.20472331199	0.261760791451	0.327697503238	0.276149406235	0.368990832727	0.105691544481	0.13090774877	0.769799917615	0.395125142757	0.458968167678	0.0616070318058	0.354336772312	0.102548149495	0.845426291319	0.0459503351592	0.107488911753
PAM	23.1864975107	9.81266687135	7.62247292525	22.1082228472	22.0606156157	17.2165688468	14.832451126	17.9614565512	10.4656665194	24.8409962223	9.15204604398	6.36728663988	20.7349030545	24.9584213489	16.3631835484	4.45183959519	7.59597679179	20.1438641094	8.40432819786	9.82554170055	25.4389681453	6.50199674617	3.85912314214	9.25847461173	9.8086894627	5.43045073511	41.2685201446	15.8872105389	10.4270033677	9.0396180713	4.61742907737	7.03930082793	6.45069819983	8.26771901769	9.18324594129	21.8448178921	12.747844709	13.6051558166	12.3007963015	12.0202792032	24.8595356692	17.7724569428	12.3794288835	4.58512122425	19.7064769334	12.807678551	9.47208911041	8.58428030865	105.753091332
CITED2	58.4191356589	75.0664229577	17.4551932364	51.5841871251	47.0446558218	76.7640865992	24.7088439293	67.8029382083	68.7468701615	83.5682308043	28.9157546211	30.7028776088	33.7596283958	48.7311860032	38.4513760987	55.7880796212	39.4891416044	41.5355240467	37.6448142803	51.7043890521	25.883788711	34.6368151219	13.2189114029	23.1848454113	49.0758734992	22.4918300236	163.050167524	47.8755915167	27.9762208913	39.184230229	43.0010667496	26.4724594839	10.3952478422	36.5545606524	8.07771134677	15.1906859963	17.4036680841	26.2863788593	21.2343426934	11.8359883873	23.5638959717	14.1509074031	14.2749420142	9.58455882573	19.6194321705	9.16869085154	11.2462197279	11.7921188053	4.94906934988
ZNF292	4.40466916262	1.90843613209	1.65928750662	3.11096463245	4.32300220942	4.71495227733	1.52177640129	3.37043152749	2.17412726121	2.90307878726	3.59345325507	2.71355578479	4.61761739928	2.2381917703	3.09702900945	2.51104877803	2.03951081411	2.15706570604	1.9076480121	3.07964062817	2.87920243501	2.04783958751	1.03031390587	1.45479253561	5.42632040129	2.22628856699	3.51169964086	1.99843476854	2.09955273799	5.19627660758	3.92669087058	3.0378622311	2.64421463546	7.75185288065	6.16605569174	4.43087162829	4.36678937255	7.44091237593	4.56262089049	3.57474480229	3.85052100695	5.3091707568	4.99755315981	4.29507477435	6.83046867521	4.19723650576	1.12642060079	5.124736435	10.991471107
CDK1	0.273236760582	2.41357249991	2.45493752499	0.205402740407	0.212245765041	0.227950128429	6.52459174211	0.143551640107	9.89089692207	0.793087418486	5.58900672023	2.7716875676	0.167024684069	0.22618428168	0.544827504738	4.34196560004	2.87959663497	6.26657532979	2.15692903741	6.39232431284	2.72710843328	2.49222097275	1.85732604578	3.99586180772	4.61033532263	3.42623578239	0.313886236136	2.0157745232	6.00194469726	3.80381723886	5.74355751603	1.5855448892	11.6280187018	13.5321357306	15.1539936981	11.17017836	26.89843336	24.1893369845	10.7867300775	12.6918242715	3.23581973937	11.31706665	9.44039103953	32.4881709599	11.5506736894	21.8014885186	11.6168912519	15.4749257792	30.5784840531
MET	2.13210465365	8.03950501823	5.73521139839	2.81037579588	2.50643194438	1.40194340182	4.38370855023	1.05245998156	3.54280356732	3.94887097574	9.75481409568	4.83206714681	1.6361634253	0.611837680021	5.31102120896	2.25838635945	7.73206496145	9.86698368999	5.92706653114	3.55392062644	5.45122164432	5.57375728201	6.61592398293	7.10219106664	2.82939867916	3.80131911963	1.65114612102	8.50421527929	10.5819752634	4.57986931005	1.38682823684	6.4211577524	9.30578586799	8.40648742616	22.9787615399	6.9389413261	17.7270022179	29.3800101212	14.1500049963	50.3485323467	3.99903554073	36.7868456854	13.4330204312	8.16254275433	21.0082704382	31.7158253094	14.503770112	9.25374513991	1.12067438085
CYB5A	4.27363057726	5.59959193796	20.284679022	7.29399678555	4.17519939648	4.29770721752	33.5437983047	4.73245934318	9.18249881219	6.08559762059	12.2561757881	9.17627482207	4.0023655925	3.82782910206	7.23940214579	3.18278746704	16.484588514	8.91790294278	17.3857050074	11.5684819845	4.97357785142	14.0533212406	17.9331615831	13.9226079633	2.50884977552	9.63174367567	2.78230674103	8.76865265237	9.3572232663	2.3367342889	4.71996363539	28.2631767895	5.38259977755	5.65197443105	7.49000478681	4.20084201546	10.5062049726	4.90443592544	4.70155937692	4.66150409507	3.79950046661	1.69103927435	11.7612716223	6.29180641216	3.47244287459	4.46527054135	7.35838226701	5.37232918154	3.14332064905
STAT3	26.6488032281	23.5394525254	18.2264831463	25.1729576839	39.2733195696	27.511735837	5.54808941228	21.5823960334	18.6799415817	28.3022233687	26.3260727504	19.40134664	28.9217385294	31.2017347966	16.0745944678	19.4991953116	21.2344505425	29.2881631918	23.9083879815	20.3710588663	33.1258936729	16.4573334644	18.1873005318	26.0967641197	24.6707670466	12.1153620603	26.3300579685	23.5709929365	24.6923420013	31.4267412659	18.6381543445	25.3921062168	39.7664024205	35.384569919	30.2515961605	33.4080152148	23.3606884474	20.5883217942	32.8423420154	35.5276380619	26.6238990854	34.6710763584	24.105860268	25.9463300669	40.0616707616	27.2698774545	31.8194270057	33.867879123	37.2424543787
RANBP2	11.2738181244	4.97201511885	3.445546186	12.5319946488	11.644076	10.669124141	2.41181268876	8.91538450958	4.94206229576	11.8433657188	7.45545474963	4.34363034581	9.46159839888	10.2506664862	9.58796469323	5.26628640611	6.57117748863	7.0906210114	5.85615937272	5.89439792427	6.16908393218	4.9184143908	3.27077247634	5.31468574702	9.3924217042	3.68955907496	7.47394468961	5.79711322194	9.0444523032	15.0490117847	7.42474923708	4.81374129601	7.64386805907	8.54880445334	12.5599705973	13.1969831321	6.02644657279	14.5907839472	12.2068094473	11.8005677417	8.54308211418	12.103256382	6.79845199307	7.79066804163	15.4573952317	12.2650502843	3.09741160534	10.2278578291	28.7364766593
AK3	20.4146038776	18.7722840113	24.2952558409	23.8124337112	24.3146992341	25.2005342234	26.9808583461	26.579172772	25.2110185718	20.3603294328	35.2656479881	17.3087075528	24.8259380684	21.3363779894	24.5318521711	17.031199227	22.6274692582	21.6049271334	32.4972708311	24.7630864559	22.2515944399	18.9089138484	19.763646207	22.0250859682	26.0416353273	17.3351404429	26.8378124335	12.1440199497	31.0140441212	27.0535569978	26.0794689598	31.9253651986	12.3751497611	15.5376895241	13.7450454514	13.8273697564	24.4637921499	8.81855552152	26.0184734453	19.2749079333	23.2444665853	15.8045864566	15.9246085332	8.24648086031	15.3965901071	23.4364434641	11.1245369345	18.2355010361	31.4748263445
LHPP	8.54070169108	13.9743954033	12.2318433805	9.23865035015	9.53360620793	13.345307449	10.6184893601	8.7442236856	9.12825895247	11.1866766166	5.71849499261	11.2717735813	12.8399336532	13.0243712591	5.86123797312	10.5583293673	9.35017438902	12.8331540651	14.8185447238	6.58613405609	8.01818495109	12.0702745124	12.7214630488	13.3281483986	5.48510246813	9.50044148631	7.01250114842	13.2647391367	10.1562498632	6.57308533077	5.09204041646	9.46648116648	6.37698235938	8.42434297128	3.86968844567	5.85431589535	5.05190827235	5.94615689239	3.34024394754	4.75713089799	4.999747257	2.19768565161	4.04712649142	10.4362782706	4.2921482843	3.50798904632	4.73175873487	3.2079605378	5.85615067698
ISG20	0.773348906999	11.9992528694	10.1396723525	2.43731692849	0.748350928213	0.418146316999	10.9471445304	0.353723814871	18.5290992699	1.78578393331	5.74090359361	12.7838759642	0.422471007138	0.828314398331	2.50909751274	1.95920333245	9.61506609218	8.09316159571	9.01795995771	14.8455503057	2.84917101588	11.3378789447	18.1362856577	13.0519060478	1.98214163683	14.0483949979	0.26488349734	9.044482779	9.29073621348	1.28216696192	2.60120903894	6.4641791833	11.9855117806	7.83267858527	3.10097736965	1.6495659438	6.68492977707	2.02680589752	8.60002523049	2.64451550176	1.29679007085	2.29243583136	2.60005913719	1.34589199037	1.9402407311	0.723824603402	12.5382532317	2.15712994468	3.25051090615
NUP107	2.187588768	1.76040616295	1.10395528752	1.68111933411	2.41510127791	2.42189073104	1.24021734311	1.90604795673	2.48100248701	2.28641731214	2.06242212911	1.4974485299	2.18116294878	1.66311202231	1.43777314417	1.4849858382	1.53003509464	2.70778072596	1.27555864804	2.87460184661	1.35069629823	1.48709577758	0.916352116664	1.73120014564	2.36906019707	1.24648681522	2.1456196775	1.60872555434	2.39706358154	2.24988784269	1.75652432913	0.869621583569	5.3201149172	4.40558611196	5.06510127804	5.25387323941	5.65565972973	5.39528730713	4.55583808992	4.68482959092	3.48656546366	4.27219819113	3.8967905264	7.1215916796	15.4028746913	6.61919620194	3.09673840595	8.65046723866	8.90390601787
PCK1	3.17834742312	0.447343615274	101.217538273	7.2191937428	0.170787055956	0.141516434487	3.21497606339	0.258872391492	0.0694048993708	15.3698416744	83.7252748608	0.298722026444	0.487743686807	0.368759634025	0.188959175717	0.109870310089	52.4667761205	0.268886477057	89.8927532583	0.631719612187	0.311712778669	0.408079399079	167.91679394	14.654155114	0.115554544867	0.0329191300303	0.3546003943	0.11439857041	0.0223881447732	0.193860209557	0.0711599715385	192.468495791	0.25278990871	0.490970242559	0.278667512589	0.320517857105	17.5174691752	3.23488806149	8.03575401117	0.00508093818858	0.867279287927	0.023211303271	2.77185632454	0.266684794358	9.2075770854	1.24182665973	0.112917499275	1.40537899495	4.52004238819
ALDOB	56.1170333734	23.6559428053	2655.18100511	394.271822672	0.226938148341	0.398404189617	97.9050733377	0.531307313117	10.1374053295	212.345036936	2077.50751529	19.4821419099	6.32811754093	0.3400896616	25.9089258784	0.0277884961425	1260.26294549	19.6508762431	2358.5265791	20.5136228741	1.02558829061	15.6600453917	1873.31281052	1071.09303426	0.0698886383061	8.8288220302	0.105556180659	6.63345155024	13.4992317033	0.0407052267913	0.0698739788208	4529.63886392	1.80269694477	0.3306449119	12.0896655753	0.556264840503	2.92773065829	1.149950824	0.197214988654	0.353395731415	19.3839467958	2.64765114533	3.96486577056	0.187835873008	12.8944274258	5.05554275399	0.193323774298	0.0496186129694	0.0497442419605
PFKFB2	1.03747056212	2.36900681084	5.24928048742	1.07919985289	0.823333054344	0.695121989304	0.892305257148	0.644213807874	1.26921341218	1.58662757833	8.30121194182	2.24849757723	0.600611598751	0.532708748303	1.89713657163	2.83873509064	4.0628929227	1.69488897517	5.75172321434	1.94501819131	2.10806866137	2.19216801449	5.62955857929	4.69233350177	5.88628882925	2.2454158932	0.991459365783	3.13655368408	3.74968940615	3.56997503208	3.40383649539	5.10930889371	7.65764424866	2.61747677996	12.6797168436	4.86446681394	2.6663298951	4.84440889935	3.44729105393	5.36845441429	2.23240731498	4.76636400933	6.09214340279	0.544047071015	4.58007295654	7.09650345747	8.90253895166	2.5832947667	3.43876573641
ZBTB7A	26.1632444231	34.3477695848	44.0491840273	40.5277320241	26.8639866442	31.5827488466	7.12889047746	31.1247248405	17.1376293415	31.7337275854	36.8308992991	34.5462149101	32.3394085273	23.8128731603	20.0036527713	46.0980076428	31.5592672993	29.2452543751	35.7310380888	19.2811722113	39.2425236617	31.3970649086	39.9450847928	42.8666530443	38.2787823843	26.5684945163	26.6869951245	35.370016605	28.8481244078	41.3233329939	33.5292880947	37.2237141076	43.8146539089	30.397507295	19.1406370843	26.4273079618	18.4184089723	23.5069633174	49.9298774812	17.144928786	23.060919663	24.6629121137	25.4213956789	12.8546127685	13.9265664163	26.3967713847	57.1052385441	30.2328002893	21.6863459307
FAM162A	14.8571409243	8.73415063786	14.6928684009	18.252389058	17.3270518339	16.028219274	29.5858123002	17.4829055003	16.331142854	9.16537617171	12.9411820913	11.8023488551	17.8947234663	17.7458346077	14.0427961258	23.7530672901	15.3539019694	10.7735577407	9.71142477204	16.5858979309	30.6023133438	12.8902223449	11.4169791164	12.2479920888	22.0658423005	15.659433144	14.258384985	7.98842580513	11.5075777799	18.8200288754	47.1762006495	14.088124337	10.3585995085	13.8493420798	12.4828609002	6.53051965008	39.5506205803	5.23289776231	14.0323863186	18.6205487318	11.0971950529	5.01343431739	14.8151003997	11.9192929527	8.896803975	15.1476911221	16.9324014064	16.3778156009	5.36487518398
GYS1	19.1179933254	17.5750203417	12.7160538268	16.6608578595	19.199666844	16.9642956778	3.11344481043	20.201089869	13.5984891839	20.832097105	13.9808773827	16.0769430221	16.9665953815	17.7306497982	13.8527696264	21.3921262258	12.0731486084	16.4653985906	14.3222226355	13.7278643383	22.5185252646	14.2014499856	14.275948926	16.6473851737	20.3652265888	10.7638298415	20.5739978551	15.6647227066	22.448969431	24.8070196294	15.3204622877	15.503807452	20.6721147601	17.7284962803	13.9831390037	19.6485879383	11.8145623372	16.6755598564	18.3444039465	21.1422899819	22.1297361811	19.5943559801	12.9741559781	13.2743104926	14.83505902	32.1118466466	17.1904321937	12.6083419724	18.4291731879
DDIT4	7.74287766706	25.1434720733	15.6507474061	6.48628583068	16.8668325887	8.06623292943	21.8817533238	13.484965136	63.6566241945	19.7678779975	14.6237541821	13.3276222515	6.28132847205	17.8484937397	14.6625716984	68.9766942426	20.5290370688	43.1194314357	51.3631402786	67.1769288822	180.512190515	34.1721340845	31.9466550312	46.0486178905	21.3247351057	40.8157191159	31.6556037883	30.5633589251	54.4287159454	11.3863600532	46.5323181577	10.8435163586	28.8826511761	124.662178969	14.7253497496	114.797944779	30.9939222264	9.25526018876	18.6856570041	12.735856703	7.65772282714	62.7848763115	25.6286813823	14.4849250131	7.19991201168	50.2466000913	45.5589948727	19.4300701961	24.8644998143
PRKAG1	8.30305037384	7.78835590117	7.16498232787	8.3095767636	9.06872653893	8.58077503424	13.7192827397	9.77850740678	11.5305515755	9.03263206218	6.94305179269	7.8398384228	7.48673380021	9.88281820325	5.62193621379	9.40319160328	8.8716665348	10.5902510182	9.61330764747	10.1247245494	8.29229287847	8.10665734812	6.64638524132	8.62561742145	7.7402004402	6.46426511307	10.9990616696	9.37210856348	10.3297589288	7.72187689727	8.62695950825	7.36954243246	9.51969900554	9.41876859692	8.47418688989	8.32887942813	21.3796667369	13.4440508527	10.9632660616	13.958388298	8.35401783266	8.04987822971	9.51045307698	10.7113447811	12.3092882305	9.70268045604	12.3849952385	14.3236890387	8.91141453821
LDHA	51.831720621	63.565199802	228.848196639	128.631850784	54.9031866549	52.2847385524	80.6385969225	54.1001546922	97.9197617137	80.4574381312	166.61075745	46.5021293404	66.6765567921	74.7340240525	32.6291973491	124.047221204	152.683949935	79.7217289368	122.43485042	68.2470965099	131.930254005	45.6653392829	195.889761181	104.49514364	111.217116881	60.8578151479	95.877637959	37.255466598	58.8109081916	73.8001812761	74.7739112763	206.285314252	186.345795809	133.6094035	110.156885596	105.405758341	313.151928217	95.9695071129	99.0142515645	249.156528514	69.9192074747	150.518729181	124.288397501	79.3998568757	199.676290314	200.82966546	192.777471198	119.64900974	149.820171736
ADORA2B	1.37273216516	1.09027047627	0.25544178202	1.41922719721	1.00163090495	1.63472403789	0.452308109848	1.30455974399	1.07033141334	0.613203779482	0.356233137993	0.501386674215	1.19828948721	0.457461256297	0.293504627895	3.76458415147	0.388455380505	0.539064157307	0.385202896166	0.897084876073	6.78176671971	0.369618235322	0.513344821248	1.90859174299	2.55613790594	0.475173640711	0.635815010757	0.756441045334	0.90311642595	2.410127198	3.31198824896	0.239201074122	1.91067059266	2.21336884027	0.290975623582	3.26387227059	0.604266061126	0.918788619946	4.58446251246	0.909973921219	1.0620134772	3.25295295183	0.795220973445	2.12957724498	1.2621790981	13.5681204073	5.99028985044	5.52059683298	1.08015009691
VCAN	5.63603479838	4.13023051051	5.80388930836	3.92074517019	3.72346794896	5.07828174875	1.31591567668	3.4380489867	2.10612585675	5.71771591021	4.0080230096	3.49754383208	4.11714551116	4.0551100213	4.26297485031	0.093684574373	3.56952199785	2.94190459406	8.02462856957	2.00290971017	4.93267851684	4.41620821407	3.07106529034	3.37666145832	1.70939004573	2.52158493985	8.6316333965	4.63140961417	4.61622312708	0.678588667896	0.205930596539	1.44590652071	23.3163638952	26.2304427748	11.6447668937	17.9360600507	3.17454428155	10.8174542704	5.97884588814	35.1012918222	10.3944361025	42.9529052833	4.07642089543	4.9108638429	41.8803904058	5.43217488509	11.7878734702	2.52070114944	3.24969429398
DLAT	7.60502798281	5.46000838391	8.68405875725	6.31615586921	7.45869939895	8.71060185721	6.75577140693	7.26907808997	9.4913633918	6.3378959506	9.06792196656	6.57968290726	8.00746230755	5.26259008439	6.64631369989	10.8388871021	8.63489339697	9.69221680676	9.3682820596	7.77431687219	10.0584486997	6.48365744169	7.37089555305	7.30675370289	10.4033440696	7.93633275578	7.2730121168	7.37684017921	10.6150860028	13.0441493843	11.2732429775	8.57101225834	9.90059736665	9.43537142252	9.64711500285	10.6187991621	28.2772225024	16.4863815081	18.168629841	14.2395890524	6.37390386898	6.71406732009	15.1999122573	12.8676428241	15.0995841073	12.51203594	5.00220764046	21.1410602529	19.7535167388
GNE	7.64828455871	4.5047736038	2.1132417882	6.16325084729	6.82015923409	7.27418982747	1.35430526279	6.7287253153	4.52327357755	6.69684206097	2.89630197529	3.99593777031	7.06693033144	6.41746148825	4.68928075969	6.05860856142	5.54617836483	3.01913207418	3.93686422533	4.08819518311	11.7574424607	3.32974087566	1.40838859082	2.35467779077	6.53453791611	1.80334564502	7.309049829	3.26837165283	3.16747637244	5.84502846887	6.67596303928	1.599553848	4.8330900625	5.37044404305	8.98631258175	5.38911078789	1.26408318505	0.950677804638	9.96548726332	3.77023239633	4.34929792929	34.9136911716	6.96415967943	10.4484107331	3.02786749078	6.49255897021	4.60325985118	10.8181368218	4.57684808773
AC074143.1	0.0146476977689	0.0	0.0	0.0	0.0259562625179	0.0	0.0	0.0	0.0	0.0	0.0	0.0	0.0	0.0	0.0	0.0	0.0	0.0	0.0	0.0	0.0	0.0	0.0	0.0	0.0	0.0	0.0	0.0	0.0	0.0	0.0	0.0	0.0	0.0	0.00985271366529	0.00518052399345	0.00661455657272	0.0147679100345	0.0	0.0	0.0	0.0	0.0	0.0	0.0	0.0	0.0	0.0	0.00606884704058
PDK3	9.22671798553	3.97825074157	7.3689278381	6.10326418048	5.89506049452	10.7165448575	2.87465600034	5.33134852557	4.05931892814	7.2778108508	9.24321384959	2.77726805656	11.7539911758	4.52091471879	3.72152268298	4.19524833823	4.53967241173	4.27107128916	8.28209708513	3.64635680185	2.55130057543	2.32108008669	3.7675102736	6.0865596024	3.95773523869	1.4992800958	7.81656096543	5.85005759249	2.58518161992	5.19666223108	2.98674313106	11.6929764824	5.26399446163	7.55223188253	6.10715978037	3.6417199847	5.0787768012	6.09887833679	2.80996599233	3.78609172767	6.17871838402	4.19501396779	3.43010725824	3.85647782413	3.96699409803	8.77816310725	2.86441093359	7.66243577807	18.7340894436
GNPDA2	3.94901009967	1.23284799695	0.781177205914	2.98531731286	4.40993390941	3.77580974342	2.14860540464	4.3266150301	2.73932588208	2.20157759192	1.08967848317	1.16607398831	4.34153275568	3.01363913441	2.05538584505	1.04974522599	1.3432991838	1.55050451599	1.05235122324	2.13376551875	1.47865700017	1.12253366976	0.684941355395	0.9606308326	1.64988209996	1.17417978785	4.6830916565	1.04508841366	1.78383869946	2.18548853347	1.90822415755	0.873749031756	1.1056763614	0.981077240735	2.43066032722	2.43379423205	3.82304070294	2.93575207915	1.26571108651	3.05280531888	3.58576904509	1.69188140255	1.26400475292	1.40530327867	2.2734819977	1.08288238158	0.803534044897	1.2212549404	0.26089846109
HIF1A	22.206100343	17.896713977	13.9036028467	19.4526252325	20.9286421364	22.2290647423	12.5953526961	18.2333578181	30.6807310043	18.5205543093	24.7094853093	21.566058492	26.9766837158	12.8920457373	18.7881469817	29.5154840128	26.6335391005	26.5320145329	20.4232146195	34.6883404788	70.1615713558	20.9437224644	13.2095516225	22.7865035711	50.0844070764	15.3223845007	25.8223658086	19.5919658655	29.7941601335	55.1356119671	58.8270262119	11.5021748512	35.2573343325	75.3872198568	80.1755268853	54.7822228678	42.1077945819	23.8858917748	27.0287557688	65.2244533245	22.5647704353	109.109324426	44.3870244517	33.358078454	32.6926137493	31.0483458196	26.3702485532	31.9915790382	107.10584258
CACNA1H	51.1039623824	20.3807617034	3.86230314287	48.2014837338	54.9038201012	72.2826935499	0.435205276086	41.579535848	7.32273132261	48.2122366147	2.27301098024	2.04361888421	66.3813139731	56.0553546366	23.6761751457	3.61260276054	4.33965014097	11.8824345122	4.44764962091	2.95919271062	3.72322137743	2.35016540337	1.83533712234	2.39459226681	3.65315260453	1.61398024614	48.4903097811	20.5962733102	2.36544985015	22.0066356696	1.4096811676	0.770612674385	2.12053946556	12.0984396984	2.50809280824	1.04641028	0.94762254992	30.9171679707	2.20144175518	2.59525177703	39.3476964197	5.21836201211	4.7922213069	0.881809055522	4.86370795124	1.51113363734	3.08574617362	0.782672210418	0.776031282466
ALDH1A3	2.35795070655	1.51940468184	1.70418225539	1.54328937813	1.76169362833	3.01930885511	0.673957442879	2.57448708037	2.28007664567	3.17065407848	1.2479532178	1.66605447372	2.57899039951	1.16975642077	1.67426275885	6.24456037089	1.63098092842	2.16479804944	2.57312750775	2.98134931136	12.6007347879	2.35074586228	0.854679239707	1.6920679365	4.42982329084	1.69562264011	4.25473449161	1.73560619138	2.93586075401	2.36803291555	4.52483040864	0.641856807583	2.57108637065	2.50885461806	10.3394346478	1.09269744593	1.59086159231	5.09128175889	1.11892115091	7.79135463016	4.93981981184	1.95673199594	1.09435653194	1.37190479306	4.09981041989	1.02080406408	1.61106075919	1.0324230421	0.823804980035
CLDN3	2.5985579215	1.91902262598	180.773439471	15.8752149941	0.191011470324	0.117225530462	10.8422991044	0.181717666066	1.24304627359	26.3000644597	142.61906678	1.67325667965	0.329495165478	0.490714144769	1.01139138086	0.0641534731981	199.392573008	2.89171975471	151.441771374	7.36123488537	14.8852245111	2.70770796313	346.14832686	146.01993985	0.950156335099	1.40957957725	0.0468635790595	1.93361278598	0.969542141398	1.48791342735	0.336069705828	352.17642808	84.8527856707	5.75632054513	134.876450018	8.8718465897	134.586636991	103.037128302	167.553611841	7.36994870067	41.8822237837	256.620298678	212.426199249	99.8195029959	47.7861735634	0.464810793202	170.126173283	0.324561812653	0.440224827636
SDC3	44.2074617628	21.4902143747	6.86728002048	41.8835724094	37.8287581203	45.8093553058	2.35110613137	39.1818882023	12.636590846	30.3745293034	5.68068489	12.8635063439	50.550566725	41.5187541707	16.9565124645	2.79107702441	8.30276706301	16.8186402977	12.6732367992	12.1433963432	9.60907354362	11.4059883093	4.35844919018	12.3067993985	2.9296878087	7.8266272743	29.2001720162	23.8429477785	14.5797132944	8.42815918873	1.84177802162	2.21825080135	22.6003414569	19.417732161	11.4137490655	12.5666720211	8.28683384594	8.14662133984	9.01913463142	10.5602745595	35.222255156	9.47062839221	9.13415279173	18.2896974984	14.1748803732	2.03618303355	18.541892602	12.0290135915	81.4316126862
P2RX7	1.87302747217	1.04342891146	0.341297470008	1.19758927677	1.94317835479	1.87877903005	0.19616018552	1.36187495525	0.82053595247	1.57004625245	0.600005655957	1.83644563498	1.27896723025	1.37774332347	1.0015387899	0.584568545359	0.591012733415	0.701005641595	0.531546657836	1.56153334019	0.783186970428	0.854215300727	0.391383298143	0.465076460873	1.20045896863	0.655698498442	1.25953684952	0.895763148846	0.633121071366	1.19628668816	0.705095976869	0.212192215526	2.32931863629	2.20625184129	2.25208766796	1.31174958876	1.76111674245	0.534957289205	0.92725596999	2.64880869516	2.04929845029	1.45753286871	0.468722413626	1.20575237142	1.17240506914	0.504507445239	1.42395892176	1.75866222054	0.692495278926
NUP210	1.77491266775	10.2882643486	3.21981792819	1.50573743942	1.6188117056	1.99518368628	0.58423196666	0.937266274149	10.8233285207	5.30239990327	3.37121212468	16.1360404968	1.18132862962	1.3057269125	3.56674035589	2.02281028881	4.24595561256	6.09203615478	8.66087625244	13.4116437694	3.44498888606	8.67956195733	2.02585930097	8.63197694135	2.94078782362	3.76960892823	1.57493967733	7.91835941452	10.2215266215	6.77662550887	2.34432237522	1.90352946587	6.27919850242	6.94472567604	19.2691298542	1.00744033007	2.04965398718	36.304490023	2.13992644456	2.23794865594	6.32755830463	1.35550683855	7.16340747487	16.0321929384	11.7331482774	16.32589966	15.6941714359	22.4264292986	45.3300150198
EFNA3	0.354544877322	0.763713475318	1.08906041701	0.184193976398	0.154790332421	0.16850018627	0.673496692969	0.12127203068	0.820030478253	0.573024664713	0.826060662591	1.04222825697	0.208616984464	0.174658933595	0.383089561586	16.2478332542	0.63888442643	0.916003624966	1.19127231367	0.834442166822	21.6105449475	1.0601241668	0.638998395863	0.910876587661	10.2832070273	0.682010569159	1.13632927705	1.26891861944	0.981463045532	9.62277478424	10.1225580282	0.707784933871	26.2277167272	2.83246010167	0.79321570673	49.7867297655	1.55927516534	12.4098909956	11.2818199647	1.96011895802	0.796120005974	3.92052512823	9.7357029764	14.4578963846	2.05509553289	12.6948739135	3.31983453877	4.85441581643	6.9551752877
MED24	7.10953636074	15.0744699911	9.99274231859	5.56881003708	7.93951440425	6.50640421259	3.267321426	5.16047045757	12.147381129	11.8912182057	11.4156273154	12.9486428095	5.87184805954	7.29354813014	6.85038483821	8.73430831538	9.6706991916	21.2105182679	13.0902051998	10.5283166266	10.7973607076	14.2107296787	9.27867335212	17.3128720313	8.81007822383	10.2726098089	7.01065545426	18.5647194916	19.4125176304	9.47958488043	7.0067331622	10.772295915	17.317601211	11.2721892645	16.3936786428	22.5539439913	10.0953230298	11.0607859787	12.0345900287	10.0775650608	6.45403808348	12.3724621917	15.4869211736	20.4584650376	45.3145259137	155.150901818	11.2242958635	11.0155929297	20.5230859384
HKDC1	1.15387333754	1.24814123495	27.4309241722	3.58374879085	0.085706250244	0.0296710781494	0.626980693296	0.0441654142022	0.363286079694	2.67119100337	34.9961222175	1.13451962645	0.0555992468319	0.0554532203564	0.163534469989	0.00959515436187	13.2265033381	1.14403721658	21.6616670886	0.500448955365	0.143213433334	0.458977373917	28.8564638938	17.8078012565	0.069714696168	0.158118488619	0.0303731156133	0.318122206888	0.348676156061	0.0878450142629	0.0134038602246	38.8271250911	9.53225143233	16.2924991119	14.1286849802	16.927435739	6.2153038638	5.21066235782	0.220684143405	9.12745748859	2.76165225834	4.60292219378	23.5160748122	6.55338919053	10.4152325963	16.9628109805	10.9864666276	10.856564168	0.423682185553
ALDH1B1	38.2957035299	17.4404274882	11.982919755	63.0813727057	17.6031461179	38.5709464569	8.9782380036	47.1360275197	16.1604496962	39.0715708876	10.9405066234	6.78284435264	59.0272785182	35.8644569743	20.7914383515	3.55876013309	17.6395904182	14.2473315769	15.3656792737	11.6643351146	12.1834874321	8.98596367501	9.80030167517	13.0348588642	5.89613468338	7.24823196999	39.017389055	19.8455774386	12.0724934119	13.0120460804	4.75725339138	6.87100311499	11.7678999169	22.4456883939	8.06677434477	18.3339335512	26.7116483773	12.0668323158	29.2802615067	9.30019997033	157.112958909	42.4087658054	14.3819007637	20.5679499825	14.6106069512	16.0644659038	13.6579605169	12.4391823593	11.2061122046
ESRRB	0.0551288968189	0.168078828107	0.0244765092236	0.0436589109902	0.113115252491	0.0634326278029	0.253540758603	0.0798934207247	0.606639332925	0.0453007016045	0.0553428533512	1.08363708734	0.0360835433962	0.0109585191689	1.40095281766	0.0107449582402	0.131529354885	0.13726383935	0.132876931092	1.46446233048	0.0145795405262	0.539676294561	0.0884388693568	0.440059430257	0.0247718080243	1.45194201613	0.115774264891	0.267182504267	1.78169552795	0.0147557450501	0.0281438772908	0.00859511987048	0.0468866070759	0.0157192912265	0.0234203530904	0.0533621554474	0.112682251755	0.0906853351447	0.0185346828389	0.00683236393373	0.117275023558	0.0245239970568	0.00958182410139	0.00907879559735	0.0678099294326	0.052549009612	0.0661869922409	0.0335754897541	0.0144259282641
ME1	5.0849476287	19.2358935239	8.01756522366	12.6909522243	9.21954740833	6.41029956522	24.8204501768	6.93632125881	10.7942261553	7.56744089609	10.6840492037	11.6918720868	6.84892502078	6.59808749476	6.01761126855	23.8656375848	10.4469970143	27.407263861	12.6595070046	10.4891738232	16.2845271822	12.1911813344	10.9783547188	14.4346467834	49.9070142837	16.274643682	11.6598234402	19.0852534075	31.7178421548	27.79815302	41.930439859	25.8636114933	1.10499488487	5.8998146513	11.7173331502	2.30012345405	11.4674179311	1.66342041175	12.2560203429	6.42370911968	6.31180755849	5.15474630157	14.3202606713	14.2854781394	8.76792847713	0.522605347924	5.52879613913	2.04195238029	0.264028152011
RAE1	2.74419551674	3.28304584877	3.52964013364	3.14736512532	3.52687754633	3.27867095089	3.7161550432	3.38563599487	5.15771045533	3.62268150417	4.3892290738	3.68941428409	3.20055827746	4.0645826071	2.31668781676	5.46970722837	3.57374612062	4.58427715854	3.53884401626	4.71709882909	4.80153137757	3.75500901502	3.96464367154	4.91019783262	4.61863273888	3.12080436906	3.36165405778	3.4220047606	4.06758367831	4.55603852992	5.93295717572	4.12657405702	7.2621295004	7.98032887199	7.30742116829	6.14683726839	10.4425365936	19.3999551881	5.74462336401	8.97091835047	5.87422347362	7.26027592458	26.0001168654	16.416230518	28.5481192696	14.6954993191	7.53984181839	10.4437459968	8.40030631666
STC2	0.962819610959	0.358699147393	0.116464127786	0.954212655473	1.46079513002	0.554908320439	0.0914548946279	0.776825971576	0.5109132451	0.667624229384	0.202814991833	0.13141642431	1.44204319104	1.02471989715	0.338131134197	0.217844033827	0.177257392025	0.512529500448	0.178680767142	0.28923587325	0.434331364279	0.19514821273	0.289809903031	0.18444210408	0.257169204127	0.102567156249	0.482271195533	0.234496829109	0.428044734904	0.303229196291	0.0512367369176	0.0782383129072	1.35150823425	4.26876532092	1.56175721244	1.24321416751	0.260221491278	6.7248478654	6.39581757082	0.421213341113	0.760198468498	6.57523258165	1.79593764672	1.41241051324	0.872311446981	0.347879931779	1.44336640367	0.269903230626	0.288493062525
GPI	23.3525310203	27.7121715346	45.2544915186	21.2055711114	24.2761072643	26.2491531315	7.30464974985	22.3200227525	23.7443063108	25.5036198204	40.5055353634	27.9073293459	23.9237645402	35.7455527268	15.0007475453	31.9020840722	32.991640638	28.9387365965	34.6941808046	20.0130742065	30.5991286868	24.4562608043	35.6022602796	42.237536636	29.8654430845	25.6993954495	34.8580270544	26.5663231203	36.4709639561	29.4476964413	22.7608888115	40.7860007404	54.5567035288	31.520798498	28.5756707108	45.3302575239	81.0793964463	33.9389837885	62.3579963969	38.291459917	21.8966639286	39.7382089921	23.7121431007	22.996549892	29.4884300406	71.1876501778	68.858493471	51.1953097415	70.6624326971
EIF6	27.6835224309	64.480184096	148.724570545	32.0209928121	27.9896563564	22.7937417521	73.9890176932	28.4170435865	65.8835734269	42.1457120568	82.1921592599	70.0013910932	24.9723922972	32.7415348841	24.3262094482	88.4800757256	112.140151141	64.030050118	83.6270882218	58.2484096636	83.7785197102	68.0932920933	210.631869727	113.038514013	62.589173485	61.9810308795	28.2108726236	64.6830290756	57.2185516687	59.7727349001	88.4029616163	102.685464799	74.7514771004	83.884001911	64.0436529858	64.2198545946	88.3934307876	104.284593565	65.0436998902	96.6600319235	58.9333062455	77.1775580561	147.482425414	114.597234691	166.499224891	164.347683845	147.814625631	139.29660246	37.8133027965
GALM	5.690318204	13.3130987834	37.1360164026	10.9740267293	3.84398603021	4.49230081217	9.27560492325	3.49025739966	9.59070654742	10.8880704081	41.7301096536	11.1213261765	3.97362509001	4.39187400736	5.19249491033	1.63072456997	28.2299077029	16.8189829942	36.8507299303	12.5689383652	3.5575215461	14.3012917673	33.492451547	25.2831154709	1.82143819253	11.6984747786	5.13227857823	16.0990706221	15.4952989552	2.60149074031	1.59598178292	88.3537832174	17.6830149749	19.5662346805	22.004088383	9.84812040699	25.8295043908	15.4298670456	9.33637433445	20.3348843797	8.33671759661	8.17728509462	20.7288778061	39.5824464955	29.786994086	11.9707271722	10.9330570773	38.5768709833	7.80919877777
INSR	10.2309655894	11.95634219	8.89246323145	9.44309461279	10.8822804114	10.451523651	2.18601015853	11.4704712463	2.94874068331	9.91955699258	12.6095321557	8.33572470291	9.72227753284	7.19557775017	8.81196321963	2.45822817395	7.76054153752	8.8305447627	12.2876906873	4.16688494966	6.87615828229	9.15189573651	8.03656284555	8.33853580419	3.16555073555	7.38443146983	5.89748689243	16.4055324063	7.42335230187	5.08937779688	1.32735153471	11.8497690749	8.79673083913	12.2214177772	10.6470713815	9.76435086129	4.76438136516	43.0808373577	18.154980136	8.7686438435	11.127854796	17.966011327	9.23808223578	7.74981902451	9.09754454791	17.9687664759	4.34875365194	8.38541075607	8.89662083157
SOD1	52.1936067718	57.146240724	148.972118202	76.6427037187	56.5626685303	51.2213442653	107.162509258	68.3545761532	82.8275601961	47.2182966826	76.497044581	59.2674864227	53.1351617638	64.7911400497	32.5047458724	41.1423838998	131.849125799	51.2847461804	86.7860298939	85.0764633065	39.319166764	69.8011260462	136.172460837	112.565352721	35.1530850657	77.337885569	50.8624187823	50.0452636492	49.9602625029	38.5064943497	47.0494481026	129.642186756	106.476701817	60.6562706715	34.3382077226	78.5601446217	109.665868699	22.8209706021	41.2787137217	52.3221651717	47.4884203464	36.3973042005	111.684694085	72.5865704945	38.3980862416	67.5978894876	116.298050532	73.3184974028	83.6009860948
RARS	8.20194646703	11.8475378187	15.1749044761	11.2073341126	8.37346044477	8.84862576185	9.72332676425	10.7515002064	13.7811087943	10.4146319925	22.0089655635	10.9809419262	7.73676351625	7.68746286066	8.14882918445	13.0525157592	14.8844103916	14.6894160947	18.0223417005	13.9166955741	11.1191029902	10.8970747947	16.979330185	15.1047133032	15.3321126781	11.2467433124	9.22352223121	10.7413198234	16.4790797987	17.2866953568	17.6300667921	23.0139078891	22.6109029382	12.2718299502	15.9174434154	23.1183586287	32.2369067053	13.321008832	19.0082495195	20.6352219884	12.4680863783	18.7809156683	13.8553022458	11.2606768541	27.4453504023	25.6012241405	17.3770086073	27.9846540454	22.8735075579
NCOR1	14.2732738396	15.2161859105	12.1288106593	15.0987576785	15.0845989036	14.4928775565	4.21822657341	12.7230752259	7.57818496818	11.8316904435	24.7438401346	12.6517400193	14.0902462815	8.19364063974	15.057756673	7.7058827532	12.9750017458	14.7541994305	16.1630803714	10.5100997144	7.60254702761	14.3935713191	11.8552591437	13.6457806226	10.0090085071	13.6165899603	10.3647741337	17.16485125	16.0427557332	14.0125404608	10.3767666808	20.6422568979	14.5990139134	19.8944952918	18.9916208041	13.3534954102	11.6806181416	14.9865228466	25.2781459696	12.5056388824	10.3809831472	15.9176215662	10.3730421069	14.2406055697	17.8553902334	41.2229011871	5.12292470978	22.9256217192	26.3127289531
FKBP4	8.00443238768	17.3721747723	13.1368720827	9.42798962205	8.91584756278	10.1175137562	13.3712830296	9.24301383248	16.4984562026	16.2987485088	10.665385926	16.9642098383	8.92456950459	12.7715945299	14.8979649597	33.0134351037	19.7741108803	24.9905597808	20.4877373585	17.8274582551	15.514480301	17.2791773823	13.5546355558	12.6274604472	15.6856953469	18.4433963496	13.2682402664	19.5377636075	22.1120087355	21.3717439902	20.9392620316	9.4211634342	42.0214472574	31.4797793368	19.3565680372	31.4902421374	43.2727508879	33.6178799472	64.7686860178	28.9248252438	11.2830031001	29.2133119651	11.2937594096	28.2919470711	17.2927821691	31.70047297	55.1322876182	28.6852270792	32.8957097171
MLXIPL	1.09702738417	0.181673398677	8.33913652571	0.343498636359	0.545106669516	0.169398803937	0.1574738094	0.246413306576	0.136095473418	1.98334011661	6.03946490563	0.0688685961421	0.342018034696	0.118296816143	0.148267007347	0.144282027261	4.00131848431	0.398426345596	4.29737402429	0.391405403018	0.226481731594	0.0668669840503	8.12561343879	3.68959248108	0.649849669529	0.0466200514385	0.419520683403	0.545721883412	0.221942536752	0.16576284256	0.711364993104	5.79334285201	2.42370731845	4.09461364838	0.386426908585	18.5630515414	7.12315484174	4.2669982133	1.09312670693	0.510889126285	8.54278928529	0.218362892174	5.49973818482	1.80951190877	3.50259058032	5.75873543281	0.13531158564	5.77893300619	4.17551927285
B3GAT3	5.01765694998	10.060098261	7.73196343237	4.27491246953	4.45289589921	4.93969459335	7.38630107782	4.18941359961	11.2080479846	8.20428063702	4.227157213	10.6332812592	3.98533540211	6.56296708804	3.7865369281	4.90905300986	7.99785926615	9.78216374164	7.86307083927	12.6871968028	4.18688915822	11.4229589613	8.75520766412	10.0383314409	2.93961169152	7.28528548473	5.71304601951	9.46949962953	9.95739143856	2.83526657732	3.16235872063	5.61876933533	12.9424254321	10.0078397657	9.34676180414	9.58894721427	9.56694809811	12.9647956615	8.65458781467	5.6080060052	4.77622819894	8.13460376346	9.35566661182	8.74600146363	4.62210688269	6.07899962611	16.1490841162	8.44494487538	8.4864127515
ADH6	0.501486448837	0.688026910987	16.6748860836	2.37619328653	0.0947896049052	0.0939722043788	1.46818739697	0.0624667380255	0.2357550251	2.13262827738	19.0484561021	0.150694065178	0.127176199597	0.0347237649261	0.0474773897534	0.0557133775422	10.6476904395	0.235312155718	20.2546302287	0.759589095862	0.302383844615	0.24037342645	14.1603904713	6.87485191132	0.0960083457103	0.0816089243996	0.108528424852	0.158593447394	0.0977589294883	0.25503198074	0.0389141381708	27.403329896	0.28813086054	0.443752983944	1.43924393573	2.60132696504	0.896779666874	1.51006494026	0.00915272925077	0.244047817029	2.34223172855	0.315970053423	0.400219686016	0.541353357314	0.255708609149	1.04278785882	1.42208392927	22.477123441	0.0360145599088
CBFA2T3	1.67536109143	3.21497049016	1.9588656484	0.78505537161	2.00539654686	1.55624154489	0.298092294345	1.59423628728	4.20931426249	2.54792461846	1.44783924382	6.18720185942	0.939013404721	1.00496153318	1.31204784183	0.816585339861	2.32305684182	1.73410716229	2.48695444988	6.3340515425	1.58772404782	3.73150449512	1.11742896464	3.36300608465	0.762977494338	1.64635448564	0.971409590249	2.31684931432	2.65394804567	0.847831869797	0.353687291657	0.654420318163	0.746489820669	0.638465475201	1.79976511256	0.137676849217	0.369376244083	9.04170979436	0.458660244042	0.510537297505	2.26271649722	0.800779135645	0.341720706759	0.364253608407	0.976232484572	0.292514803096	0.836407766896	0.395066188133	0.0959542438233
PKM	42.5357470852	79.8110253459	68.9099078301	46.201882026	47.7595533167	39.5629805507	25.7011031795	40.3893670127	84.8889164002	57.8948513603	51.2777104439	74.183141525	44.4266303416	82.2278354417	29.9509999859	117.703821622	60.0361306517	72.452663649	67.6098785565	60.3395542348	103.14025056	50.969533291	58.3439387116	74.0976406403	100.996843408	71.169041332	116.6754689	64.1986366478	76.1599291968	108.545253042	81.9173391118	47.4048909568	234.301383903	105.100684722	245.247327222	348.112426841	134.139180372	123.472598765	101.073396899	157.047027026	43.9478956722	130.146534747	281.632749256	95.2033203281	56.0906947949	237.223392851	197.786641561	131.964787737	275.856965409
GPC3	5.89955613738	2.74682879491	2.12895521567	10.0928570609	14.9840783325	6.6826768096	6.84629590947	3.74140821894	2.1083252102	10.9511460218	1.39013011953	8.64958285082	1.91765943228	29.3893103832	7.73310533429	0.170839287167	1.84170484228	2.82431361962	1.09776228425	1.9034529236	2.18853235455	2.08682283653	3.39456892422	1.43248307133	2.19044552549	3.92480300991	5.89113737572	1.71134122646	2.1347776597	0.575021387781	0.673841867315	0.728842492241	1.03050657236	43.9090268816	212.383191371	0.422295830805	0.696048495002	13.9533870733	0.866740839876	2.41544352969	9.51805369739	1.88912573861	20.1141600287	214.22540838	50.5228122014	0.120137559128	0.495218351389	0.439627133826	0.16190457151
TPBG	2.03526938738	2.38786396497	1.4022870083	1.42417630795	2.68132628135	1.64733791504	1.79541087391	1.4209392368	1.99059835241	2.6951489694	1.14011950218	1.45463676481	1.34232054233	2.04043452402	1.77805540961	5.67053887678	1.63958493222	4.1115103364	1.51684081844	1.69959219487	7.84679835511	1.66551754781	1.4784555342	1.69587875618	4.62813009716	0.825851522449	16.1943894379	2.9496370556	2.62334760833	10.213122111	4.77103454257	0.63552180208	2.89568658679	5.61513012536	2.66922200645	10.3202386042	3.31446194006	3.63338822128	8.03600613363	2.09015659647	1.29686611344	6.18170610922	9.68234477803	2.52231895109	3.0563086314	0.542507041159	6.17117685278	0.341734541647	0.236641082909
COG2	2.02988125114	2.8483106388	1.56597295682	1.65498655151	2.15487761859	1.91783454244	3.03506740365	1.93928950351	2.92895176837	2.64725188593	2.65862347053	2.86707828881	1.68272078475	1.47080850057	2.32419141803	1.3063992438	2.77540338084	3.88032396202	3.19568077791	3.44394810695	1.50224683803	2.71857048145	1.55805387158	2.60718228706	1.57129313095	2.19180732235	2.02416414306	3.18681944178	3.67837843835	1.82653540874	1.50311462065	2.39752740958	4.14094514937	2.71222755734	3.83015326032	3.98399393004	5.75744054202	6.4203590136	3.36719771469	3.72189870834	2.57352451739	3.84604119541	4.61772833277	4.91195959749	6.76765165892	4.60043486671	2.20933124073	3.7402962277	3.88798593906
HK1	23.5495327868	31.5374632717	3.65330439919	23.6617731466	29.4289765102	25.507256244	5.96040606464	23.4729523744	15.6700278791	23.7928191305	4.5771581272	22.2701074819	29.3643689753	32.8203575527	17.2661069441	57.0806258438	9.13455048788	32.3749179565	7.39225841971	14.6740427687	38.6099182944	19.8846855824	8.61352705403	16.000902903	56.8620843097	22.4734287811	31.1055636291	30.6525014366	37.5817248504	62.5442436899	39.1797769839	3.44256228498	18.296410464	18.9819854671	16.5787417371	21.9532829447	10.6431689722	14.3214038674	13.7940702661	20.8064067432	14.7595510312	17.7020574962	13.2614820114	7.61876590425	7.38914405663	9.53632856294	14.9967623163	6.16787220147	9.2872786427
GLCE	2.29026365097	6.45149239934	5.82223795519	2.66946060546	1.86404723099	2.16593174685	8.64694790571	1.4381973419	4.4120438459	4.41521467766	7.44190336636	3.45820962218	1.77443665938	1.4898466309	3.07801718177	6.00145259175	5.11341070024	10.3860477262	7.00412575199	3.92205544962	4.73092181238	4.81108382478	3.08722938719	4.18323851029	6.78470678483	3.40606939612	3.12478994019	6.37839459532	9.53291256595	6.83369155307	6.44489441348	8.29424097975	5.80060346757	3.53676742218	3.91254454722	4.56650375453	11.3785268274	13.6686485115	3.19981071209	9.0327597153	3.63777610573	5.68859079604	5.1740780683	3.32442934721	10.0052067855	9.45862622354	2.39419685098	9.78424714253	46.7555921474
B4GALT1	16.9111974493	39.7748062433	22.8879395765	14.5484594804	12.3245464606	12.5687008458	16.4733100135	8.04799586444	29.9504455844	27.9044865739	25.7326856655	31.5489514077	12.762038213	12.9260440327	18.9187250735	29.7453165678	25.2547287974	48.5032976878	31.2207806293	28.3504658359	67.3066503826	35.17425166	30.204475623	42.5757210164	46.7603788252	25.0078859481	15.8711735437	48.5882187246	59.6686973211	31.4562928821	39.8945346635	21.3675323021	54.5528160681	44.4591286066	23.3603518757	31.7624077977	30.1265303411	17.5494086759	21.1939784291	40.252917423	16.1520907313	47.2822112829	31.4552365007	124.619304649	98.7722047108	18.8579410233	42.2297215853	29.4447297516	25.2627924239
BPNT1	4.79267683347	9.46038107694	23.1155763905	8.2791215996	4.75730848608	4.61664490319	10.9395130268	4.02518056313	12.8875374659	8.1348793981	24.4827452326	8.1869593983	3.350414381	4.31105433516	4.17828863507	5.64918077883	17.8936093181	10.7164102243	15.7289350069	8.60535969187	5.42087151122	8.74686800494	16.4925303646	13.657311363	4.70291939801	6.31675489125	4.57099291156	8.63872931533	11.8634735348	4.80734874071	6.53759396349	31.7268045577	12.0803149841	5.06151919961	8.2597295785	7.7196647192	21.1132778633	14.9058450657	8.6911382682	10.584394009	5.9646344039	7.88810859654	14.0437968708	14.766949764	9.73058328523	8.49352510169	19.1089729607	7.7039901897	7.42975236026
PLOD2	6.47545196912	4.18612993781	4.42359443884	9.98286080271	11.8487068118	8.64838020238	2.85861733938	9.92183863572	4.06622160932	5.12043253987	6.1646301842	3.81650556596	8.73074564465	5.52908351087	6.79550101402	2.75787776778	5.43836946495	3.24622766791	4.85432802023	3.42436763874	5.22393698889	2.54157193613	3.35270018729	2.44477918033	4.03412101117	3.24705670586	9.94289140017	2.19085460208	4.51608590244	4.89643391346	2.50866409548	11.2299411641	4.3638414625	16.8543792038	7.53475453227	5.63941773579	3.48640075518	11.2140509207	3.75627362039	10.2069293338	8.83660928681	18.4428829255	9.13037713557	10.9782667098	8.2300732205	2.18210308415	3.89906063037	1.45060268106	1.24857201552
FBP2	0.0789235914652	6.59999699808	4.4464579956	0.349281127658	0.106556590342	0.0	29.9858936403	0.0554378128756	13.2371098249	13.6130286125	2.44750310649	17.6418952541	0.090726893585	0.0745200296815	15.7311419494	0.0104382534935	9.71089794164	11.0839607476	11.2303152928	12.7394746261	0.0283267624553	20.1778535737	5.11362894777	11.3925533486	0.0175016145582	19.746967719	0.00762505743573	13.8115269555	27.6827842716	0.0191127415451	0.0	2.1598098226	0.0910965457785	0.18324718577	0.470204715985	0.103677965622	0.10182869084	0.227346599688	0.318956833822	1.08852384508	0.253172262436	0.0866326639326	1.01460687203	0.529178993956	1.20969276794	0.21554042261	1.93649684109	0.186383479522	0.0280283073667
OGDHL	1.22613436741	0.544675951161	0.0921578629735	0.696208608904	0.971742490537	2.11739126389	0.0748721865174	2.06017721276	0.251226204752	1.32246964846	0.112066929957	0.0496559284852	1.21286917132	0.711137345243	0.605355381852	0.00475958099548	0.136499948605	0.341086170657	0.264865926717	0.195981104574	0.180828074793	0.100443161688	0.0344738544486	0.202523108065	0.0359113317585	0.0627464843261	0.37028285991	0.903771426906	0.147902774787	0.0108936616511	0.00498663877503	0.0558402494171	0.0380762553765	2.27690390809	0.0933684044979	0.00181825169512	0.0487528873596	6.66820803024	0.00938298659041	0.0151323014972	0.663781049705	0.0217262734233	1.71259914503	2.48531077822	2.94363093213	0.1655259121	0.0068983893956	0.0297451622193	0.170402707261
SLC25A10	0.690490013846	5.07470379161	8.38203241294	0.735380792456	0.351487341233	0.372563398989	2.75457044117	0.248423163764	3.77806434409	3.0175225235	6.73042939507	5.04262489935	0.349064571847	0.450544192098	2.57099303771	3.70042259293	6.69639194737	5.81020315856	9.79064114613	4.20298938349	6.24804512662	6.27363159275	9.19191025167	6.87761057126	3.53791699403	5.05305506025	0.432804194855	6.25019491953	7.06374349776	4.05868655896	4.90064256266	7.7715077851	9.44183894881	8.2976856639	5.27515454974	7.31832918403	10.3987062804	7.47661083432	14.6258064212	2.49838512362	1.27315414156	6.99642220804	9.11167678517	4.47475251346	1.39544607547	12.9063911864	6.01862234633	10.5328710523	6.85672277775
GMPPB	1.054090002	6.3476452514	5.11338402037	1.2478470528	1.00548755292	0.926954535747	2.93385935896	0.637403283993	5.08392392458	2.6885183458	3.94259255404	8.37542760067	0.678506558003	1.20133822906	1.64515810217	3.11958554275	5.76337308231	8.25944739655	6.59210512774	5.59067640325	3.6461988472	7.25194502434	4.26788196048	8.18880349089	3.6874684393	6.4326128465	1.38441954264	10.2246778785	8.4914394398	3.00770540395	3.21760241244	2.96950980152	4.50520520878	2.75679382003	2.63206944854	3.15224972696	4.74228386769	4.42918689001	3.60471186557	2.19947800258	1.33782877598	5.12456236096	5.20703992704	8.87891632446	2.17923129786	3.03682015201	4.39551006612	5.24918853944	3.03994057213
PFKP	7.21076538648	17.1283701948	25.3515102645	13.6452720865	6.35113138827	7.81076909174	5.09908315722	5.34668816995	11.9356869945	10.5884305657	23.726870198	15.8199722036	7.90125227942	6.70789233856	5.16681087947	35.1026420849	21.425023011	18.3041948678	20.2846989418	12.0715995963	30.4384417632	11.8934373897	27.9841532928	33.0920999693	27.1137683577	14.0738184565	28.1627854147	16.784486686	23.4266190958	23.5237891883	20.6639505251	34.1134104812	21.6121186267	28.9471630982	25.2829128478	67.0774075273	34.8840648351	5.56135336777	39.7119831797	32.8558237575	7.4330873676	26.6414788838	16.1412157411	2.63465155753	4.85130547768	48.1841360705	58.1068713147	29.9259950914	25.440992058
IER3	27.3872844543	236.983765967	44.714457807	78.734633867	7.70398843915	19.9516815453	62.8216890343	12.0577243005	147.03166305	98.9353960005	12.0827737413	95.30247032	30.9093680158	17.3453376925	47.4473224906	111.968974438	76.1847372334	152.106137611	64.785502491	102.368007051	158.729358103	87.5294421645	197.315113557	32.7853547759	23.1680526743	110.681674909	8.0941165552	84.9299489134	111.643013773	13.8414093706	29.7854581806	8.5393128643	79.7654051922	73.0600178175	11.1305328813	180.55316568	74.6359246913	10.6991221134	8.02058524101	50.296797282	19.7113090122	79.5724851524	60.4680406753	11.5860345552	11.2500473485	101.456970084	127.806582428	41.309712766	424.393220394
B3GALT6	3.86252194673	6.2111709911	5.17354475517	2.69655667644	3.81816590482	4.73672192048	2.6948014129	3.11060629775	5.69614935397	5.50300326488	3.29648082722	7.40343608438	2.28680956283	4.57752479253	3.97530389873	3.71819084382	5.0095098698	6.99384560606	6.57157448714	8.09535062488	4.05339445941	7.45326599573	5.04512507862	7.42006890863	2.84569824323	4.91469690268	4.63673235146	8.885590183	7.70645427372	3.13909745656	2.34350833252	3.25939098953	8.40486189292	8.76445488438	9.24841448514	9.50819792838	8.59909742376	20.23499352	17.3724898605	4.47902174481	5.29432704729	9.40841025151	16.6266135667	31.5406496695	5.00368663476	5.81613544327	10.6785279281	10.6681554507	6.02810468719
P4HA1	5.75129563606	5.69262744231	4.96601901432	6.74949360459	6.27169766577	6.81189105756	8.48418122605	6.06745622413	8.64528564427	8.16626101558	7.13782646893	5.26863368463	5.69321057127	5.36302594101	7.83639415046	3.26344756532	5.64985981116	8.85360910184	6.28142433124	9.46617248346	4.79260796207	5.47240064562	3.48571066811	3.74795431802	3.72537398342	5.5883017042	7.81128337776	6.83620371273	8.42678240582	3.40303197424	2.67624342095	5.19516685706	16.8924009343	26.7254734125	9.23468762702	41.8527750009	28.5493179461	12.4986604691	21.5188832009	19.5470000166	5.10592711235	30.6379651068	13.443389828	30.8040173732	15.2057025222	15.555682907	19.3155170716	13.8168730826	21.1640906174
NUP153	7.69841577943	6.174670699	4.99672003744	7.17031705137	9.32231005763	7.34247844965	3.00692202569	6.37559670971	7.97239045328	9.08321352119	7.01886054484	7.20396352332	11.1490672609	5.8151045763	6.3614210482	10.5406106957	6.58294480934	8.06909391053	6.62085752336	7.69444047249	11.3474050884	5.65592744994	4.17980283014	6.23837672965	14.6734058892	3.5960759379	6.84172504274	7.71436679663	8.63097915018	17.7159424559	11.720357609	3.52252719104	12.3152559126	10.3793728328	9.78544234285	13.164066286	11.5454737522	26.2098393728	17.9873533473	18.7196778177	9.9993596936	13.0304577728	11.7907932793	30.0434133807	16.9676974219	16.9401565453	5.98516619287	16.1709923229	27.1385131911
QSOX1	15.451584377	74.3641003324	26.9942826767	15.0261194487	17.6490003308	13.8878827136	27.7160463716	9.68140337989	29.0059598436	40.6240097185	27.0695617177	55.5070191713	11.8154680293	26.2484933737	33.3828322292	48.8507741097	31.2099658887	101.152054665	50.588282587	30.0165627989	45.4705687438	57.112062427	28.8109668836	51.6436144163	71.9259968218	48.7621354023	27.7809521313	98.5704199289	74.4147727392	31.4997830327	43.7150252569	27.9228452721	45.6427595063	27.9663034023	9.49207006011	70.1542642225	29.7028527704	12.6261784572	15.3320197742	29.4857882432	14.2609452923	55.1496783648	52.5333094872	22.1700622201	10.7284433681	36.2799675475	62.338100746	16.6977658408	103.90375901
HS2ST1	3.01639947486	1.986637187	2.88205212708	3.20627622693	3.30841431316	4.38091168722	1.93478592722	3.39479555079	3.7243518301	2.90372709045	4.13025996612	2.5315098994	4.10024629576	2.6162114799	3.2133945512	2.04447997067	2.86274122733	2.8200103182	3.32192998464	3.04722575088	2.67955577665	3.06158220095	2.26500551409	2.35234583776	3.50326183534	2.11512832647	2.6775406121	2.40959369263	3.76996150323	4.23536062919	2.38599086503	3.70402500664	4.95270791474	13.4535229431	16.6127640912	5.69627099337	5.28934187173	6.59549194706	5.56312715438	12.2702974779	3.87804425578	5.9913851294	6.06305042763	10.1586660288	8.38210686729	15.4877408924	3.13594894754	10.1332375044	22.9223375301
PCK2	4.84014273082	9.27921479058	169.713654011	22.5333318236	1.35272052486	1.14908444303	6.96481683032	0.904976968265	5.65767629019	19.154419821	105.02002951	5.81262412707	1.50313979763	1.61843384723	3.33781407299	3.59002162168	49.8959548026	10.2576453788	153.267396822	6.87699146275	6.86557141401	7.31812427264	122.63057849	96.3936652886	4.00470072579	7.11634106743	2.23528495019	12.2122410715	8.16681419841	2.93541870713	3.46828643048	261.293147371	15.3437550263	7.83043790182	23.7042519567	12.0449742811	18.8179128969	9.56141971832	8.42356109214	6.67877438235	3.50975082605	7.61890745805	21.3658940304	19.8430753407	6.90280476445	3.96522775427	12.0466924781	9.5341223145	3.36460125148
GCK	0.164198488794	0.119712008869	0.150558440409	0.139015196161	0.113856182093	0.103119789776	0.303915183701	0.0842461086494	0.194304187545	0.289266242742	0.0583579973683	0.0919393610382	0.0835595050088	0.1449258843	0.101381849736	0.0627890575867	0.0832171376947	0.197696575239	0.156657721818	0.190503903398	0.0627765587165	0.200851234062	0.034815992742	0.105462360859	0.0554090417235	0.141590592906	0.284857495034	0.21913027319	0.0639722646764	0.0786627026475	0.0415480645536	0.0387711775429	0.0288406094714	0.0386766258174	0.00480206253119	0.0126245423373	0.0257906727891	1.67345463799	0.0814353093818	0.0798509743632	0.0881680695602	0.0630829550688	0.0677800151879	0.689685067996	0.227513664254	0.0897878685315	0.057476536973	0.0236031480617	0.0147893179337
NUP43	5.03290532758	3.11748222375	2.96158167923	4.39297800434	5.83977058155	5.64295984251	3.89026088087	5.32803413132	6.02514958452	3.88740734155	5.16225996215	3.35621193893	4.23546011749	3.64870472817	4.22343358393	4.68099850907	3.8784218249	5.74589126759	2.78730749595	5.90259003812	4.69169992438	3.26385521272	2.22212955842	2.96872738513	3.23887477403	2.09686093723	4.45446496119	2.81618718998	5.48631149764	6.68575084095	5.75765053957	3.24205839965	8.55217126042	7.39211374274	5.51796315806	9.82764220699	19.0544525276	10.8948240353	13.0513871429	5.05006965481	5.69534767811	7.57870636574	11.8266804224	12.7535779231	10.647008075	8.82174073992	6.38357218302	11.3712426283	14.4618666843
PPARA	5.94265652855	3.85677104915	7.17830616459	6.25594195503	4.13545107416	5.25694295401	1.27936819936	5.12045095189	2.29135400286	4.0209395179	10.7233338892	3.33992559061	5.33819224545	3.35046589093	3.81071779092	3.46550568734	4.98655043169	2.91022923378	6.84744241318	2.30655957344	3.89407268465	2.99059267493	4.95325909299	5.13455139886	4.21925412589	2.62190971793	4.81840006076	3.9320840264	3.11505024153	6.96715383862	3.11152226506	10.2851050532	4.46811707732	5.96080125296	4.44502542215	5.08770565139	4.8122202563	2.9109875515	3.72776212164	4.4635525014	4.50633795196	3.18409938124	3.63621254599	3.63774029422	5.61759790274	0.945212561947	1.16197913384	1.69280585153	2.1831610968
AK4	9.5644305524	3.1255924026	6.08071924437	9.90574078298	9.27822211255	11.6942753648	2.64065022377	10.9521942339	3.44935036975	5.73368570252	4.43878875391	3.2818912354	11.9693966935	4.50989049667	7.16897307987	8.70559019244	3.80732131718	6.44541902981	2.06733832587	3.31002309845	7.40255343678	3.87843255893	1.5031970263	2.97918226699	13.2266581305	3.0925372364	9.9139330496	6.55027278836	6.98143024188	10.0420205414	8.99847850516	8.44914461019	3.6081589094	2.22475576785	2.25419765285	0.493052850398	14.3355325896	4.51999871191	1.78070586961	6.77804898463	9.51320333874	1.27706012438	3.54738745811	4.96655225622	21.4879000044	5.48760418997	0.745124369063	0.911552456854	1.97091373556
G6PC	0.0312485700431	0.0884665670134	4.78255098321	1.39477800514	0.174031385128	0.00697093567069	0.070014441033	0.0	0.0110453698845	3.42508803293	1.4434397383	0.0143724987181	0.0163281382569	0.0	0.0528286792842	0.0	0.93664726159	0.0206033900469	11.3376438522	0.00680701360789	0.0168233123502	0.0139547732404	0.397312693873	1.15185632163	0.00346474620729	0.013621089058	0.0	0.0124566276767	0.0126322340475	0.00756739311784	0.00866004864936	41.6772086187	0.0661251473832	0.0362769383236	0.0	0.0094730030669	0.173365199832	0.148523685006	0.0	0.0	0.150359436808	0.0034300857534	0.0147419387191	0.00698400674669	0.061648195857	0.0538988729253	0.0	0.0811752077833	0.00369912430356
CHST4	0.0275639048499	0.0588264297817	0.0	0.00975885824748	0.0846633830623	0.0688683521037	0.0	0.0108424647138	0.313723267217	0.00819710816738	0.17024180124	0.0709955125889	0.0322622967072	0.0156155818767	0.156573991986	0.0153112635546	0.0428401450703	0.0572479357766	0.042076865091	0.512772921674	4.22433856361	0.224029270814	0.0201636645864	0.195451113433	0.0085573649301	0.269135163943	0.0186412513182	0.246126907889	0.540792770792	0.242973143734	0.0106944624759	0.0870954971664	0.0519649647613	0.338482062886	0.215072667985	0.00779893046297	0.92109373121	0.172298739048	0.0	0.214190385493	0.222818150791	0.152491665476	0.614422354108	1.71631246204	0.234247864132	7.55464697109	0.0369861192398	2.40587622199	0.0867942901409
SLC25A13	2.6214818874	5.91877468327	7.65297480592	2.75909226856	2.04274153546	1.91984453663	4.45185084405	2.08263874171	5.14191442289	4.40805015359	11.1810776974	3.76675686081	2.17010903955	1.05224749651	3.53409340084	4.14532307101	7.2785387229	9.28483164578	10.4130147189	6.38607228983	4.0105083731	5.60369529254	8.55363485729	6.60080672929	5.46980884585	6.0868571688	1.95259017958	5.94275823978	12.1391115813	5.11280003459	4.84701288933	13.7414876637	4.26177141996	25.7328935521	20.0421949427	5.6947643091	7.20308986385	17.9451840824	8.73301370503	14.0642204224	5.17402898222	9.6721983368	10.8671373471	19.240648685	19.101691569	13.4834156595	8.20060821665	10.279928063	14.9331195346
ACSS2	5.89364196211	26.0325873934	36.8039394628	9.66159133582	5.79724246311	4.41603920326	13.9580878798	4.44960254965	12.2940525394	14.4513159893	39.5732678481	23.584712578	3.95361565193	8.0311715713	13.15706253	9.0863397486	29.4715695271	28.4308876637	37.5490857654	13.5157129557	6.28120313442	23.5953577174	40.6416102463	33.0335610804	7.29510195679	30.055129039	9.60884675188	31.5494988811	33.1437292719	8.74711387046	5.14154405531	53.088135363	20.0673764061	7.5419743547	14.4642136305	7.1452490218	20.2253904347	22.7322535145	4.76242762837	16.3358446709	10.0804168147	16.3274578786	27.7257513627	15.8805289454	16.7708877449	12.1897731044	17.0631027586	17.47555386	6.05879878799
PGAM2	0.0	0.0	0.0	0.0	0.0	0.0	0.0	0.0	0.0	0.0	0.0	0.0	0.0	0.0	0.0	0.0	0.0	0.0	0.0	0.0	0.0	0.0	0.0	0.0	0.0	0.0	0.0	0.0	0.0	0.0	0.0	0.0	0.0	0.0	0.0	0.0	0.0	0.0	0.0	0.0	0.0	0.0	0.0	0.0	0.0	0.0	0.0	0.0	0.0
NUP62	6.94130552179	9.46368444142	7.28330957225	4.82420727886	6.56302085652	6.42913880207	3.31310860406	6.93419294488	8.55106849548	7.9680555024	8.36247806043	9.46648209256	5.92708163947	5.64475961899	4.57001422815	6.6932959723	6.93892693926	9.4530817728	8.07761880694	9.11971570363	5.38223779339	7.533389293	5.60219396834	11.2843184477	5.21479066766	6.74172408969	6.64481957036	8.64789581971	8.80208472754	6.84458388496	5.01171113092	6.31825929102	14.7877158953	12.6917700978	11.5871120564	10.928056338	12.0966395294	25.6989367361	13.2218563108	15.4702515384	6.86025337374	18.4457203125	8.19845739883	16.9585605418	11.8213038716	20.4652408903	14.790994839	16.9008792984	25.0691792416
PPIA	49.6551220215	91.4090323465	105.300681928	58.9658124502	64.115896217	41.8595124009	206.905347347	50.4596173613	157.413706971	57.1411856281	59.5197718416	83.0929669211	44.0788997319	67.7925576943	35.1428961937	114.15735169	127.016164864	102.372629418	82.6880107834	129.355817534	88.2623441775	113.399510046	114.304077832	104.892854592	105.602262322	110.039615271	62.0571630682	68.8854208706	97.0657519934	84.3597686076	115.011323642	70.6729393711	127.790807882	105.057344015	179.768138466	121.423630967	202.025170237	143.018413581	101.554212724	161.520145778	64.5497585665	118.244145028	232.444290443	140.800954558	120.167655896	139.948682991	180.259070751	136.850051245	150.271916992
TPI1	50.6638720612	125.348666945	265.985373588	71.6951075066	55.8414251543	58.487203663	126.482621376	52.4644981784	146.006437248	78.4653348628	156.878292737	139.097511031	52.3903821657	94.0430354576	52.224100052	179.763948277	157.309731989	132.390669262	201.854518948	119.392316046	134.058055714	126.503099811	204.091987747	207.976650319	121.650514165	145.958989445	97.8374932107	119.764920378	143.689921849	86.1473377849	152.792407257	224.10123632	203.425925056	268.764066189	140.310856838	185.79237652	290.57835218	125.097655934	189.734216313	126.268766029	69.5531717515	158.838967892	132.613151779	183.911308542	132.810292571	214.167770445	303.131096338	159.973561752	137.7189568
PSMC4	17.549080238	33.4518857065	35.8139549793	19.9139784705	21.9478341063	17.0372354537	27.6495739113	20.3794230908	38.594141932	25.8513319779	32.1530562065	27.9626325458	18.1000100872	28.2509361671	14.1880968103	24.2763515382	36.8600323271	41.0951920642	35.1329616459	31.9761160993	23.9189959862	28.7299725626	38.5908915948	40.2359539657	16.3187891646	23.7547228082	20.0806542424	28.6212495117	34.0889470708	18.860720791	20.2686497655	29.7511030296	39.9092173366	28.3351814619	57.7196670531	55.5264817221	59.3173453989	27.474960389	36.7204890144	72.7483663803	24.1529202064	38.3688156567	32.9357761916	58.2425551859	53.2159798253	41.6465699923	74.9529919815	38.0486998684	37.3584341998
ENO1	40.7282308114	135.037084472	161.924096314	56.422882943	48.4571680858	45.3515900759	58.1708258843	42.2562613003	121.063594277	74.0471911158	104.63612519	118.405452219	54.2988830194	86.6062554007	36.2324335654	248.144040489	141.095834364	117.317639375	152.50870313	105.632468552	153.207992867	97.939689731	146.258110713	163.986798203	170.044855743	128.628231968	132.730470958	108.939132068	123.284033925	161.46530253	141.974806745	122.707720681	308.030322367	392.889975831	260.303940443	307.941420555	366.93176343	74.6365733069	176.190220762	387.274280174	70.4269520848	153.924749802	147.606659722	249.440544989	139.783170951	265.252940029	293.319562416	177.273080472	272.253933763
IDUA	3.50551815641	6.26348738552	4.06494238844	1.7809220983	3.09834930726	2.27751621859	1.83789908124	2.27167525821	5.12407963384	6.46770790219	3.49134014005	8.71640306258	2.38949894005	3.58778013617	4.80580382301	2.02285524015	4.73083186509	7.13890982413	6.67501865215	6.3942363027	4.30196770986	7.72139931027	4.72242602353	4.99198702762	2.34962456996	5.82514046221	2.78370831203	10.9314381839	7.06768442063	2.7529873467	1.47712717802	2.45533637796	5.57749988597	2.88293635012	2.08332920956	9.29925555999	1.9168869193	3.21534875022	4.86059347954	6.04155624044	3.89033992419	6.5685318957	4.09062263965	4.87145644992	3.02834906725	3.38646618589	3.33659918609	6.13548786858	4.66355999198
NSDHL	3.61205915849	11.6081446137	13.6650566761	5.41545739226	3.84042150079	4.36847164672	11.2476906668	4.61044849003	11.7369561303	5.77642738238	9.48066014961	11.0122718835	3.23552366902	5.34547341454	5.34757512036	26.5409068269	12.7840451646	11.933367905	12.2937068711	9.92530790579	16.3441232797	11.2337322859	16.7166477376	13.3580021157	15.8252387168	14.7775986797	6.03223794784	11.9921127913	12.5296910227	17.7443994776	17.6895464283	10.8964632158	11.5644919807	14.6499055868	11.4986277471	7.49811289914	14.4137848671	13.9350879537	7.9714723276	13.4525857057	8.44182361044	13.8034349506	19.0547977689	15.1885771414	10.3757515395	16.5472060202	24.5207260151	10.5164263722	12.9008850421
CAPN5	7.45225617141	54.9392501191	53.3892755878	13.6335926562	6.24411725849	5.36583420656	11.0673492221	4.31778385589	13.715547749	21.4274627601	61.2822857622	35.5557064104	5.67851020561	5.63727570811	11.1403912537	21.0890133058	41.8036419107	66.589916047	52.9733571668	14.4963822148	12.8627091869	36.5326277019	35.912792503	56.1337594767	21.5376086429	29.204392531	8.87752196641	60.4269675255	55.8453298251	18.5751298206	15.6234805669	63.6705003822	51.6192090864	11.7491729711	29.0266409432	39.5663729853	22.1441483439	22.0181826537	70.8415365838	21.2483487766	8.61606880289	37.339893485	32.5492443545	14.4066535175	16.2081457617	35.7812758266	40.1619912126	31.3525063783	38.0817012059
P4HA2	3.16700902238	3.85435880177	4.34319131219	3.73754399533	2.81727315404	3.06727728848	1.99693034894	3.45478903739	3.10658887856	5.51583958142	6.36604618434	2.57418856363	2.96623158967	5.64563038659	3.06589767585	3.43191653411	3.37785037284	6.222175327	6.07945496766	2.45153690369	3.04357768795	2.93757332415	4.69889672545	4.81313245717	2.3559556972	2.29703277439	4.91448942664	5.87701994222	4.13648660031	2.39681467235	2.65560157557	7.45057313901	5.57210955164	6.45207047496	3.88455172616	7.69864192286	5.08600894837	7.34215603029	4.39356195035	3.66559660061	2.98835283588	11.7151266627	4.93495328401	3.99764480464	8.51920660955	6.36083620418	5.50821544906	0.371911988954	12.7774070933
PRKACA	19.033820219	11.4119744847	13.0150640792	21.3598224984	17.2519047997	20.4444835787	3.99207339676	19.0121109917	12.8136358054	16.5777033445	12.8245498566	14.2793769035	20.7176520747	20.6513164426	10.7325038908	10.8416654877	12.0841469364	13.2192209015	11.9587138351	10.2429600861	11.9400830763	12.7339486252	11.0045354559	13.028268031	7.53327857785	9.08278339069	19.6357887757	13.7525062247	11.588100952	8.20240381689	8.70614536665	11.8045018171	13.2057742846	10.6819628228	9.25754417136	8.45115219962	6.691905113	23.7678214938	10.1751892161	14.4249373348	11.2012037527	8.98703905426	8.81988310999	10.3069753317	7.91939738438	13.4090991608	16.9507372436	12.0744278055	15.6829191417
PRPS1	10.7319023842	8.47999203115	4.21900408603	11.1325480919	11.702384751	9.53310919131	9.29721587002	10.2998350209	20.1188505769	13.4003250405	5.20491907054	10.2223262462	11.6368636147	12.6861946018	8.83599514243	4.22996488282	7.20477918713	11.2362214204	8.73058502476	16.4530056912	8.28501893735	8.48283735019	3.93397812727	7.18170924198	4.53786928521	7.7581899811	11.3123746841	8.42749867405	10.0802568281	5.19627660758	4.36916166735	2.44055287231	10.2630447249	20.0446702329	17.0463678917	11.9642588395	25.9186844541	47.6586527356	22.6257634831	15.6215049115	11.2013735665	13.1650301832	9.08387918651	7.71852821414	14.5196226926	15.005509262	11.5601575662	17.8155629867	10.4115942029
ACTN3	0.192444177085	0.0829075362173	0.114697534657	0.0888702621411	0.341018203629	0.0979934772701	0.0	0.0411409415995	0.0051756524224	0.108861651899	0.0303985928856	0.0538774589422	0.131598201813	0.0750527696476	0.0148527148354	0.0	0.0379292214173	0.0337902626643	0.055880158551	0.114826984171	0.0157661750089	0.0130778881434	0.0459057328243	0.082402777265	0.0292232674134	0.0	0.0113172589748	0.0466955300794	0.106546087798	0.0283675038003	0.00811587158041	0.00413096889993	0.0901381800709	0.0717722486203	0.0337687263353	0.0177554837125	0.0793464677982	0.101229677313	0.00381775769431	0.0246281756525	0.234852006312	0.0675054920407	0.0172694874958	0.127630389998	0.271095113104	0.0463026617567	0.0168409358404	0.0968218985176	0.00693336008219
B3GAT1	0.0631043333072	0.198284236947	0.0624675864394	0.0296370332265	0.0593347665803	0.0985412686704	0.328946622463	0.0810532364354	1.14076000104	0.182875868904	0.129838243773	2.27633207181	0.0942101421352	0.359932442205	3.99302509	0.0143074879395	0.29356529695	0.453220480226	0.909237780816	1.37070196608	0.148836372008	0.597833478437	0.103629764305	0.656988507825	0.0429804420539	1.3832016242	0.0592251725905	0.672005897748	4.6112228045	0.0229227431967	0.0124916938067	0.0368778915546	0.0971164925674	0.0779101273414	0.103085256397	0.0683217026445	0.095375826755	0.664787326247	0.353745575236	0.0576185061401	0.176400682286	0.0148431894659	0.0244541989151	0.156148331149	0.380323191957	0.0362816862475	0.164166572671	0.127735898876	0.0426864374775
CLN6	3.23873598586	8.69581335252	7.52066670719	2.91596301287	2.60010690681	3.3254316516	4.97037902619	2.40412472206	9.39650661095	5.40608693337	9.04955047995	11.9410461302	1.81387413542	2.51876440475	4.70648140458	3.74320711464	9.55316983644	10.9457691877	8.25328496665	9.77090816732	7.08267953631	10.4128172857	5.9909691615	12.6419142287	3.95436035961	11.2742511756	3.38677077712	10.2618317946	11.6580361577	3.81658830027	3.93191215212	5.78737596598	16.0712094836	12.5621909511	15.8329389056	17.181897539	15.2418389522	32.7971146382	19.9673796672	13.1330268376	7.70257882703	13.6282202466	37.9285065562	14.822240996	11.9492330441	22.3517499141	27.579718352	21.9511874717	16.2035127694
PPP2CA	14.6772247435	22.0096904065	16.7017661455	18.8135841012	15.174361501	16.0115040919	22.8630375338	17.1427995513	21.128846289	16.4462421249	14.8417860882	16.2926706401	16.7261237196	14.4595598815	11.6236009969	20.5592106329	16.8719843411	22.3393594111	19.793405906	18.8452189771	19.417004902	16.1116324583	20.4201609323	18.5886269405	23.9390228096	14.8936611389	13.7966867932	17.5803350378	21.3290842465	22.9352138894	26.3754027454	16.8307144248	25.7109983219	23.2125240766	11.9635257286	21.809966662	27.2228239288	20.1198126311	17.9193413781	23.8323788687	18.3433165376	17.5944191639	20.8163778752	15.659295407	25.7493623274	19.9272540324	18.2191179848	25.0147964352	33.9601488241
NUP35	1.85829360873	2.0456131792	1.48784931939	1.68342354949	2.09649959816	1.94497030646	4.34288290179	2.27445753488	3.86910079828	2.15482341991	2.00492751067	1.8499103837	1.87816044728	1.63099722473	1.3771493973	2.16482824524	2.48217840544	3.0757001387	1.65845610169	3.26612828116	1.69482744396	2.03487220352	1.75133005507	2.39240557568	2.16202903618	1.73100274036	1.60598296335	1.94833232968	2.55207344742	2.274751638	2.51854591308	1.15266590617	2.85988216629	2.5809048149	4.476421924	3.62442185821	7.84640901762	5.42997911456	3.63054791624	6.80350369749	2.65389732589	2.94514657092	3.93302974072	4.85589738096	9.84709616498	5.56530507767	4.80648605869	5.18202273725	4.66176700467
ALG1	1.85229195361	5.86184849318	4.65175350067	2.18405027442	2.06063819954	2.04670144356	5.55068223872	1.53832532445	5.96367428292	4.07294359027	4.31297531306	5.55269468269	1.42922925204	2.20317359614	2.69163060965	1.73000818105	5.10750735346	7.20473420921	7.13759473958	5.27463614594	2.61872917345	6.81842139192	4.18548672889	6.63289755566	1.41985546176	4.41362064382	2.25749865496	7.22333684485	7.34060169439	1.61158543185	1.38400521262	4.28167667881	4.87405017121	4.75154735699	3.74441359907	6.68998534502	6.91328707242	11.4524206184	5.87433604226	4.26150920416	3.0055478028	4.370344278	7.93793068246	7.65688224367	1.89119721339	7.72809456692	8.6771673331	7.990466215	5.01414324726
ZBTB20	4.79138773455	1.90458547417	1.04570556644	4.84338947988	4.07309638495	4.27664335291	0.525621156611	4.43568125733	0.738752334265	2.20789192648	1.6739278547	1.44764515172	5.47991174474	2.1059658967	3.56911807929	0.403112767028	1.1509073881	0.524962134322	1.4582182558	1.05960182256	1.65208083725	1.13056755455	0.875387349339	0.913643654479	0.83727753642	1.34484686131	1.86057295908	1.96383497399	0.653781814792	1.35270145484	0.48957360665	1.08626818546	0.761045124867	1.79246469641	1.05437841204	0.433705409165	0.600308360166	1.40835987256	0.921194173762	0.968807996507	2.87729251827	1.20853037073	0.718952189543	0.20853321268	1.03269878459	0.767123081837	0.572335512508	1.10465811972	0.362279160685
PPP2R1A	30.8991795888	37.4370827353	37.7935453273	30.2911456418	35.750402307	29.6355031045	15.4439061487	28.6564294024	31.5690899433	41.0673686317	34.7208348204	31.8741785529	28.728741222	45.9539467309	22.6873072188	44.1956874011	35.5817771753	41.327835053	39.3408349019	27.7032438414	37.8710759859	32.9237627669	35.6149593847	42.6707774058	34.2455906467	23.7907256526	45.7154182218	37.9710036692	37.4985719013	34.6161316693	35.4903768537	37.4340958525	36.160900625	34.2362636624	24.1803703686	41.6992636179	49.7059974576	60.1293467669	24.445651284	48.0617082789	30.2357536059	34.179678697	39.2236981463	38.9102389789	62.693092637	39.5655172143	51.629093435	28.2019105931	38.4360353372
ADH1A	0.156389148721	0.427137344474	0.604660833039	0.138421927347	0.161657626125	0.106842401103	1.89799998063	0.0961200342817	0.016122913702	0.193782831698	0.710220446271	0.0419590396589	0.0810361596821	0.0369158441355	0.077113962321	0.0241309491746	0.489499567255	0.12029897891	0.571960256276	0.0794895194033	0.0	0.0407395328612	0.262172289013	0.397879875858	0.0354024023448	0.0795307520555	0.0484755090744	0.236378025992	0.0430249341517	0.0938919776746	0.0	1.19677718225	0.00877480013589	0.0	0.00876620981114	0.013827731669	0.041195973907	0.111684772234	0.00594643658586	0.0230161099477	0.117055731613	0.0200275688985	0.0161390932301	0.0407781864253	0.0415328310032	0.104901496995	0.043718313663	2.58526597813	0.0
ABCB6	0.517308563079	0.741192025992	0.202694181618	0.395324691708	0.500923452435	0.392868809488	0.411689140851	0.386403153375	0.461626432889	0.449751151155	0.585396303284	0.682590140849	0.312255488873	0.360328426764	0.34456681408	0.591460922738	0.30754368121	0.900231580792	0.42612627672	0.581911388082	0.362207046151	0.605312753721	0.527311788632	0.56236056353	0.912706677363	0.543399020312	0.355586972406	0.836128098206	0.778588938763	1.08777386967	0.789676643641	1.15838161628	0.921203974458	0.975029934657	2.8388658903	0.463896266486	0.201691236928	3.87318019033	1.36463236618	0.312854010158	0.507803730996	0.886199723041	1.98371832447	3.25056203348	2.28221775946	1.17466751476	0.455174419602	0.546742777537	0.189736293961
TXN	53.9713856224	134.597704487	252.153483006	94.2870291304	64.9924054499	48.3063622885	361.913106289	72.8784905529	173.261037847	61.8697590596	204.08742169	236.443964901	65.3539138318	69.3416613443	63.5504401581	515.700634203	333.77636085	142.700594951	117.097179815	212.453594425	573.011957465	186.678207182	220.341081464	189.975648806	379.793464886	379.48554496	68.5395847944	108.862286972	159.920041906	294.380445206	949.059554418	157.473930747	181.305658044	231.750324964	159.401450768	151.658565191	345.6560198	62.3121295319	237.007487495	122.872168045	196.498033138	97.4337544084	184.582394725	99.5755464196	216.974940458	260.42211137	191.104402134	269.960230896	152.457302715
ACSS1	2.92376120471	7.62882592261	9.40078690579	2.92950740164	2.74600691942	3.54385012341	4.59357891986	2.94013684703	5.71572410027	7.31157384581	11.2681228489	10.2745092205	2.36794715325	3.57267300444	7.92380345152	3.51715456168	6.86533247152	8.36064753724	12.1303169728	8.6842048428	1.92467003963	8.95448463464	8.19853534853	10.0404972865	2.60299513657	8.22379638479	3.3798718517	8.28604954761	13.2765850573	2.58576194597	1.89173486602	17.6078620875	4.14462554931	6.01520325742	9.58047279097	5.61877808327	1.34705965944	17.068652203	5.28214209865	7.30929964915	6.20407499305	5.04073814779	13.0488700567	15.8097019387	17.277554156	6.02661876368	2.60789122504	1.74355729609	1.16017068619
PGAM4	0.250035243549	0.469117433687	0.365059936097	0.153214074485	0.431710891752	0.240274028451	0.172375423077	0.208054850674	0.428300460461	0.200191597243	1.01321689026	0.928857956371	0.112559568512	0.417687897459	0.386940726491	0.427354378324	0.199286008179	0.1553468677	1.32121356386	0.293279958844	0.845637173299	0.240496379609	0.750387043569	0.871325889639	0.403051888208	0.352118506159	0.390223527593	0.214677358548	0.217703756447	0.17932248685	0.14924716522	0.398824797441	0.362599976334	0.364697830502	0.155247856891	0.204072013781	0.903280386978	0.387826552409	0.280827269247	0.0226450441228	0.777387770539	0.206899185627	0.206425683084	0.240724561956	0.143021334823	0.309630823811	1.10974795995	0.413332775175	0.223127309625
AURKA	0.547740352653	4.01405427058	5.58499311389	0.849532274341	0.445236777651	0.474747383956	1.83524192116	0.400276913253	8.46105511756	1.41594825202	8.32053896426	4.35211827304	0.253648259217	2.50997901495	0.993121434282	2.40523670024	5.01801045568	5.0792422873	4.7368303916	4.80441252252	1.72333231321	2.80399435422	7.27850444989	5.66159988697	2.45712985127	4.38524635488	0.598129505409	2.4538875833	7.22370507432	1.63554935845	2.42736904601	5.52266100145	20.2804151723	9.78257090425	17.2420958068	7.75599106475	15.3763409822	19.4650385072	8.79545396491	10.8271617212	3.39642522357	13.5373301322	14.926978245	35.7003342905	32.5201877626	23.7484422872	14.5174484424	14.0887577717	13.9995077441
GNPDA1	5.88395911529	7.07262482843	9.32234600763	6.72366485671	6.89401434208	6.29365849738	6.36697847579	5.99811662752	6.99434872126	7.02020748273	11.2384302031	5.77645999477	6.49995276536	6.12736220539	3.80688717782	3.9135940118	5.88877324597	7.98926748171	8.96639033412	7.09724913281	2.84644272312	5.997571999	8.33768972968	8.41409120896	3.28957227786	4.56771753162	7.83796613363	8.02276008393	7.09522704085	5.02494771969	3.66071909541	18.1561871306	14.3361492789	8.73061115387	27.3274540367	12.7540629385	20.1460005424	11.2540441093	14.5931498752	15.4997065953	8.20761337136	9.21627411636	10.7151898816	13.7528757587	18.8856559662	21.3448426946	13.0591161271	26.4047183877	21.777485347
DLD	12.2146029414	10.2391751999	11.2139330248	14.1832168386	13.8820172409	17.1616937754	10.7628917565	17.2544464664	11.8615141204	10.0926534653	15.9162269482	9.07385018146	17.3142382508	16.6402585406	9.7527464484	8.75823442093	12.1878164633	12.6872402073	12.1119554441	13.4005806445	7.42956079062	9.14864294408	11.669282332	10.309358747	10.3357949768	10.3871304567	14.6152666048	8.76307184262	19.2215798492	12.6452210059	10.5415492209	14.1338033283	15.8276165363	9.79044515591	10.5769011352	15.7519409467	21.9078307859	17.6674243232	18.6975335102	12.2725540974	10.6742280023	11.3567673051	8.6124971022	11.4553421036	21.579630266	21.271817274	7.83915318122	14.8765778176	12.5443469177
NUP214	6.65052577415	4.87332905927	4.04564776066	4.41783669758	7.43747073919	6.28406742344	1.29474569188	4.38553334915	3.58007311471	5.99210207298	4.94371138508	5.21879930792	6.39613802111	4.17673299112	4.63635684451	7.08001993361	4.83785779731	4.83762929335	5.18011404372	4.28896680282	5.85542285513	4.65865072961	3.15600097368	5.40704603691	9.91867024181	3.6982956561	5.51394627656	5.6264056218	5.36040499301	9.23061134444	7.39920072725	2.60607495683	7.32653489159	3.6971754111	8.71579974243	8.30414675463	4.09382208529	9.33876807323	8.10536819008	7.83282402395	7.81077714022	7.60628422205	4.44528930269	14.43860145	10.7168864112	10.2933670357	5.21920353886	7.54345824211	14.0899537107
AGRN	11.0878653838	15.1428468318	8.99347786427	7.56115302891	8.6522443341	9.29684103774	1.27785419778	5.57358722823	7.37383061761	15.5950984855	14.365224101	11.1273867674	7.31974622924	8.04658683178	7.32392688526	4.09873188873	7.92170218512	13.6032168708	10.2876703114	8.10220644808	9.26222333137	12.3153377352	6.31814878661	12.8526326289	9.80523563137	7.40740095047	11.8413144457	14.8496896638	18.0339423429	11.9401336437	5.93263724659	10.2151388442	69.4227570418	79.7816821189	25.6405191473	121.122943149	10.4970159905	22.5921404049	62.1029320991	15.3750124728	9.71698582491	39.8532117604	75.9159032444	100.721680773	12.2652959002	57.4843687741	38.8715855109	24.2280851771	66.1941314873
XYLT2	5.55524912952	7.72659753419	3.01681474969	4.17208756738	5.62565781595	5.66427250664	6.14512713026	3.91611615986	14.2774647282	10.2373589528	3.56323992301	22.5691095221	4.47496023047	5.54233966054	25.6984646969	3.72910039693	5.24129576404	9.93128583133	10.8927080439	19.3936196469	4.9923589324	16.8698519241	3.95692633301	12.6792123343	3.9109487861	16.3680086847	6.66835101059	10.5943982619	40.2992151625	4.83618375495	2.22213809729	2.51436419721	9.23688508793	4.12984303126	8.18062154892	3.30375136784	5.33051423964	3.11760242582	4.11007221002	3.37161615003	4.71554158875	7.97918182165	5.30780917276	11.5264700822	9.56892036908	9.49342492435	14.3852522524	6.14743603058	9.61437018184
CHPF	21.3904514328	52.5632866916	54.9179014183	24.7533919534	15.0654744559	16.5162873504	12.6205637352	15.6642565062	30.6201627644	51.4141442902	40.7613386091	51.4535796923	13.9694554385	21.9449394333	29.0568950738	13.662534765	38.7327642025	48.7347698396	69.1347450828	40.9050779808	51.0850864325	56.190887397	46.7300301296	46.3662345248	12.9451678307	28.5379766038	26.6538725055	57.0930402657	65.7351429713	18.0521809873	11.0293388108	58.1144704843	70.5405450382	90.7995542207	108.973789171	159.196431924	30.0480254229	108.413825377	64.9854992582	23.9759974764	25.040276622	121.883673111	82.9743471762	76.8098813125	22.3781056356	76.4046253267	85.3301397634	3.54620410076	161.237350735
BPGM	5.59801086529	5.81281121	3.81307188078	6.11408035717	5.34674131839	6.02231734637	8.54358179543	8.30316075893	7.64243889767	6.97099964327	3.28967639753	4.81367191411	5.96889338497	9.20341024876	4.60168382685	17.3130911583	4.45082223219	6.86710422229	5.27457699356	7.21943444969	4.87741330304	5.81503480295	3.17234508739	4.07492605939	10.9970143976	4.8449232031	8.78279582358	6.33885843653	6.29703185249	4.66621136876	9.66814789269	3.48480824389	8.09239785702	6.73951248805	5.59364632067	6.14048590345	7.41630908509	5.24081369428	3.95566610892	10.3708772375	4.37223212418	9.39532775784	3.4207800771	6.83144237087	7.30106492272	5.45173265807	7.13056543633	4.6940888531	5.33983963743
NUP50	2.27832805754	7.74171718238	5.24131796927	2.83854952496	2.59539533529	2.51915100038	4.33189613275	2.09785268185	7.41634840964	4.40297051739	6.56952632048	7.86491881764	2.58412201872	2.10945334939	4.40436979853	7.22528427622	6.50650368732	9.4886958536	6.19368494899	7.97853354737	5.80627966675	7.64739021233	5.13496234189	8.25392203344	8.09051478972	7.7020102557	3.06129372221	7.24100562086	14.6811647935	7.23555592446	7.17191122	4.89585419474	11.9457436902	9.03530012234	10.5907249164	9.64192424238	11.4514307887	8.72085211937	13.7256838848	8.88665526607	4.30166092913	6.70477765315	6.8374522525	14.0764125324	10.0230135499	12.8696011101	3.22565470328	14.4014176584	17.315196176
GFPT1	5.7121874477	17.4129786649	13.712599878	8.36387095761	4.29551747853	5.27499020778	14.4011296071	4.21217952892	10.7643944116	12.8119783645	20.0128108518	16.0933598459	4.86943757635	3.31568624218	10.9941617878	4.82590269133	24.2948519497	30.0442323962	24.0097706265	12.1593255664	10.6571376394	14.6217818107	12.3787995164	16.8342479512	7.08038121308	15.8748216099	6.02137437979	24.7240652274	31.121219755	8.53394365302	5.99780943028	24.6770192596	20.0727323917	30.6976239518	28.3973694174	27.1496339128	30.1624943567	39.9085595531	26.7798999027	21.5341573345	9.83790975124	17.787197531	19.0033666352	21.6730760054	32.3939451829	15.1765835536	14.5234703492	17.2176206442	18.6817709989
HTR2A	0.59649780036	0.215363188852	0.0331046528111	0.314927934042	0.701586760754	0.625063870466	0.0879270972534	0.581446449197	0.14241142622	0.324825715122	0.161584412343	0.092654572106	0.70047016331	0.222322126755	0.256974326715	0.0193768432561	0.152480903973	0.274702098022	0.209669826768	0.418878248474	0.0723027516085	0.122674962483	0.130778191798	0.0618372477186	0.036549868952	0.167638211281	0.943051755918	0.160607216588	0.0863711782667	0.150788112083	0.0	0.0671664399267	0.105690782576	0.309457707476	0.0915090052618	0.246127395	0.0543454508456	0.237392053106	0.0477491245053	1.48161160396	0.910569334713	0.800073600995	0.110155624597	0.112558743158	0.350178481599	0.0684405792764	0.115847312386	0.0216243279495	0.010839539211
GPC1	10.0574631168	7.83111047473	3.21920563661	8.87400118336	10.9664797513	10.0071311953	1.10800017285	10.7742317322	3.96684051394	11.3218065513	2.5411253762	4.80551420614	10.6131896329	14.5237596917	5.17613388959	28.9768944651	2.50638626826	5.86750146313	5.1403338491	4.03199180989	33.13419356	5.84465994368	2.32633586863	4.79014704342	32.7679659338	3.33475030925	15.4834479481	5.97330854689	7.0734927358	30.1250069257	23.199276207	1.8573263472	18.5151003109	20.4663989686	7.46076026807	23.354970881	2.67567543444	13.711998801	20.9133163178	9.18281561329	13.5127198221	9.79433718859	7.77013291574	3.56276092236	13.9198872352	23.8080817706	9.12016624542	2.43379753508	27.5206491661
TREX1	0.0	0.0	0.0	0.0	0.0	0.0	0.0	0.0	0.0	0.0	0.0	0.0	0.0	0.0	0.0	0.0	0.0	0.0	0.0	0.0	0.0	0.0	0.0	0.0	0.0	0.0	0.0	0.0	0.0	0.0	0.0	0.0	0.0	0.0	0.0	0.0	0.0	0.0	0.0	0.0	0.0	0.0	0.0	0.0	0.0	0.0	0.0	0.0	0.0
MERTK	4.17303092362	3.3405902359	2.93135361453	3.53843015213	4.05704298894	3.39021222417	1.42388517696	3.2232605981	3.64055391392	5.1739335762	3.92957921088	2.29803410993	2.77332108146	4.22100474507	3.9566747479	0.956432737658	2.93554650239	3.46768205589	4.06800250765	3.62316189157	1.84832125021	2.58354515031	2.42366533305	2.85494240038	1.99968048507	1.60476136211	4.21952021438	3.3893900832	2.36231735719	2.05639882768	0.959548130857	8.14220825827	2.92143714975	4.17784089173	9.56223575137	1.48364695977	2.3269264126	2.74277951748	1.02559836555	6.56079927278	2.94538994125	3.43496669244	2.63365048875	6.6143715028	8.5068133579	0.749660692704	3.80581501019	3.78818473719	4.32178609186
RBCK1	14.3699047631	21.1476629397	27.5291842964	14.2141844649	15.3777524667	12.9269696296	11.0845129087	13.1927804548	22.9298804543	23.9658509264	25.2434449804	20.1306417433	10.1670220469	20.9667347002	13.9376549705	16.8852239055	22.7932443273	26.9297776997	20.1498201824	25.0787162024	12.0848240788	20.3399559051	37.0503311391	27.9583653972	11.8426540761	15.0840427663	17.9577492702	22.2936488411	20.3557610891	15.2324251648	11.2641924237	30.8335970387	44.0092076147	35.6732041656	32.099008696	29.0168190987	35.5926955015	33.0529130804	31.178526543	21.1979897874	19.4506322583	17.9725855439	68.5462343081	22.6331525837	20.3417739565	40.9985759493	40.5608736213	40.9091357647	20.2336657353
VEGFA	3.72351968105	9.88049744193	5.03370877862	2.95821755761	2.0319803125	2.76953134273	3.7282112848	1.74260895302	4.15620024474	5.66319549481	8.95778477281	6.5521463881	3.51523918555	2.44235917191	4.63210762975	5.55127962568	5.3864859931	11.6632177503	6.33266514414	5.42591295212	16.7682224432	5.9250626917	6.69649166256	6.2556989689	6.58314360127	4.43942355394	2.81055041307	9.35739868481	6.7907211418	2.27799350913	3.70466451475	6.37885948632	15.7494729171	28.7895284125	32.2403410517	19.8467705017	8.58867604669	3.48578295684	14.4030762243	4.74291355671	2.63057226144	8.20164474476	9.55391224978	21.6219544691	9.07852830505	14.3261717731	13.3021301883	12.1084296759	9.75486480718
JMJD8	22.1348291739	19.9792329188	15.0602857155	21.6788875358	28.213564812	24.7691700208	8.5460184891	21.8388474387	19.0619790963	30.3728069872	10.993362695	18.231003079	22.7439044575	34.4381497329	15.7552778108	19.5176665114	16.343662113	21.7788891334	17.2708312839	18.8318221004	23.7460381403	21.6668173174	13.6778444391	23.7077620807	15.7973223891	15.5859687462	25.6097001852	21.4428113804	20.3081058379	14.4032005123	13.8208442646	12.55422992	20.2584916355	15.2577522122	12.4551390174	18.3709091447	11.5384078099	33.0568619703	22.821391422	12.6282540974	25.002471539	14.7527479029	25.2102752626	28.7762984403	8.74624188782	19.2561981727	33.6393302075	21.9157386112	16.545716923
UGP2	12.9715388227	11.3201666179	11.8052907896	16.1632002504	11.4006938546	11.4845644635	17.1153269385	15.4583924103	13.0712420743	11.0165151956	17.7918933245	9.94843339138	14.2104830541	13.8284933337	9.83883925788	13.1017920391	12.1734180267	15.001095137	12.3498886803	14.2318671945	10.4581687368	10.6471718498	12.4509226626	10.0351649981	15.3776137651	10.7762087399	16.377672441	10.0445949534	13.872204028	15.2936141079	15.8912039383	16.1391803135	9.47509268413	17.6709394527	14.7716722401	10.4028654637	10.2728687144	10.7689043793	8.24228845943	15.6084496733	15.179109632	10.28727871	12.8879816111	11.0418146685	17.824912695	10.0791805207	8.7392875357	11.9387012347	19.8662441778
ALDOC	8.05027564174	16.8528996093	35.3221670751	18.3249893732	7.4859143549	5.10843879265	12.756620225	7.96600474276	6.47789818699	11.5853707903	21.3011274527	12.0694432405	5.51409259168	13.0053922117	7.19567027234	13.8964062352	9.10531339494	13.7823731928	16.3200107824	5.50170365418	8.91966504968	12.5904844533	27.1412245059	14.1638976193	5.79960649021	14.7503741028	14.2429588476	17.2192797274	6.73548878649	6.49108651636	8.01324239286	43.5114234696	11.0300556326	11.8879108391	8.29824450222	13.9586511967	22.4608947818	5.06638170411	2.69183080157	6.55546185088	2.55013986886	3.71446422908	7.04447166759	13.4082625264	19.1587251937	6.14820221871	13.0474977873	3.32282022918	0.632934317994
AC016586.1	0.279644680286	0.295127332871	0.680484530005	0.0380795214364	0.330360481569	0.369500356252	0.0	0.0211539022815	0.159673417277	0.159927497798	0.547063565973	0.900340387535	0.157361238874	0.385907296565	0.0763698802284	0.477962133652	0.390049917324	0.0992818327406	0.205232370117	0.0656020960573	0.297244645502	0.302598240791	0.393397812727	0.67791945647	0.918259053299	0.0656361250516	0.290956138995	0.420174435316	0.101451860186	0.820464727513	0.166921171627	0.169925352293	0.579342067451	0.252500690918	0.245979334657	0.441260977167	0.233134107975	1.01932044531	0.490754890748	0.151960164508	0.241513013508	0.760315616356	0.284148713557	0.336539272472	0.479874215524	0.19479241794	0.404100389332	0.0711200119228	0.409975460825
IDH1	4.65624590952	23.1470848966	31.6939453523	12.8494065899	2.8276656721	3.63307271003	43.2597593551	3.40200990642	20.8632040121	13.4276089223	43.3699553037	17.9312280385	3.65927378225	2.40127361658	11.5147855676	29.2116768208	31.884996204	42.4483776483	42.7232498747	23.2628284238	18.7572698788	23.2848737375	29.3801919282	33.5421508492	18.6741967833	23.7075848489	6.79750208652	29.2295546807	43.3144472892	20.583463161	25.4781602939	75.1111989573	20.9466579212	25.7266084499	65.0509402047	23.9061221753	46.6270685068	81.1852371898	23.7710899706	46.9835979423	9.61566593108	19.9481755598	49.2481301921	54.8396340412	45.2682843811	31.5777448206	20.583771107	42.5769193513	38.3046805477
KDELR3	5.41558569741	31.4178268842	21.6518959507	10.6129935888	4.74874913547	3.04920073431	95.9950822758	3.22539436964	22.5151934645	15.0503962749	21.2756800784	20.4074282265	4.25183704462	3.73783925818	11.3464500746	1.09455558601	32.0081842841	43.5563142197	39.7340082288	31.2172114203	29.6747066454	26.8363383316	30.1307239209	34.9755832798	1.36161472515	27.4863267813	8.57854537215	37.4600305273	35.642641836	1.04087158174	0.961808617231	27.8446341861	21.3644776103	31.7706826992	21.5795728293	65.7372131734	18.84796807	10.735497366	57.8706715312	67.9377737033	5.96037590787	48.6273993005	16.4609603509	31.2472789071	52.2950949148	19.7773378115	26.2833141919	12.7100199224	5.68216175239
PRKACB	14.1692306125	5.86904334652	2.45289900599	12.2781843569	14.5797380755	20.2791458522	8.61643396852	14.5746174798	15.3736318326	8.15795631842	4.19188183206	9.00978415927	18.9392972491	11.9935171099	15.5417358813	2.56448345692	5.41969847763	7.84785269883	5.32313607489	16.0851855585	5.67953691744	7.72960902986	1.61796979763	3.78949924999	3.90954342677	7.44471652918	14.2902696957	6.7594659232	15.2706003234	6.64691026142	4.14792910856	1.36651039437	3.19430105452	3.81783122625	7.61028800703	3.14085932533	3.50283131207	8.74632434152	6.62973251316	5.9357943368	13.6426933297	3.75788166907	3.75791951329	5.3580552586	6.65850685007	0.81390234658	1.73082947483	4.45259885641	1.04350262909
LDHC	0.126417672248	0.192713217836	0.0	0.0310816141558	0.132750692502	0.0274179044995	0.0157359425602	0.062159151525	0.0	0.00522149921211	0.0701688760719	0.0	0.0256885650094	0.0	0.0	0.00650211017139	0.754991950436	0.364665251999	0.0134013308983	0.364115118355	0.0176450716011	0.0	1.2672855172	0.0138334399829	0.0109019603811	0.0	0.0142492123441	0.0	0.0	0.0238111004452	0.0544983682068	1.10958416199	0.936294210967	0.126829794447	1.16685993631	0.00993572573063	0.14588964943	0.0141616855653	0.75627319794	0.0578826784142	0.189244755597	0.0755502992863	0.13336001079	1.10426647581	6.28191833614	0.883306907128	0.00942395725547	1.05651408643	0.0
NUP58	2.94921668798	2.71170537284	2.45930321564	2.60788819261	2.70353991546	3.04453441599	2.98921758607	2.26438092505	3.5490335603	3.40703575101	3.005677643	2.58631059642	2.89691441305	2.03551102541	2.47936113174	2.27424124043	2.87624522059	4.23696795527	2.64001846741	3.30015932964	2.97767355508	2.10732875807	2.03280449505	2.66118512025	3.39569862254	1.95570713194	2.25996035216	2.83247123654	4.00431718689	3.88299771827	3.10303286841	1.93073646183	6.31552894877	6.63888624092	9.43078221621	7.32391782792	10.2795096118	7.52962907127	8.28916371322	6.00386998842	3.41421816609	5.86973704302	2.55022243523	6.96961789686	6.7787807598	8.92202355195	5.58083276399	6.80774511364	12.3853411236
CASP6	3.1729303136	9.21198275036	16.3215422793	6.15971046239	3.09530990974	3.98506471338	21.6159046687	3.87237260087	10.7174309766	6.81226939152	21.1774054155	7.87497535527	3.49550901404	3.66085604235	5.20667282249	3.07772683231	14.0841257993	14.8190015461	16.4582206877	10.6001912865	2.57794677718	11.0667169278	10.1466265291	11.022645882	2.62720131969	6.65455046123	4.41456683481	10.9457278528	15.2571901778	2.72142618419	3.40818153412	35.3008768858	13.7562582375	6.20852405518	13.0755170359	9.91487502468	23.0482402475	13.7502277401	7.67062775609	10.6633333349	6.13848269145	8.87338292891	10.128007801	12.036847564	25.9430564425	8.3507098532	9.00281355579	12.7936958555	12.5750883499
ENO4	0.348773998314	0.0354451284737	0.0294217078713	0.107017416123	0.263697251067	0.323148254327	0.0312580274939	0.141765911497	0.0575308772743	0.252386214287	0.0337900920287	0.0898326594973	0.197308314431	0.175634167843	0.0935555169928	0.0430528470578	0.084321789965	0.0751203247727	0.044367554096	0.0850919728885	0.0175251698819	0.0436108716185	0.01133940598	0.0824366342847	0.0577486902615	0.0141893519391	0.166683659147	0.129763099944	0.0614097985553	0.0591232483796	0.0270640205578	0.0183674053364	0.0438351741302	0.0125967961141	0.0875845210334	0.055919859655	0.13019847307	0.154719995505	0.0509243507366	0.0602269425707	0.271496045021	0.067890546846	0.0230354440668	0.0218261247507	0.177840326938	0.0889002059121	0.00623994641284	0.0999366539219	0.0192672466886
LHX9	0.00563631963565	0.00214802502377	0.0	0.00623596836394	0.00832313914934	0.0	0.0	0.0	0.0	0.00104760015795	0.00255965933678	0.0	0.00206157991552	0.00665229969179	0.00166752850911	0.0	0.00182500713772	0.0	0.00268873666271	0.00214862256767	0.00354016711398	0.0	0.0	0.0027754315997	0.0	0.0	0.00667064735447	0.0	0.0	0.0	0.00546706001691	0.0	0.0246672556205	0.0	0.0	0.00398685029797	0.0190892225933	0.0113651527521	0.00385760979052	0.0	0.0664449899642	0.00108270088519	0.00116331713317	0.00330673523804	0.0329308707291	0.0241018774161	0.00189074798412	0.0209641253303	0.0
OGDH	40.1108324459	43.8046000977	82.5126545391	36.0650051185	33.5997242043	38.5082942555	9.24462462733	31.1991880517	23.6286623031	39.0425075996	68.8796530639	35.0878321565	38.7424336625	48.0510137097	28.3677312649	29.3799470502	45.878789982	37.1673450873	73.4066002487	24.2144261913	26.5682876062	31.4548838493	83.2249760139	72.3469528357	27.1971059152	24.8258753496	55.8079563618	43.8939999348	47.7014106289	47.4953645056	22.7909874566	86.3295478528	47.1302666936	20.4891281152	36.0529997294	29.1794386124	29.1891062774	50.6418478098	24.7305198405	37.7425298112	34.3833686956	38.7101596914	41.9585116414	25.2615679579	36.8224446303	25.9599593672	26.359622413	26.5872813862	31.2717635381
HDLBP	30.083068812	50.211765687	34.9960982821	30.9928981152	30.9087040539	26.8737844586	14.894866635	25.4869132857	36.2546214141	46.1699002061	54.0110211884	52.3998037323	26.0676242263	37.2702437141	46.0579212229	41.6529757132	42.6500195077	65.8475957061	67.8525103708	42.4794304861	49.4064068877	50.4671865541	32.3760910001	50.8988433318	45.0305106623	44.8619412554	36.0616895052	76.108207698	76.3699755882	52.7230553079	33.2273569249	43.6240170205	46.1783660552	50.4577714612	35.6893406638	75.2219627971	50.0358577185	26.0009337485	47.4146282085	56.3972295783	23.5058973739	78.4493938428	38.1422239293	54.601361473	66.9562796827	51.8305814737	20.4611541154	44.970277603	69.0594186444
PRKACG	0.0182891391036	0.0	0.0	0.0	0.0540150522047	0.0	0.0	0.0179854184718	0.0113130948226	0.00679865807916	0.0249173052778	0.0	0.0	0.0086343459766	0.0108218351101	0.0	0.0118438312816	0.0105513942813	0.0	0.0	0.0	0.0285860364203	0.0	0.0180118438559	0.0	0.0	0.0	0.0255171192183	0.0	0.0	0.0	0.0	0.0246283389768	0.0330277712077	0.0369063426107	0.0	0.0247768380757	0.055317708998	0.00834496818575	0.021533199197	0.102669298471	0.0491851699829	0.0	0.0214598690837	0.00971422544078	0.0460044243738	0.0122704726229	0.0604674806156	0.00757757222158
COPB2	9.93623183586	17.0615864981	13.1869363611	9.9334322512	11.1302900005	10.4245709589	12.2642784122	9.53588009125	14.0644610665	13.4781504901	19.4322781967	14.2051541103	10.0342701623	9.62139522271	10.7812939244	13.4936478603	16.4208977685	23.4923496766	21.438818848	16.2898420384	13.4131567797	14.8160269621	12.1560068463	16.2856739429	17.40413247	12.1063613214	11.9172318266	20.0138658018	23.5293178973	17.7373697775	16.4412352746	16.1063860505	18.5801526335	66.0387942616	23.1201499142	25.2866862648	24.6905186059	16.0770634964	30.0035620927	27.4374604773	11.7739499135	28.7250054391	20.0594066753	70.3598545391	24.5281376834	20.4130638294	13.5983427437	36.1915711498	29.4154292238
PYGB	67.0597386297	53.2316302083	26.5219225814	60.7875299476	74.1281617555	76.8937644282	11.6128020272	53.2846845528	21.8888914359	55.15242388	29.60447466	28.1329358726	66.5946994642	91.2462880519	24.2893089699	47.9142082638	24.21064422	54.3012153631	37.426017214	19.2565759298	48.7983250056	37.0560425923	24.4425077843	39.831139482	54.4520938866	29.9936259278	160.721374776	85.2984424728	44.3501455359	76.6298651153	33.4751567428	25.3292841851	47.8553122544	51.4520538931	203.623968743	97.7842025176	17.7261127212	53.7704308037	27.7784555372	63.1295644892	36.3620783953	35.6198504735	125.882897483	16.5055588396	22.7850002067	47.7083813638	73.3904784036	29.3627092229	25.3575053689
HDAC4	10.0688305144	3.58559398461	1.85697753251	5.79360776347	9.61681597404	12.774583783	0.453762054016	5.80156214097	1.75110425393	6.23463137577	1.74547512865	1.36076856804	8.73931207754	8.6278340469	3.12999966031	2.45883414963	1.8132969483	2.38630658259	2.11492510096	1.28392253078	1.96335740223	1.37282900266	1.02657759569	1.80372824863	3.1103758633	1.01759561559	5.85816940717	5.09527508679	0.932300702962	6.28497585373	2.0775617369	0.967270323365	1.66446432135	1.59309768194	2.5742104951	2.39715920497	1.86386952348	3.64977771962	0.804538457699	1.56154756123	5.10117109752	2.73336164444	1.32850364091	1.09086758163	2.34078679278	2.82064317217	1.32330181354	2.72742692043	13.3095776399
NDUFV3	8.5730851183	3.60218142897	7.53622942942	9.23836196801	9.54711152738	4.49565913783	7.49741401331	10.8548023962	8.09011980871	5.24798114192	5.34769878138	6.16691414816	6.91103776241	9.73252728075	5.68336343661	5.15679334648	7.91101850552	6.86044505502	5.64170685512	8.50054280713	4.21807591853	7.17651430643	6.95505012457	7.6232283277	4.89368726783	8.08041214962	9.48178596054	5.94016818706	6.75666510774	2.28783582836	5.95612623186	6.37015196561	6.84182437615	3.73959997626	3.25534202992	3.27402911188	7.18780563255	8.50082796365	4.54763414335	3.38278414439	6.57655351507	3.936010698	4.34394864898	6.89671601839	3.20240273514	4.92774162151	4.28469239558	8.24185102709	4.31582924828
B3GNT3	1.7201050578	79.9416703704	76.5031405848	11.6931436855	0.324827415636	0.379441873482	26.9780459654	0.289259618159	33.122553754	23.489700494	53.3049201498	42.7601637308	0.327442682193	0.211318206724	25.3579864629	31.0563218446	56.4993371395	89.2538498667	78.285205257	15.2790446356	43.0471689695	56.0094746397	88.1978405759	118.443223733	35.9617106281	53.9872959949	4.34180910623	85.9503628462	72.7828078451	13.8314450092	47.2748179258	64.8263003544	41.5041563524	17.586871912	22.5468668823	42.0242012525	57.064360231	102.364214458	15.4810837724	47.4004764515	10.3381424505	40.4071912984	81.5947664451	9.33876736302	32.5645913915	48.356604001	87.2012362215	21.3949766245	20.6384449714
TALDO1	21.6224001323	52.3234734976	54.0780716319	33.1538941545	22.9755334348	17.6966469517	56.2794283773	26.8247249562	59.5330513577	28.9183828643	46.9896264374	73.4143982176	18.47168538	23.5643599538	26.9268252979	104.727865708	48.6976997278	65.1291465888	50.8073665243	55.2871761351	84.6475775221	79.7908764211	55.3032753982	65.5232278387	83.2182552498	74.3421181523	24.0604944636	61.1141968353	59.6295479092	74.1291656024	127.006792205	53.6035885407	55.8734070022	66.9620585643	94.1948935361	59.4743945601	84.9058129012	40.854978353	83.5917879181	34.9639858046	29.619638199	47.3930690903	67.9524391519	68.9084823114	28.4984372961	65.5721192319	62.2781039193	80.8852510707	55.6221060151
PPFIA4	0.377427576987	0.154814914904	0.00639334388962	0.330040825949	0.461993128697	0.513633075268	0.0	0.39351880688	0.129390244185	0.489084550183	0.0330416764743	0.0292809863655	0.422467995214	0.430791332603	0.0914833591528	0.09682832346	0.0157055523083	0.0752054513383	0.0115692956555	0.0416036368939	0.0990138096332	0.00710748932733	0.0129362915239	0.0358269991933	0.523520403539	0.00462502416146	0.393640546224	0.0845926544191	0.0157272853825	0.14260719978	0.0764532326214	0.00748357763525	0.104098942418	0.34352948007	0.0611747246942	0.0954242166017	0.110887006956	0.113087777541	0.114808433739	0.00713854280579	0.343766045641	0.528765369322	0.11262616415	0.160070240136	0.293055975031	0.0472783493013	0.0996617216504	0.0601373295418	0.189661004366
CHST1	0.786869438772	1.089883687	1.15983677225	0.636556462425	0.76465000038	0.5317954053	0.331753303112	0.881968102943	0.701314296241	0.808319004683	0.822280626518	0.803603677608	0.696316695303	0.431399531065	0.400513690445	0.223245970706	0.449295978042	0.590638413236	0.952542556461	0.606376131124	0.589889760705	1.23649401901	0.484836223252	0.57495483517	0.279092379941	0.361432739215	0.520709428281	0.779115859193	0.638464150592	0.175699289549	0.205171940399	0.384310759384	3.3155423368	2.34920468531	1.41142531193	1.64882911422	0.699201230676	3.34818200669	2.69081555669	2.26131405241	2.04237514471	5.96483825482	2.47278007856	1.37665656622	0.498835810666	0.893872050123	2.14007556059	0.734306966115	0.44520524453
IGF1	0.265634649647	0.26626054416	0.314636794188	0.210960642933	0.530897096386	0.390655131193	0.379116157872	0.377521428574	0.477184017405	0.376042210476	0.480885196813	0.538914496265	0.280833478907	0.96374227296	0.368184603728	0.0151597981058	0.329904962841	0.230925098782	0.631852783259	0.632544706586	1.04449463503	0.352625920764	0.476922487445	0.329696701162	0.15674516983	0.410812180736	0.765343807488	0.38584585217	0.253992202557	0.0555160503147	0.0600024540523	0.145519726389	0.254804484421	0.420559882266	0.072205515238	0.0077217801678	0.13967290134	0.106392136332	0.0846766099116	0.458417234246	0.44122788015	0.111839373248	0.261362706293	0.0967794895586	0.220334056597	0.0457654994543	0.353995624494	0.300767207588	0.168856081972
TKTL1	0.0524046469357	0.0491609365439	0.0	0.0214079939692	0.152390520982	0.00629485040291	0.0270959997234	0.00396418333166	0.094754142965	0.0359639699157	0.0659045657951	0.077871379356	0.0117956260153	0.0190310447621	0.0429345189668	0.0	0.0574312246173	0.0558154303517	0.0384599838794	0.0553214388122	0.0	0.0504054055894	0.0	0.0476400933108	0.0125148531498	0.0	0.00817865749613	0.0	0.0380236012972	0.00341672982416	0.0391007128059	0.00796088636771	0.0814253371514	0.655171445012	0.0108460831526	0.0427712576829	0.0327665198332	5.83214100782	3.332852261	0.0379692246662	0.0633624278727	0.241598324978	0.0332804315193	17.6523238843	6.12789043251	0.0527273723083	0.0270454663702	0.039983086155	0.00334035991905
PFKFB4	0.431265207334	0.400333195595	5.59933915412	1.19420172679	0.293163666505	0.364940524832	0.323891923991	0.172958350863	0.551418433007	1.35596101571	6.64807196416	0.356820167946	0.186823632934	0.275259895831	0.299376933465	1.95395490892	2.98005107715	0.492052273057	6.15120429906	0.576787120632	2.19425725627	0.395404283857	1.5920919635	1.64670487918	4.03348880757	0.198488285157	0.281884901257	0.430268686528	0.361339397623	1.73169512883	1.00488895937	13.4199986901	1.74223821935	1.13340499828	0.724411616493	1.69569908946	3.90586478754	2.77157543531	2.15026340708	0.94176982255	0.481491606691	7.64194573295	1.37445947857	2.33886803833	1.25410061892	0.853297325158	0.727397715949	0.629284585601	3.68943764958
GOT2	29.8179208456	26.6344973121	20.3186970805	23.0897190398	31.3439881684	31.8591973273	14.5313030912	33.3761394577	31.7122599963	23.0080038682	25.8869475023	25.4217521033	31.8732473332	38.8891263765	22.2393309211	31.1177335954	26.287754632	32.3405165804	30.8416186712	32.7959963537	37.1234783234	25.3607215997	22.7356776056	31.1511730698	31.9699915805	29.9698102421	35.649188469	24.7803140948	45.7559419285	38.5390974991	29.5515628885	23.0930178119	43.1519693026	42.7172497358	50.2237225985	32.864589427	49.3331210635	39.0869384341	38.648237735	27.9999717035	27.3453269869	22.184840131	35.6776211784	30.9317838563	26.3422219586	73.9621535076	38.1023654254	47.9033504842	48.4163705393
MDH1	23.2380720229	17.9302570626	21.6713185512	20.2629451535	25.1813215684	24.4979745943	36.7127265992	27.9816527854	25.7866489153	12.7673294402	20.4102008475	22.195423848	24.5101703007	26.4406046968	19.6839616665	12.7647498403	17.6360629036	20.5529509662	19.8556025392	29.0183181083	12.3715290094	19.5363245784	19.998862659	21.239223364	12.1521355873	25.3715849478	23.6104784471	16.1595262587	33.5506465719	14.0930519231	16.9773884557	28.8476038857	20.8696892191	21.0942665996	22.2634060304	17.5491298841	40.9471327697	15.4973042139	9.83484602781	20.2951783318	26.6033311896	10.3811799662	20.6772854997	25.5726279069	23.0568776097	19.1001187554	22.3940797491	22.30506006	26.1658291507
HSPA5	43.6363274869	187.013460871	115.028909931	65.0859896484	48.6946303779	52.9781407316	63.2426041652	52.0086550405	111.811024442	81.0715046367	111.06672257	128.357093629	45.5576248851	50.0000769045	53.0078101427	76.7017316795	157.032676588	189.12975737	246.180408225	115.81365165	80.4218386351	118.906551704	171.84292927	132.075900964	61.8358397766	108.331853357	50.8381973578	129.022919003	197.084848726	72.1330418246	90.0201863594	93.7110707201	175.259217835	129.339080389	111.468447887	364.457629748	148.708361006	117.243871853	151.992325099	213.99436319	54.0730086145	200.398908756	211.043240821	280.590255678	241.999956433	149.102929204	240.747696447	148.602098362	145.137826471
COL5A1	18.0813451266	12.0417438136	12.2190183812	14.6678273453	20.0897837532	21.4011974065	0.922210054043	12.1415647644	5.01230968307	27.8867817667	9.61122158409	7.93410227207	17.1529291558	29.3063291759	12.5429798461	0.824205951179	7.58419826092	8.70784814682	21.0123023196	5.26960313576	6.96610127101	17.926883642	5.27314098813	11.5805080697	1.81365544893	3.29420725074	28.0609916558	12.7328577651	16.8456040008	3.262383047	0.681126100008	3.63572520681	49.5735898023	66.3558629737	30.3218253692	48.8032320761	6.33375094078	43.1719946374	15.7994986571	36.8810538009	26.3420093656	155.751832979	23.9082229837	10.8523312986	31.1304634857	17.5880370442	45.0128508701	4.79330701503	7.99926489453
MDH2	41.5464567909	56.4653727314	100.504780347	44.74242321	45.7681004959	47.3690950578	50.1790727095	49.3648067872	66.3268728041	45.8382164896	77.0603651297	62.6332414997	47.9376703408	59.9319013066	36.9240924789	63.4292901393	74.2903455118	62.3693872288	68.9055873773	58.6747597531	75.227334817	67.0533101462	98.8932735252	91.0901438089	50.0514211042	68.1503077181	45.5884718282	61.0837714371	73.6317483616	49.1718189366	58.1767274113	84.8094586427	84.091731809	196.066687808	58.8332241629	78.5020366487	106.00987589	61.5905260157	57.7905411344	56.2001358972	53.0021103071	70.2956969732	138.66203587	80.4189291227	54.4674085855	127.301686847	116.930007929	78.914616778	59.0930403581
SDC2	26.4073012832	12.070291509	6.86821317163	32.0038733476	30.6025136205	27.3045034179	13.7870412173	34.0072483511	14.185800359	23.747075671	5.98668655189	5.29485894574	28.0857340023	36.4284236932	13.6043445901	3.63371344334	7.82266778632	12.1265667133	11.9210688128	7.20165232273	6.80488643706	7.8686216265	6.45026709978	5.55853601957	4.60719585616	6.37399703279	34.7155702747	8.86129781328	8.76898348347	11.3493279556	2.14579815669	2.9371125129	9.95479796139	14.6209923884	7.19587164718	7.60154754509	6.98708472414	10.0988803052	4.70657309508	27.1156431114	23.4608808154	18.2070403679	4.73736230722	16.5260814883	15.2235832954	3.5313426173	11.0598427985	2.99212050161	1.64499470617
GAPDHS	0.0	0.0	0.0	0.0342941312212	0.0	0.0756293744918	0.0	0.019051045636	0.0	0.0	0.035191524417	0.0	0.0	0.0182918534251	0.0	0.0269030694057	0.0	0.0	0.0	0.0147701888424	0.0	0.0	0.0	0.0	0.0826977211925	0.0	0.0	0.0	0.0	0.0328401944916	0.0187909943043	0.0	0.0	0.0087461625861	0.013031008396	0.0274066430621	0.043741422497	0.0976587599055	0.0	0.0	0.0217504807425	0.00744276671705	0.00799694371596	0.00757711857705	0.0308693655054	0.029238098282	0.0	0.0	0.0240796189029
CXCR4	4.20105390271	73.9654915939	10.5759045336	2.7580600144	3.61083823532	4.5714794321	17.9657199605	5.18525518028	153.20937211	38.3800970088	9.78863565479	41.8123905513	5.56082353465	6.2779343479	41.3699487162	3.9567269976	51.2235158511	23.0001275675	24.74305078	199.966161795	6.79823193648	38.7772026194	9.34857543243	31.6915153104	2.07959551132	30.9057611055	2.94404701865	21.137732159	24.5746330021	6.10095210329	1.78397002177	4.97788067772	27.3593770363	83.0279073913	21.5563464241	14.1093224816	24.336622141	10.2786679115	29.2509333245	28.5478760491	62.9285612995	23.8057328499	24.0926231801	29.4106573034	19.4604283296	32.3309868791	38.8560901981	32.9848475441	43.8188684534
PRKAG2	6.33733187284	3.64066275433	5.21158264855	7.21299583154	6.62529236215	6.25539084363	4.95480238266	6.91905853181	4.0186529851	5.08973770083	5.90275558158	2.79732326386	6.4708809214	5.85800405433	3.44113162401	2.12210932486	4.53798855697	5.428167919	5.56100553259	3.76816882433	3.20851018212	2.42940593556	5.34442018438	4.77714452002	2.15349706936	2.01828163045	6.05309641096	3.61838050808	4.5136384163	3.411964652	2.50708665374	6.68661303569	1.89903860009	2.31016518915	2.11890866694	3.78166030404	2.80757110922	6.64905319987	2.46229058016	4.18179041435	6.5538748652	2.39027103361	1.77344210452	2.51709405886	3.31155927485	0.320684965796	1.40018472332	1.40019897657	1.92110343534
PFKFB1	0.178736788252	0.0871901935789	0.180933496025	0.0316404186863	0.10135302507	0.1618828754	0.0320377061842	0.042184458194	0.0972937149006	0.0956767421227	0.181822876154	0.0690550375728	0.120291885809	0.013501129909	0.0253824091721	0.0992851370924	0.120377754576	0.082493651111	0.150064951677	0.174428896805	0.0449057640965	0.033524003353	0.488134428853	0.0422464384316	0.116528607135	0.109074610144	0.130548541666	0.159599785509	0.0404624328673	0.121195955862	0.0138695434151	0.232966171766	0.192551007841	0.219487032518	0.173126254404	0.126429454602	0.0774848055661	0.612692457978	0.130486431593	0.0	0.27291674646	0.0933890014259	0.135757639749	0.201334865047	0.637966887111	0.158257008162	0.0287801610061	0.0827314424409	0.254747079346
NUP93	1.69254108259	3.46435389304	1.5548484886	1.37178603597	1.88711305258	1.76303576624	1.50387340419	1.6475425014	3.24465675248	2.50195196151	1.73530146377	3.0458133203	1.68953064616	2.0646872063	1.49168151834	2.72780921374	2.43685126919	4.66049570938	2.74051560777	3.07244730592	2.20749574603	2.75077452513	1.66727758346	3.091729116	2.66421062239	2.56002106276	2.33666310872	3.65738042957	4.6673321842	2.68436961818	2.25046792976	1.02676203913	4.49967117723	4.68855104215	6.24075891314	2.46546700701	6.07392230126	4.81157764496	5.41615712271	5.57381040907	1.89285824337	3.3228364342	3.95530875642	4.35229051474	5.99887092763	7.04982027817	5.59354937773	4.23949609866	8.07018178125
ERO1A	5.42696037974	10.2728397483	7.01342624979	7.70901446848	5.88843216684	5.74252898656	7.09301571987	5.64546869075	8.74205613272	5.44488294529	12.3866473047	10.1044683092	5.59565557653	3.75661427165	8.03947793215	128.863226477	9.19509681318	14.7774457643	8.80437079293	10.5075471741	58.0575629587	11.2641273068	6.62609505111	8.76957255554	140.435744622	10.4327003345	26.2451688761	10.7429336942	16.484072437	45.7239296783	135.763238477	8.55009531966	32.5237478773	22.8305770243	24.0371935179	76.131270925	16.4558766445	22.1984843385	32.0947144748	19.3385616668	7.66007093718	32.631556405	37.0471873019	20.2120190165	12.0622481951	34.3882426133	28.7306841422	24.1296971454	19.577483055
EXT2	9.11319845377	8.68587768244	11.4058784991	8.07359333665	9.46377640085	8.73017511823	7.79578122955	7.91348035246	8.2267151914	12.141383402	12.82294999	6.92742474726	7.7498891904	10.6494644655	6.14998583733	5.72347448296	10.191706442	13.466774862	14.6805672859	7.89883489611	6.86389446493	7.1219924959	9.40725357579	11.5189557816	5.46145729209	6.02168608788	11.4642002871	11.2468030463	10.1949791904	8.43908350752	5.25403808151	12.989452682	10.9712657425	10.0005088976	11.5484316701	12.2643574094	13.3188113377	15.13745142	10.5287813178	19.5683640219	9.80043908981	14.0367778334	20.1352906649	19.2850755015	16.0500689461	11.9867721732	11.9071682095	9.14759962662	16.2656443898
PRKAA1	11.922442601	8.98827537623	9.65464773859	9.19342809732	13.6741569613	13.3855730431	10.3376007478	10.8271492987	14.8134987462	11.100717973	15.0500055627	8.69769399798	13.5974784328	7.614186751	10.0260864305	5.83855907907	11.3184690273	18.8836678059	10.6861677592	13.1032864989	8.87971491987	10.2810553291	8.32850083395	9.43661714229	8.8671824824	6.97745112388	10.1902566491	10.741268621	19.2625779733	11.9542073338	7.45880502778	11.8411664871	14.4185996989	14.0647729526	44.1831012706	18.0243193571	30.6207779293	10.8110270923	12.6659896607	39.0497103163	14.7046870797	18.4234332575	15.7158635641	13.7052965064	24.8444505372	19.3156434689	11.3471452656	24.5379970803	11.9155112145
ANKZF1	2.22663917153	2.77117764952	1.73938918727	1.64093550767	2.636139344	2.43317211521	0.969770213995	2.17783900913	3.6233001039	3.42526593682	3.56212676239	3.01153995693	1.72385006769	1.76411160312	2.25372895769	3.48395261745	2.94306335722	3.24617033443	2.03720378738	5.80422558851	2.44670732582	2.6308590309	1.62708152386	2.55756997101	4.12262558094	1.5847922307	2.80518996895	2.06660725695	3.60177149598	3.04082812166	2.52362224357	2.83259369536	3.81439801874	4.15345813243	5.57851421376	7.83934686834	4.3738077018	9.26814508941	4.7814267452	2.61026784951	3.47721903573	4.60795444225	4.02992902994	4.79270643341	6.13048749177	4.74441621183	3.8557137748	4.97670390344	3.26775526645
PFKFB3	11.2774832566	12.2072117096	24.3892806787	7.57488595221	5.77181531017	6.06578491981	1.76833408157	3.1441159588	10.4281511492	13.5256120847	7.42199587183	6.14510460791	10.3491499825	6.25055759165	8.66327882709	25.7576331445	12.0091090191	7.44010555437	13.9226404697	10.1557215305	21.7981181561	6.59587977081	25.8365251624	14.8262877516	24.968970103	3.44023827857	9.65295961566	8.53201497037	10.9337451736	13.5404672542	18.9508977463	5.17421302615	12.2329647188	25.7370187632	43.6022783291	35.3796310526	7.72685804063	4.08141276583	8.75293984059	8.77393203813	3.76744438149	38.7227380954	8.64787246538	13.8867487581	5.26139358048	10.5015183347	26.0036657289	13.2110385366	14.2432739737
ECD	9.11469778732	7.12371904425	4.71300595558	8.00394979296	10.145418567	9.34751992295	7.15308915943	10.3015545285	9.50868841634	8.77615482301	5.91175851887	6.44985663114	10.7664280524	7.01980758504	6.41333002328	7.2155170437	7.18439031723	8.684292582	6.25175539421	8.81737008895	10.0161265471	5.68855146887	4.99195896585	6.45333539553	8.19859502642	5.62558736244	7.8833725426	7.19361295232	8.78188434138	8.4222807179	8.68614858443	5.21327939047	9.34517880423	9.75056933556	10.5734969904	8.54744587583	11.619904734	16.2586578545	10.295167107	12.1268909802	8.61146189809	22.1235786468	8.26955989596	10.4607578221	13.5910998324	12.6359892009	9.59046761496	13.8272580382	16.5606474186
SOX9	0.990878599327	23.0965825698	11.6471282534	1.84674550263	0.141353342207	0.709430440261	28.426010485	0.566268729536	16.3385469174	27.9383381286	20.3635152372	24.1614012301	0.651007644186	0.268320803914	17.1955082189	6.04764819656	37.067387438	53.2829322676	18.5079020772	25.4634827596	39.869252279	36.8193234284	25.4928980777	19.9295399247	6.87509898085	22.0881657078	1.05449603066	25.4897993649	41.3219433727	6.15154636563	4.45380469983	11.3053690358	60.4374650516	45.8254177389	47.2945729827	70.0739213695	21.0119298424	17.9935011818	38.9060400385	41.2417183246	26.9517475466	55.0481779527	48.8796083169	79.5730218653	29.8661725775	119.231374717	44.6542299891	81.7464441999	271.598892604
CTH	1.01788453698	1.38443327151	6.17002708896	5.64842028121	0.784856161617	0.613904372868	1.81631497732	0.953029741726	2.58639186511	3.4348769527	4.48972200217	1.82500964667	0.570724572736	0.610034069467	5.52520581696	1.6307933363	5.54965921544	1.94105442337	4.24509639796	2.45363796554	1.20209791335	2.14350866509	7.38662246014	4.47801747018	2.49778634945	1.87837865081	0.799683426265	1.42866270301	4.16818371718	0.91440691918	1.01687769261	7.11384673906	1.28861611308	2.76275117071	4.14085392939	2.3022772259	5.09196182394	0.891045160024	6.86370522064	7.15471763782	0.561142580847	0.702499749992	2.70220835954	2.80827663497	1.81942130668	1.25106116311	1.92197587233	1.7330420801	0.0959627010712
GAL3ST1	1.6191313622	4.66138802319	10.789051774	2.49499750728	0.904534596128	1.14614474563	4.85159398429	1.09826404964	3.07703429914	3.86510359477	14.2986184788	4.23943455725	1.10596211769	0.897934776893	3.50901500722	0.0406354946243	5.62163899024	5.94229904838	7.62150167782	3.15307548726	0.165411580231	6.14383753328	8.32433422753	7.31971006107	0.0605624315503	3.76482025603	0.514520779836	3.68792149382	5.17515455177	0.0909391464635	0.0189217900884	31.0990429555	0.761805054688	8.12889861036	1.79439404362	2.06980564193	1.74862172004	9.11106380899	0.0979102366057	1.18284139984	1.90546322941	0.56209293884	6.89303150407	29.8480105268	4.19637151963	3.18460100182	3.12147890114	6.65920928343	0.028288430869
MIF	30.1171327035	23.521834714	34.6675267539	24.9073033531	34.5289833095	22.2096399067	59.4532004753	26.5117718072	118.8186194	22.8250139995	47.7198975054	27.0817792257	32.3584654064	38.4710253192	50.4627928515	70.8978601533	28.5421275454	25.2591245336	19.2910285237	65.7904432835	121.882536545	56.8404464641	36.1528687844	38.4410590622	34.8669564007	31.9002221044	25.6887772473	21.1393801565	20.7616063224	27.1911924338	107.507921095	24.2099958194	49.9535999858	114.872769761	46.1743383557	125.351924519	271.895964393	78.2649894491	100.781601372	63.3579339099	48.1433652666	43.6828998432	108.066572714	198.559505991	34.9388979911	141.99506598	87.6604777068	115.539942471	76.9028262968
SDC1	1.93589392751	105.173037612	84.2171440062	10.4837636113	0.299773773454	0.335535662992	43.7509321821	0.342110675562	54.1728599792	33.2552927518	80.4218007093	108.460896185	0.604792424275	0.939058979235	23.1954551495	231.496871163	66.3460262152	131.505953984	125.220358418	55.6123658038	383.252881654	118.550499437	76.5561116757	117.907353611	196.477798618	67.9483424149	13.2251583807	147.965249713	121.911757012	176.74220654	219.947872236	101.886224992	133.657067354	83.141975228	38.6962300762	167.866062309	52.9919339639	85.3378346555	94.5682899837	60.9670097789	36.7150837525	35.127436641	67.5386319335	17.8935731264	15.9997481341	143.145931083	145.764606656	86.3112860356	134.142582463
HAX1	29.1199800111	38.8850461188	36.3721665334	29.7206865694	36.7886319116	26.3346746206	71.3490272068	27.2935402031	62.767879662	36.3704072787	20.6071973009	42.7335003371	25.033274153	41.6715413178	26.1629388663	23.8557443775	39.4045310975	38.3345814746	41.6902655881	63.9970212932	21.4851263656	45.9095591755	38.3502077862	40.990376342	16.8832918554	41.7076609233	33.0012308903	34.998511062	36.7670580182	17.6967579018	20.344708703	30.8303333555	35.995288834	33.2227998135	29.4018188924	27.0261422019	55.5779813296	36.6556830524	18.1498875875	35.9170365256	24.1928124507	28.5131011442	45.6921020565	44.959710335	29.0119512468	23.0272659189	50.1412906422	31.0838345196	21.6349919286
SLC16A3	1.35440478872	5.84991917082	8.51732112162	3.12875233706	1.27345935118	1.14434011994	1.01887385286	0.667564947374	5.52457597832	3.41974239782	7.60387512969	6.17755080867	1.20378986008	3.0688961354	2.21453125067	5.70772868587	4.38124584017	7.29481406178	6.89487673201	5.43500420452	7.80630620295	6.25111785479	8.82488167337	7.76157484655	3.38975823712	6.36866701135	2.61295756425	8.97823314791	7.69611217274	2.26129017818	3.66194802467	8.37798105619	15.8353799003	20.181433253	4.21078529243	23.9798795738	7.7840873875	5.88592005917	8.66078557095	4.67415613072	1.59409865788	17.7960490789	34.4771580979	5.27434674092	2.80804724786	1.61455736653	17.5746221162	10.6431908271	13.3607155292
OGT	9.69760817857	6.38692604679	3.24152537021	3.3274717899	10.7229424295	8.98371448565	3.13473543478	6.34984437478	9.89539063231	7.47961934961	8.49754177925	9.76692437145	7.94318862401	5.7371656303	5.78873106824	6.10015491593	7.42691751027	6.68567828091	3.88574402966	18.7865361652	5.50239132885	6.43141536156	2.92339639995	7.08281432127	14.6064547406	3.8708991711	7.65064007849	7.17201129489	10.5730374225	15.7832930077	7.28424123034	3.08281511283	10.4378286604	16.5147043977	22.983510118	22.1730524032	21.4850235292	15.1503442697	20.6482689515	7.48941215189	19.3109000939	22.8461777507	8.28476522833	13.4416021703	20.0283696449	16.7958233729	5.24164401986	13.3935392531	20.3126530909
ARTN	0.271244171571	0.210963857206	0.0116742266999	0.783939583522	0.294278393896	0.21178216602	0.198445746658	0.228634049941	0.335566481907	0.707868708085	0.085473169208	0.249512633878	0.238919117983	0.412912096099	0.320994846468	0.297242816752	0.215087184335	0.18522897237	0.137315743798	0.422045087502	0.695380455309	0.216304235329	0.236216293872	0.163549981739	0.244894205965	0.304030087147	0.381855302961	0.139019339127	0.292401207869	0.57710340653	0.322161629213	0.0327959765713	1.7592120748	0.984660621051	0.495224893383	0.0469872356787	0.109988777803	0.98226047811	0.838559417835	0.0456223518727	0.186450227133	0.250951164766	0.626105334132	0.12124529997	0.423391116954	0.0334181123329	1.66383546307	0.0732070551621	0.431180394366
FBP1	9.34155607973	84.2995485505	338.075484765	56.5821965304	1.56313343521	1.9697824747	68.7401254375	2.46359259088	51.8036853398	66.8606243761	271.253569657	79.6629346215	2.34887121162	1.73241836731	31.5154870488	1.21682625932	166.986262447	108.652002117	324.049805181	57.1524044979	6.08350339548	131.739083032	323.589229348	223.734453208	0.479248348288	72.8065175618	1.13943866375	147.761055197	91.9832631921	0.986918722591	1.04385775854	662.524125966	20.4905786986	33.5879018125	54.4931146597	31.9592923165	30.7279979042	12.7621790639	15.9788380183	37.5964752334	24.5415446806	11.0005564568	16.1964766727	24.9858619498	23.6889191367	16.242044057	28.2535944872	38.8031296706	2.14900493353
ADH1C	5.32379631783	109.989831525	128.991769463	24.3029647666	2.47647398218	1.3958661552	393.43925749	1.36135596941	79.3288441565	82.9249870839	119.851921338	163.712712968	2.5925010296	1.24735197148	35.0680635831	0.886157213924	109.053642968	376.492082423	240.998943501	113.783872936	2.23587248009	186.217655885	112.156954993	240.137659596	1.04374548111	121.096109967	1.56215289595	220.9796106	292.876073494	1.36108922753	1.58063580423	249.626646201	0.532620932979	0.128568590016	2.34123784182	4.53796911936	7.05869915308	5.3754636744	0.057750769079	9.00633581456	1.1012993416	0.194504303539	2.07680628303	1.3984835187	3.83191723807	1.08245937195	22.3543866065	28.6384228656	0.0721050810483
ALDH3A2	9.7141288058	15.711542577	18.0884738973	11.9199458445	9.97912906376	8.5346794523	28.1726499215	8.40772772036	10.0838325461	13.5039638548	21.7110368372	10.9020333098	8.8315114293	9.29046266632	11.4635010491	52.3548410591	15.293781404	30.4890095479	24.0711729367	12.0536155425	20.495555446	18.5952875256	17.7055701222	15.1929498446	54.2816492176	14.9488129938	12.4903861118	28.6960575009	27.7163905274	57.1501904234	54.4568107744	32.7000774178	14.6951905385	9.96046506234	11.8988393924	12.2064899146	11.3376398711	7.41603411065	18.33249286	18.8607580982	11.8964889386	8.16970037063	3.3674725001	11.8643618704	9.59306767132	40.5539894577	7.18239962329	31.2654895221	21.8355142758
EGLN3	5.07448679083	6.08670547146	3.17933024928	4.46494419673	7.80408652174	6.43327466795	5.55046402814	6.58873773026	3.19828523624	3.79648190369	5.69862394685	3.07057039063	5.50242150781	5.83155795723	3.42851883012	6.93960879375	4.26503944889	12.9076500972	6.16911938729	3.23169885347	3.84784366806	4.48761538348	2.54250777164	3.74520790633	4.35904715713	3.34318793659	3.13029900702	8.49148284	4.54133763448	1.77092835057	3.10685688259	13.8020880268	4.03862590845	7.67806704418	2.03347478267	18.2597448385	4.14604253009	0.812372516476	1.98878769586	4.23258307374	7.30907186351	2.34591577064	1.73156380245	0.550535993712	0.894185277498	4.13206626039	2.91358945902	2.9912155035	0.825081155708
SLC35A3	5.11593317213	5.81496841347	15.1645230625	7.35776161898	3.95211026301	5.13752485835	18.234480442	4.37486154558	6.84536134912	6.23635752957	25.0041997719	5.97365354829	5.33087734531	2.64007337512	6.79362764064	5.78402341677	15.4078243853	11.9338162858	14.0626364386	6.98493613886	6.94490198965	8.06256309321	11.9889953254	10.2299740508	6.82516696877	6.84109103799	4.20445373782	6.20362013578	12.4843040625	7.49342885246	7.5006206331	26.1752566145	6.17485258529	5.37292141067	18.9092188199	11.6850765308	15.6861787353	7.29477136955	13.9563047703	21.5203934817	7.80314963714	7.38910271136	12.1668213044	4.98671286533	5.52228267248	9.10645970645	6.54837433616	10.5733726298	11.7644789503
AC010618.1	0.123384590431	0.235111921365	0.0	0.0546045967768	0.400843777347	0.144504427488	0.0691127875546	0.121335590445	0.152643769976	0.0	0.0840501974675	0.0	0.0676950235154	0.116500315944	0.182519210609	0.0	0.0	0.0	0.117718189652	0.0940709301954	0.15499549268	0.0964254352207	0.0752156824333	0.0	0.047881775678	0.0941197264891	0.0417220123842	0.0	0.029095627827	0.0261447879627	0.119679330601	0.0304583178639	0.041537733138	0.167112213438	0.0622456029986	0.0872760813655	0.0835763783307	0.186595794084	0.168893758627	0.10895257078	0.415584657206	0.0474027783782	0.0509323165809	0.0965169234259	0.327676912667	0.0620722170376	0.0413903363736	0.101983413323	0.0255604060892
NASP	5.35990818122	4.69986012751	2.6344191559	5.05307545512	5.06976277485	5.673495453	2.45742401153	5.55491691761	6.17280817774	5.60388725592	4.64939092689	3.95335100578	4.71292362414	4.75636319711	3.06141687505	4.03703602013	4.2960246055	5.90031071152	3.15446898126	5.54953916344	3.3632146063	3.83014160562	2.48647883425	4.06586357541	6.95859895304	3.1411438632	4.57631540497	3.71313110086	4.38887784289	5.56121742135	3.77761667423	2.56840205536	9.890047223	10.9703915679	10.8922384348	12.1360181577	10.9458485088	13.7660912262	10.0347177204	8.03379572032	5.13250054429	7.60511475493	8.51807114029	18.6103056542	14.6438906975	10.3740098844	8.05752317387	12.5979543085	19.4733449739
ALDH7A1	4.19628563998	3.05401914883	3.04419101682	3.72360525981	3.16654509384	4.14077008326	5.34261548591	4.54323745889	5.53642333024	4.615575621	3.60446553677	3.00914495517	3.32358958891	5.30096244791	5.44969984271	7.83097834965	5.46801978688	5.87360286733	5.35434653302	4.16838623028	7.92175885273	4.47903192591	3.39518649407	4.1641136401	8.1843852889	2.99473961739	4.76873364874	5.08534660221	7.75362906702	10.9390231672	8.12815049131	4.05312903681	3.1851826166	3.36989479922	6.06339363512	5.95003832281	0.894113663997	6.27847192399	5.23598755901	3.79256158222	2.91140775155	5.21191181902	4.99358163369	5.78396622062	9.61875165484	10.5285428733	3.66810252324	5.75081088451	8.65687792622
NUP188	7.73466479944	8.76712793784	3.88985640154	5.32848102597	9.52434833734	7.23631843745	0.885565069932	6.67590953683	6.09852769811	8.82768760994	5.15546204384	7.82950670624	8.1224935988	7.08023027579	5.59767193247	12.8324897561	5.39636385519	9.04704311816	6.41752254326	6.35884274403	12.5918465473	5.29676751497	4.30124074393	7.33807133089	13.9775781668	4.43311988198	7.16386046904	8.34314279812	8.78351810168	12.4989806782	10.567598567	2.3235670017	24.0787848978	10.6881467782	18.4906597838	24.460166489	10.8444326505	12.6722121017	17.0388828611	17.0239983925	12.4332737508	15.062366944	11.4569779026	10.0009795385	15.8090193975	24.8621113919	11.5620798197	16.198221743	44.1704129494
SRD5A3	2.87614505006	8.92619963065	2.94856102232	3.07606718775	3.13427350864	2.3392062866	10.1883819775	2.07545625515	10.9957906676	5.17500778643	4.77716982077	14.565207262	1.55121155355	1.92359944749	3.38004105199	7.52595715289	10.3475427324	13.1899733328	6.3392843112	8.20281484891	11.6920955104	16.9723382514	4.32645029808	7.29116179223	6.31964691382	12.3918628129	3.24410828805	10.561506779	7.3255220739	6.02109734692	6.9486035961	5.12774739567	11.7401703876	8.99320804007	5.34485530382	10.4288647966	12.9759701745	3.87304478204	2.96488790032	10.468542609	3.78976538138	15.5643322814	7.83257214659	7.50470395195	9.473591769	2.82352050511	25.0497312319	9.17892251617	5.38723725451
TFF3	12.2571445838	5.70343677873	695.201639265	19.5459444938	7.44094340731	5.83257232644	138.18959859	5.99582728913	13.2001248506	26.588987133	181.523600059	7.86825395576	5.08686371909	6.89875372627	5.11338194639	1.294548981	533.539339832	8.8229078707	354.601051368	29.5047673665	1091.5697904	5.25712628608	212.809894047	225.372378928	1.1732674828	7.99501950629	4.02969270382	4.95637270543	1.79423868621	9.67361631466	0.562072746584	175.836077647	56.8789907226	24.2618175731	3.18603692609	796.748334524	142.409211372	38.8640058448	2.01175891858	60.676600824	112.751177456	926.978701382	334.42673623	6.89790255392	12.8601124774	44.8309413111	2.7214500535	0.603911197132	1.86851382972
HMMR	0.127099294182	1.31067728114	1.21408398463	0.142275772928	0.0309131876515	0.0671306772515	2.4792105438	0.113960199181	6.04446641958	0.314052747962	3.82992149802	1.92568112906	0.0574272569914	0.0458853187989	0.318518280953	1.65082729317	1.52511896027	2.6052400439	1.12702605199	2.95269434175	1.0002348229	0.882270683771	1.07560719041	1.66405458046	2.44875867717	1.334534506	0.189609374116	0.917942059035	3.60011823614	1.54620913689	2.86450470975	1.46541188912	3.94155728848	2.57877581803	13.2438432337	4.78076022529	24.9668504886	7.71869431136	8.490837636	4.42769296405	1.92223741788	8.07991557808	3.65408315177	9.71418557921	10.0230173692	8.36122698836	3.67676793699	10.066625712	22.0861780267
[truncated: 358 more columns]
